# Supplementary material for: Circulating immune cell phenotypes are associated with age, sex, CMV, and smoking status in the Framingham Heart Study offspring participants
Source: Aging (Albany NY). 2023 Apr 27;15(10):3939–66. doi: 10.18632/aging.204686 (PMC10258017; doi:10.18632/aging.204686)
Supplement: Supplementary Table 1 [file aging-15-204686-s002.xlsx]

## Sheet: Sheet1
Supplementary Table 1. Immune phenotype characterization.
Phenotype	Defining Markers	Parent Population
T cells	CD3+	Live Lymphs
T helper cells	CD4+	CD3+
CD4+CD45RA+		CD4+
CD4+CD45RO+		CD4+
CD4+CD28-		CD4+
CD4+CD57+		CD4+
CD4+CD95+		CD4+
CD4+CD127+		CD4+
CD4+CD137+		CD4+
CD4+CD27-		CD4+
CD4+PD1+		CD4+
CD4+CD28-CD57+		CD4+
CD4+CD28-CD27-		CD4+
CD4 ED (early differentiated)	CD4+CD45RA-CD27+CD28+CD57-	CD4+
CD4 ID (intermediate differentiated)	CD4+CD45RA-CD27+CD28-CDC57+	CD4+
CD4+ TEMRA	CD4+CD45RA+CD28-CD57+	CD4+
CD4 Tn (naïve)	CD4+CD45RO-CCR7+CD27+	CD4+
CD4 Tint (intermediate memory)	CD4+CD45RO-CCR7-CD27+	CD4+
CD4 Teff (effector)	CD4+CD45RO-CCR7-CD27-	CD4+
CD4 Tcm (central memory)	CD4+CD45RO+CCR7+CD27+	CD4+
CD4 Ttm (transitional memory)	CD4+CD45RO+CCR7-CD27+	CD4+
CD4 Tem (effector memory)	CD4+CD45RO+CCR7-CD27-	CD4+
Cytotoxic T cells	CD8+	CD3+
CD8+CD45RA+		CD8+
CD8+CD45RO+		CD8+
CD8+CD28-		CD8+
CD8+CD57+		CD8+
CD8+CD95+		CD8+
CD8+CD127+		CD8+
CD8+CD137+		CD8+
CD8+CD27-		CD8+
CD8+PD1+		CD8+
CD8+CD28-CD57+		CD8+
CD8+CD28-CD27-		CD8+
CD8 ED (early differentiated)	CD8+CD45RA-CD27+CD28+CD57-	CD8+
CD8 ID (intermediate differentiated)	CD8+CD45RA-CD27+CD28-CDC57+	CD8+
CD8+ TEMRA	CD8+CD45RA+CD28-CD57+	CD8+
CD8 Tn (naïve)	CD8+CD45RO-CCR7+CD27+	CD8+
CD8 Tint (intermediate memory)	CD8+CD45RO-CCR7-CD27+	CD8+
CD8 Teff (effector)	CD8+CD45RO-CCR7-CD27-	CD8+
CD8 Tcm (central memory)	CD8+CD45RO+CCR7+CD27+	CD8+
CD8 Ttm (transitional memory)	CD8+CD45RO+CCR7-CD27+	CD8+
CD8 Tem (effector memory)	CD8+CD45RO+CCR7-CD27-	CD8+
B cells	CD19+	Live Lymphs
gd T cells (gamma delta T cells)	CD3+TCR gd+	CD3+
Natural Killer (NK) cells	CD3-CD56+CD16+	Live Lymphs
CD38+ T cells	CD3+CD38+	CD3+
HLA-DR+ T cells	CD3+HLA-DR+	CD3+
CD38+HLADR+ T cells	CD3+CD38+HLADR+	CD3+
IgD B cells	CD19+IgD+	B cells
IgM B cells	CD19+IgM+	B cells
IgDIgM Bcells	CD19+IgD+IgM+	B cells
CD43+ B cells	CD19+CD43+	B cells
CD27+ B cells	CD19+CD27+	B cells
B1 cells	CD19+CD43+CD27+	B cells
Memory B cells (Bmem)	CD19+CD43-CD27+	B cells
IgD B1cell	CD19+CD43+CD27+ IgD+	B1 cells
IgM B1cell	CD19+CD43+CD27+ IgM+	B1 cells
IgD IgM B1cell	CD19+CD43+CD27+ IgD+IgM+	B1 cells
IgD Bmem	CD19+CD43-CD27+ IgD+	B mem Cells
IgM Bmem	CD19+CD43-CD27+ IgM+	B mem Cells
IgD IgM Bmem	CD19+CD43-CD27+ IgD+IgM+	B mem Cells
TH1	CD4+IFNg+	CD4+
TH2	CD4+IL4+	CD4+
TH17	CD4+IL17+	CD4+
CD4+TNFa+		CD4+
CD4+GRANZYME B+		CD4+
CD4+PERFORIN+		CD4+
CD4+TNFa+IFNg+		CD4+
CD4+IL17+IFNg+		CD4+
CD4+IL17+IFNg+		Th1
Tc1	CD8+IFNg+	CD8+
Tc2	CD8+IL4+	CD8+
Tc17	CD8+IL17+	CD8+
CD8+TNFa+		CD8+
CD8+Granzyme B+		CD8+
CD8+PERFORIN+		CD8+
CD8+TNFa+IFNg+		CD8+
CD8+IL17+IFNg+		CD8+
CD8+IL17+IFNg+		Tc1
CD4+CD25+		CD4+
CD4+CD25+CD127-	CD4+ REGULATORY T CELL	CD4+
CD4+CD25+CD127-FoxP3+		CD4+
CD4+CD25+CD127-Tbet+		CD4+
CD4+CD25+CD127-FoxP3+Tbet+		CD4+
CD4+CD25+CD127-Rorgt+		CD4+
CD4+CD25+CD127-FoxP3+Rorgt+		CD4+
CD4+FoxP3+		CD4+
CD4 FoxP3 Tregs	CD4+CD25+FoxP3+	CD4+
CD4+Tbet+		CD4+
CD4+Rorgt+		CD4+
CD4+Tbet+Rorgt+		CD4+
CD8+CD25+		CD8+
CD8+CD25+CD127-		CD8+
CD8+CD25+CD127-FoxP3+		CD8+
CD8+CD25+CD127-Tbet+		CD8+
CD8+CD25+CD127-FoxP3+Tbet+		CD8+
CD8+CD25+CD127-Rorgt+		CD8+
CD8+CD25+CD127-FoxP3+Rorgt+		CD8+
CD8+FoxP3+		CD8+
CD8 FoxP3 Tregs		CD8+
CD8+Tbet+		CD8+
CD8+Rorgt+		CD8+
CD8+Tbet+Rorgt+		CD8+
CD14 total		Gated monos
CM (Classical Monocytes)	CD14++CD16-	CD14
IM (Intermediate Monocytes)	CD14+CD16+	CD14
NCM (Non-classical monocytes)	CD14dimCD16+	CD14
HLADR+ CM	CD14++CD16-HLADR+	CM
TREM2+ CM	CD14++CD16-TREM2+	CM
CD87+ CM	CD14++CD16-CD87+	CM
CCR2+ CM	CD14++CD16-CCR2+	CM
Slan+ CM	CD14++CD16-Slan+	CM
CD33+ CM	CD14++CD16-CD33+	CM
CD163+ CM	CD14++CD16-CD163+	CM
HLADR+ IM	CD14+CD16+HLADR+	IM
TREM2+ IM	CD14+CD16+TREM2+	IM
CD87+ IM	CD14+CD16+CD87+	IM
CCR2+ IM	CD14+CD16+CCR2+	IM
Slan+ IM	CD14+CD16+Slan+	IM
CD33+ IM	CD14+CD16+CD33+	IM
CD163+ IM	CD14+CD16+CD163+	IM
HLADR+ NCM	CD14dimCD16+HLADR+	NCM
TREM2+ NCM	CD14dimCD16+TREM2+	NCM
CD87+ NCM	CD14dimCD16+CD87+	NCM
CCR2+ NCM	CD14dimCD16+CCR2+	NCM
Slan+ NCM	CD14dimCD16+Slan+	NCM
CD33+ NCM	CD14dimCD16+CD33+	NCM
CD163+ NCM	CD14dimCD16+CD163+	NCM
