# Supplementary material for: Circulating immune cell phenotypes are associated with age, sex, CMV, and smoking status in the Framingham Heart Study offspring participants
Source: Aging (Albany NY). 2023 Apr 27;15(10):3939–66. doi: 10.18632/aging.204686 (PMC10258017; doi:10.18632/aging.204686)
Supplement: Supplementary Table 2 [file aging-15-204686-s003.xlsx]

## Sheet: Sheet1
Supplementary Table 2. Number of participants with data and summary statistics for 116 immune cell phenotypes profiled in the study.
Cell types	Number of Participants with data	Missing due to poor sample quality	Missing due to assay error	Missing due to out of range low	Mean	SD	MIN	MEDIAN	MAX	CV
T cells	986	14	0	0	68.7617	13.1619	2.91	71.09	93.5	0.191413
T helper cells	986	14	0	0	64.1216	14.1366	14.54	66.03	95.17	0.220465
CD4+CD45RA+	986	14	0	0	43.6325	17.3335	2.11	44.385	94.2	0.39726
CD4+CD45RO+	986	14	0	0	37.4969	16.0165	0	35.52	81.89	0.427143
CD4+CD28-	986	14	0	0	8.26514	9.52828	0	5.225	78.2	1.15283
CD4+CD57+	986	14	0	0	5.5912	7.3925	0.08	3.035	72.27	1.32217
CD4+CD95+	986	14	0	0	47.3486	14.5424	10.41	46.255	98.48	0.307135
CD4+CD127+	986	14	0	0	92.0418	7.49252	32.65	94.12	100	0.0814035
CD4+CD137+	986	14	0	0	25.1083	12.2153	2.56	23.195	77.2	0.486502
CD4+CD27-	986	14	0	0	19.7164	12.2418	2.63	17.12	86.16	0.620894
CD4+PD1+	986	14	0	0	23.0273	19.1414	0.39	17.48	99.29	0.831248
CD4+CD28-CD57+	986	14	0	0	3.61542	6.78323	0	0.855	70.59	1.8762
CD4+CD28-CD27-	986	14	0	0	4.88763	7.99774	0	1.765	72.51	1.63632
CD4 ED (early differentiated)	986	14	0	0	24.1224	10.7868	0	22.8319	57.0477	0.44717
CD4 ID (intermediate differentiated)	986	14	0	0	0.15192	0.484974	0	0.0231823	7.69049	3.19229
CD4+ TEMRA	986	14	0	0	1.28431	2.95203	0	0.245262	34.3605	2.29854
CD4 Tn (naïve)	986	14	0	0	38.9281	17.252	0.016669	39.2823	82.4772	0.443175
CD4 Tint (intermediate memory)	986	14	0	0	0.741861	1.96453	0	0.306464	34.6468	2.64811
CD4 Teff (effector)	986	14	0	0	1.75618	3.98339	0	0.447607	46.0934	2.26821
CD4 Tcm (central memory)	986	14	0	0	20.4141	9.33236	0	19.1481	53.4061	0.457154
CD4 Ttm (transitional memory)	986	14	0	0	5.85876	3.9477	0	5.03029	27.8402	0.673811
CD4 Tem (effector memory)	986	14	0	0	6.6287	6.28837	0	4.8145	57.9706	0.948658
Cytotoxic T cells	990	10	0	0	19.8732	10.1201	2.71	17.805	63.3	0.509235
CD8+CD45RA+	990	10	0	0	46.2363	15.2184	9.8	45.775	88.95	0.329144
CD8+CD45RO+	990	10	0	0	24.8627	12.7379	1.2	22.645	84.63	0.51233
CD8+CD28-	990	10	0	0	42.6995	20.6265	1.4	40.38	90.61	0.483062
CD8+CD57+	990	10	0	0	27.1616	17.9348	1.35	23.475	86.57	0.660301
CD8+CD95+	990	10	0	0	69.4493	17.0808	11.89	72.23	98.83	0.245946
CD8+CD127+	990	10	0	0	49.8958	21.4006	2.15	51.355	94.18	0.428906
CD8+CD137+	990	10	0	0	42.1046	10.2008	10.04	42.505	72.55	0.242274
CD8+CD27-	990	10	0	0	54.1973	21.1591	5.63	53.595	97.59	0.390409
CD8+PD1+	990	10	0	0	17.3555	15.9877	1.01	12.37	97.07	0.921189
CD8+CD28-CD57+	990	10	0	0	23.2032	16.6825	0.47	19.595	76.31	0.718974
CD8+CD28-CD27-	990	10	0	0	33.8961	20.8651	0.93	30.465	87.58	0.615559
CD8 ED (early differentiated)	990	10	0	0	9.11472	7.08301	0.2125	7.22865	48.8624	0.777096
CD8 ID (intermediate differentiated)	990	10	0	0	0.466964	0.808265	0	0.183916	8.55235	1.73089
CD8+ TEMRA	990	10	0	0	12.6785	10.3668	0	10.1104	56.8354	0.817674
CD8 Tn (naïve)	990	10	0	0	17.9047	14.0958	0.1978	14.5251	70.0273	0.787267
CD8 Tint (intermediate memory)	990	10	0	0	4.48994	4.35584	0	3.26889	35.8685	0.970132
CD8 Teff (effector)	990	10	0	0	18.9378	14.163	0.451288	15.4084	72.5698	0.747871
CD8 Tcm (central memory)	990	10	0	0	4.50419	3.99073	0	3.29669	28.6827	0.886003
CD8 Ttm (transitional memory)	990	10	0	0	6.44243	5.80487	0	4.84119	40.3237	0.901037
CD8 Tem (effector memory)	990	10	0	0	10.2577	7.3205	0	8.39829	68.4995	0.713661
B cells	964	5	31	0	7.81655	6.48901	0.12	6.69	84.04	0.830164
gd T cells (gamma delta T cells)	995	5	0	0	3.62791	3.88094	0.08	2.45	34.7892	1.06975
Natural Killer (NK) cells	995	5	0	0	6.15261	4.4583	0.24436	5.06	26.9911	0.72462
CD38+ T cells	995	5	0	0	16.7878	18.1299	0.1	9.69	90.21	1.07994
HLA-DR+ T cells	995	5	0	0	2.40361	2.38052	0.18	1.51	18.2	0.990393
CD38+HLADR+ T cells	995	5	0	0	0.433216	0.553708	0	0.25	4.82	1.27813
IgD B cells	963	5	31	1	51.9555	16.5194	0.74	52.88	91.38	0.317952
IgM B cells	963	5	31	1	70.669	14.5741	2.29	73.43	96.93	0.20623
IgDIgM Bcells	963	5	31	1	49.3236	16.3595	0.08	50.36	90.93	0.331676
CD43+ B cells	963	5	31	1	24.1541	19.5806	0.32	18.47	99.2	0.810653
CD27+ B cells	962	5	31	2	16.5001	11.0184	1.46	13.925	70.05	0.667781
B1 cells	950	5	31	14	4.37594	6.09411	0	2.35	61.05	1.39264
Memory B cells (Bmem)	958	5	31	6	12.2292	8.68412	0.54	9.93	58.74	0.710115
IgD B1cell	927	5	31	37	19.2218	16.5396	0	16.17	100	0.860456
IgM B1cell	927	5	31	37	31.5798	21.1226	0	29.03	100	0.668865
IgD IgM B1cell	927	5	31	37	12.6951	14.0275	0	8.82	100	1.10495
IgD Bmem	958	5	31	6	14.5565	12.0941	0	11.65	89.95	0.830843
IgM Bmem	958	5	31	6	35.5401	17.5947	0	34.28	94.25	0.495065
IgD IgM Bmem	958	5	31	6	13.0754	11.371	0	10.475	89.47	0.869654
TH1	991	8	1	0	13.0125	7.43457	0.909816	11.5239	65.814	0.571342
TH2	991	8	1	0	1.10543	0.876095	0.0840336	0.886413	9.3553	0.792536
TH17	991	8	1	0	0.41583	0.348171	0	0.31991	3.60283	0.837292
CD4+TNFa+	991	8	1	0	35.9843	12.3303	0.762746	35.8276	76.1743	0.342658
CD4+GRANZYME B+	991	8	1	0	3.58003	6.26207	0	0.85	51.95	1.74917
CD4+PERFORIN+	991	8	1	0	1.39324	1.56573	0	0.89	11.81	1.12381
CD4+TNFa+IFNg+	991	8	1	0	8.2419	5.32416	0	7.11	44.71	0.645987
CD4+IL17+IFNg+	991	8	1	0	0.0872654	0.152022	0	0.05	1.94	1.74206
CD4+IL17+IFNg+	991	8	1	0	0.769284	1.19266	0	0.45	16.67	1.55035
Tc1	991	8	1	0	39.0635	15.2595	1.571	38.9101	87.0907	0.390634
Tc2	991	8	1	0	3.37148	2.46063	0.198983	2.82814	23.9799	0.729838
Tc17	991	8	1	0	0.897087	1.65718	0	0.39128	21.6078	1.84729
CD8+TNFa+	991	8	1	0	37.511	12.9438	1.10643	36.9266	74.2887	0.345067
CD8+Granzyme B+	991	8	1	0	32.456	20.4223	0	29.17	89.62	0.62923
CD8+PERFORIN+	991	8	1	0	5.44518	4.70816	0	4.27	29.17	0.864647
CD8+TNFa+IFNg+	991	8	1	0	24.2218	11.5228	0.37	22.8	63.98	0.475722
CD8+IL17+IFNg+	991	8	1	0	0.193239	0.38009	0	0.07	5.68	1.96694
CD8+IL17+IFNg+	991	8	1	0	0.381594	0.745722	0	0.18	10	1.95423
CD4+CD25+	996	4	0	0	4.16371	2.13285	0.4	3.925	12.15	0.512247
CD4+CD25+CD127-	996	4	0	0	1.79618	1.05738	0.07	1.55	6.82	0.588679
CD4+CD25+CD127-FoxP3+	996	4	0	0	0.0769488	0.0997934	0	0.0416745	0.905786	1.29688
CD4+CD25+CD127-Tbet+	996	4	0	0	0.618464	0.540056	0	0.455427	5.06	0.873221
CD4+CD25+CD127-FoxP3+Tbet+	996	4	0	0	0.0380795	0.0558279	0	0.017307	0.503286	1.46609
CD4+CD25+CD127-Rorgt+	996	4	0	0	1.6311	1.00494	0.07	1.40678	6.70308	0.616112
CD4+CD25+CD127-FoxP3+Rorgt+	996	4	0	0	0.093029	0.116618	0	0.052469	0.912663	1.25357
CD4+FoxP3+	996	4	0	0	0.712761	1.33751	0	0.37	32.62	1.87652
CD4 FoxP3 Tregs	996	4	0	0	0.136354	0.177095	0	0.080031	1.24873	1.29879
CD4+Tbet+	996	4	0	0	1.43581	1.14348	0.01525	1.11338	7.614	0.796403
CD4+Rorgt+	996	4	0	0	3.79317	2.36355	0.234929	3.45987	15.1818	0.623109
CD4+Tbet+Rorgt+	996	4	0	0	1.39337	1.11828	0.008931	1.07712	7.58835	0.802575
CD8+CD25+	996	4	0	0	4.03666	2.11059	0.31	3.73	20.39	0.522857
CD8+CD25+CD127-	996	4	0	0	2.33157	1.41939	0	2.065	16.05	0.608771
CD8+CD25+CD127-FoxP3+	996	4	0	0	0.046816	0.0918258	0	0	0.935	1.96142
CD8+CD25+CD127-Tbet+	996	4	0	0	1.80459	1.31504	0	1.4986	14.315	0.728719
CD8+CD25+CD127-FoxP3+Tbet+	996	4	0	0	0.0360196	0.0781019	0	0	0.935	2.16831
CD8+CD25+CD127-Rorgt+	996	4	0	0	2.08706	1.34404	0	1.83707	15.6166	0.643985
CD8+CD25+CD127-FoxP3+Rorgt+	996	4	0	0	0.0556904	0.140622	0	0	1.31376	2.52507
CD8+FoxP3+	996	4	0	0	0.108955	0.177034	0	0.047101	2.50989	1.62484
CD8 FoxP3 Tregs	996	4	0	0	0.640673	1.78461	0	0.18	39.33	2.78553
CD8+Tbet+	996	4	0	0	1.72503	1.22174	0	1.47185	14.6019	0.708245
CD8+Rorgt+	996	4	0	0	2.48062	1.47114	0	2.25636	18.4581	0.593053
CD8+Tbet+Rorgt+	996	4	0	0	1.61184	1.16762	0	1.39723	14.5389	0.724402
CD14 total	922	76	2	0	69.7157	9.09603	37.5	70.935	89.49	0.130473
CM (Classical Monocytes)	922	76	2	0	67.7817	10.6831	19.2444	67.971	99.9309	0.157611
IM (Intermediate Monocytes)	922	76	2	0	24.4616	8.76882	0.0691324	23.9388	69.4911	0.358473
NCM (Non-classical monocytes)	922	76	2	0	7.75671	4.6765	0	6.87896	48.0999	0.602897
HLADR+ CM	922	76	2	0	93.8492	6.32695	53.14	95.95	100	0.0674161
TREM2+ CM	922	76	2	0	53.0184	30.6306	0	55.675	99.69	0.577735
CD87+ CM	922	76	2	0	94.473	5.49245	54.45	96.085	100	0.0581377
CCR2+ CM	922	76	2	0	95.0746	6.24921	6.77	96.285	100	0.0657296
Slan+ CM	922	76	2	0	7.70876	6.32928	0	5.785	38.7	0.82105
CD33+ CM	922	76	2	0	59.3203	30.1397	0.25	63.245	100	0.508084
CD163+ CM	922	76	2	0	13.9796	9.38584	0.53	11.9	59.79	0.671396
HLADR+ IM	922	76	2	0	99.2229	1.99149	74.11	100	100	0.0200708
TREM2+ IM	922	76	2	0	36.9853	30.7794	0	31.325	100	0.832207
CD87+ IM	922	76	2	0	99.7868	1.7004	69.39	100	100	0.0170403
CCR2+ IM	922	76	2	0	98.6194	4.87869	15.38	99.31	100	0.0494699
Slan+ IM	922	76	2	0	10.7562	9.66886	0	7.8	58.33	0.898913
CD33+ IM	922	76	2	0	51.6112	29.736	0	52.44	100	0.576153
CD163+ IM	922	76	2	0	21.8972	13.9847	0	19.24	100	0.638655
HLADR+ NCM	922	76	2	0	98.0285	5.3047	0	100	100	0.0541138
TREM2+ NCM	922	76	2	0	28.7859	25.7706	0	21.475	100	0.89525
CD87+ NCM	922	76	2	0	95.452	10.8812	0	100	100	0.113997
CCR2+ NCM	922	76	2	0	87.988	10.4639	0	90	100	0.118924
Slan+ NCM	922	76	2	0	15.0325	12.9751	0	11.355	100	0.863137
CD33+ NCM	922	76	2	0	27.92	25.5191	0	19.92	100	0.91401
CD163+ NCM	922	76	2	0	20.67	16.337	0	16.67	100	0.790372
