# Supplementary material for: Circulating immune cell phenotypes are associated with age, sex, CMV, and smoking status in the Framingham Heart Study offspring participants
Source: Aging (Albany NY). 2023 Apr 27;15(10):3939–66. doi: 10.18632/aging.204686 (PMC10258017; doi:10.18632/aging.204686)
Supplement: Supplementary Table 3 [file aging-15-204686-s004.xlsx]

## Sheet: Sheet1
Supplementary Table 3. Fluorescent antibody information.
Assay	Antigen	Fluorochrome	Antibody	Isotype	Vendor
GDNK	CD3	VioBlue	130-114-519	130-113-442	Miltenyi
	CD27	FITC	130-113-639	130-113-437	Miltenyi
	TCR g/d	PE	130-113-512	130-113-438	Miltenyi
	CD19	APC-Vio770	130-113-643	130-113-435	Miltenyi
	CD56	PE-Vio770	130-113-313	130-113-440	Miltenyi
	CD43	APC	130-114-594	130-113-434	Miltenyi
	HLA-DR	PEVio 615	130-111-797	130-113-439	Miltenyi
	CD16	Brilliant Violet 570	302036	400160	BioLegend
	CD38	Alexa Flour 700	356624	400180	BioLegend
	IgD	Brilliant Violet 605	348232	400270	BioLegend
	IgM	Brilliant Violet 650	314526	400164	BioLegend
Th1	CD3	VioBlue	130-114-519		Miltenyi
	IL-17a	PE-Vio 615	130-118-247	130-107-771	Miltenyi
	TNF alpha	APC-Vio 770	130-120-491	130-113-197	Miltenyi
	Granzyme B	FITC	130-118-341	130-113-437	Miltenyi
	Perforin	APC	130-118-118	130-113-434	Miltenyi
	CD4	Brilliant Violet 650	300536	400164	BioLegend
	CD8	Brilliant Violet 570	301038	400160	BioLegend
	IFN-g	Alexa Flour 700	506516	400144	BioLegend
	IL-4	Brilliant Violet 605	500828	400434	BioLegend
TREG	CD3	PerCP	130-113-131	130-113-275	Miltenyi
	CD127	APC- Vio 770	130-113-416	130-113-435	Miltenyi
	FoxP3	APC	130-125-580	130-113-434	Miltenyi
	ROR gamma t	PE	130-123-248	130-113-438	Miltenyi
	T-bet	PE-Vio 615	130-121-998	130-107-771	Miltenyi
	CD152 (CTLA-4)	FITC	130-116-809	130-113-437	Miltenyi
	CD4	Brilliant Violet 650	300536	400164	BioLegend
	CD8	Brilliant Violet 570	301038	400160	BioLegend
	CD25	Brilliant Violet 605	302632	400162	BioLegend
MEMORY	CD14	VioGreen	130-110-525	130-113-456	Miltenyi
	CD4	APC-Vio 770	130-113-223	130-113-435	Miltenyi
	CD45RA	FITC	130-113-365	130-113-437	Miltenyi
	CD197 (CCR7)	VioBlue	130-117-353	130-113-442	Miltenyi
	CD27	PE Vio770	130-113-641	130-113-440	Miltenyi
	CD28	PE-Vio615	130-120-034	130-107-771	Miltenyi
	CD95	PE	130-123-706	130-113-200	Miltenyi
	CD127	APC	130-113-413	130-113-434	Miltenyi
	CD3	PE-Fire700	344864	402414	BioLegend
	CD45RO	Brilliant Violet 570	304226	400262	BioLegend
	CD57	Brilliant Violet 605	393304	400162	BioLegend
	CD137	Brilliant Violet 650	309828	400164	BioLegend
	CD279 (PD-1)	Alexa-Flour 700	329952	400144	BioLegend
	CD8	PerCP	344708	400148	BioLegend
MONOCYTE	CD19	VioGreen	130-113-649	130-113-456	Miltenyi
	CD3	VioGreen	130-113-142	130-113-456	Miltenyi
	CD14	PE-Vio770	130-110-521	130-113-440	Miltenyi
	CD16	PerCP	130-120-871	130-121-184	Miltenyi
	HLA-DR	Brilliant Violet 570	307638	400262	BioLegend
	CD163	FITC	130-112-132	130-113-437	Miltenyi
	Slan	VioBlue	130-119-868	130-098-588	Miltenyi
	CD87	PE	130-114-850	130-113-438	Miltenyi
	CD56	Brilliant Violet 510	318340	400172	BioLegend
	CD192 (CCR2)	Brilliant Violet 605	357214	400270	BioLegend
	CD33	Alexa Flour 700	50-168-85	50-169-11	Thermo Fisher
	TREM2	APC	FAB17291A	IC013A	RnD Systems
