# Supplementary material for: Circulating immune cell phenotypes are associated with age, sex, CMV, and smoking status in the Framingham Heart Study offspring participants
Source: Aging (Albany NY). 2023 Apr 27;15(10):3939–66. doi: 10.18632/aging.204686 (PMC10258017; doi:10.18632/aging.204686)
Supplement: Supplementary Table 4 [file aging-15-204686-s005.xlsx]

## Sheet: Sheet1
Supplementary Table 4. Immune cell phenotype distributions across CMV serostatus groups.
Cell types	Negative (0,11] (n=75)	Equivocal (11,15] (n=399)	Positive (15,800] (n=364)	Above LOD (>800) (n=101)	p	FDR			Number of significant
T cells	ref	-0.01 (0.12)	0.25 (0.12)	0.50 (0.15)	5.4e-06	1.46e-05			63
T helper cells	ref	0.17 (0.12)	-0.52 (0.12)	-0.72 (0.14)	1.54e-26	8.71e-26
CD4+CD45RA+	ref	0.22 (0.12)	-0.05 (0.12)	-0.04 (0.15)	0.00219	0.005			a. Model 1 covariates include age, sex, CMV serostatus groups.
CD4+CD45RO+	ref	-0.26 (0.12)	0.01 (0.13)	-0.07 (0.15)	0.00225	0.00505
CD4+CD28-	ref	-0.08 (0.11)	0.67 (0.11)	1.20 (0.14)	1.41e-43	1.19e-42
CD4+CD57+	ref	-0.08 (0.11)	0.86 (0.11)	1.38 (0.13)	2.2e-66	6.54e-65
CD4+CD95+	ref	-0.16 (0.13)	-0.08 (0.13)	-0.09 (0.15)	0.543	0.659
CD4+CD127+	ref	0.04 (0.13)	-0.15 (0.13)	-0.29 (0.15)	0.0112	0.0234
CD4+CD137+	ref	-0.07 (0.13)	0.15 (0.13)	0.06 (0.16)	0.0387	0.0678
CD4+CD27-	ref	-0.13 (0.12)	0.50 (0.12)	0.76 (0.14)	2.42e-24	1.31e-23
CD4+PD1+	ref	0.07 (0.13)	-0.11 (0.13)	0.21 (0.15)	0.0117	0.024
CD4+CD28-CD57+	ref	-0.01 (0.10)	1.00 (0.10)	1.58 (0.12)	1.47e-83	8.78e-82
CD4+CD28-CD27-	ref	-0.08 (0.10)	0.89 (0.10)	1.49 (0.13)	9.6e-75	3.81e-73
CD4 ED (early differentiated)	ref	-0.22 (0.13)	-0.23 (0.13)	-0.46 (0.15)	0.0258	0.0488
CD4 ID (intermediate differentiated)	ref	-0.03 (0.11)	0.40 (0.11)	0.63 (0.13)	1.01e-14	3.87e-14
CD4+ TEMRA	ref	0.07 (0.10)	0.94 (0.11)	1.42 (0.13)	1.3e-61	2.59e-60
CD4 Tn (naïve)	ref	0.19 (0.12)	-0.18 (0.12)	-0.22 (0.15)	7.21e-07	2.2e-06
CD4 Tint (intermediate memory)	ref	0.21 (0.13)	0.32 (0.13)	0.43 (0.15)	0.0183	0.0362
CD4 Teff (effector)	ref	0.05 (0.11)	0.86 (0.11)	1.39 (0.13)	5.89e-53	7.79e-52
CD4 Tcm (central memory)	ref	-0.21 (0.13)	-0.22 (0.13)	-0.45 (0.15)	0.0297	0.0553
CD4 Ttm (transitional memory)	ref	-0.12 (0.13)	-0.01 (0.13)	-0.12 (0.16)	0.399	0.54
CD4 Tem (effector memory)	ref	-0.11 (0.12)	0.48 (0.12)	0.78 (0.14)	3.66e-22	1.74e-21
Cytotoxic T cells	ref	-0.21 (0.11)	0.60 (0.12)	0.79 (0.14)	2.53e-36	1.77e-35
CD8+CD45RA+	ref	0.06 (0.12)	0.24 (0.13)	0.42 (0.15)	0.00257	0.00567
CD8+CD45RO+	ref	-0.20 (0.12)	-0.54 (0.13)	-0.86 (0.15)	2.49e-11	8.73e-11
CD8+CD28-	ref	-0.11 (0.10)	0.74 (0.11)	1.10 (0.13)	7.07e-52	8.41e-51
CD8+CD57+	ref	-0.04 (0.11)	0.86 (0.11)	1.06 (0.13)	9.84e-52	1.06e-50
CD8+CD95+	ref	-0.08 (0.12)	-0.07 (0.13)	-0.05 (0.15)	0.937	0.968
CD8+CD127+	ref	0.00 (0.12)	-0.62 (0.12)	-0.77 (0.14)	5.01e-23	2.59e-22
CD8+CD137+	ref	0.02 (0.12)	0.37 (0.13)	0.38 (0.15)	2.83e-06	8.03e-06
CD8+CD27-	ref	-0.14 (0.10)	0.69 (0.11)	0.96 (0.13)	2.51e-48	2.3e-47
CD8+PD1+	ref	-0.01 (0.13)	-0.24 (0.13)	0.06 (0.15)	0.00398	0.00861
CD8+CD28-CD57+	ref	-0.06 (0.10)	0.86 (0.11)	1.08 (0.13)	3.2e-54	4.75e-53
CD8+CD28-CD27-	ref	-0.08 (0.10)	0.85 (0.10)	1.22 (0.12)	2.71e-64	6.46e-63
CD8 ED (early differentiated)	ref	0.03 (0.12)	-0.56 (0.12)	-0.83 (0.15)	5.84e-21	2.67e-20
CD8 ID (intermediate differentiated)	ref	-0.00 (0.12)	-0.08 (0.12)	-0.10 (0.15)	0.658	0.746
CD8+ TEMRA	ref	0.04 (0.11)	0.86 (0.11)	1.06 (0.13)	5.76e-43	4.57e-42
CD8 Tn (naïve)	ref	0.10 (0.10)	-0.52 (0.10)	-0.72 (0.12)	9.52e-30	5.96e-29
CD8 Tint (intermediate memory)	ref	0.15 (0.12)	-0.12 (0.13)	-0.11 (0.15)	0.00175	0.00409
CD8 Teff (effector)	ref	-0.02 (0.11)	0.81 (0.11)	1.14 (0.13)	1.22e-48	1.21e-47
CD8 Tcm (central memory)	ref	0.05 (0.12)	-0.52 (0.12)	-0.68 (0.15)	1.56e-17	6.86e-17
CD8 Ttm (transitional memory)	ref	-0.02 (0.12)	-0.47 (0.12)	-0.74 (0.15)	1.08e-13	4.01e-13
CD8 Tem (effector memory)	ref	-0.30 (0.12)	-0.11 (0.13)	-0.31 (0.15)	0.0112	0.0234
B cells	ref	0.03 (0.13)	-0.20 (0.13)	-0.37 (0.15)	0.000777	0.00193
gd T cells (gamma delta T cells)	ref	-0.00 (0.12)	0.23 (0.13)	0.36 (0.15)	0.00136	0.00328
Natural Killer (NK) cells	ref	0.09 (0.12)	-0.08 (0.12)	-0.10 (0.15)	0.108	0.179
CD38+ T cells	ref	0.12 (0.13)	0.14 (0.13)	0.20 (0.15)	0.608	0.71
HLA-DR+ T cells	ref	0.19 (0.12)	0.22 (0.13)	0.47 (0.15)	0.0167	0.0337
CD38+HLADR+ T cells	ref	0.22 (0.12)	0.20 (0.13)	0.44 (0.15)	0.033	0.0594
IgD B cells	ref	-0.10 (0.12)	-0.29 (0.13)	-0.30 (0.15)	0.0222	0.0433
IgM B cells	ref	-0.02 (0.13)	-0.12 (0.13)	-0.21 (0.16)	0.311	0.435
IgDIgM Bcells	ref	-0.11 (0.12)	-0.27 (0.13)	-0.30 (0.15)	0.0495	0.0854
CD43+ B cells	ref	0.16 (0.13)	0.13 (0.13)	0.27 (0.16)	0.347	0.475
CD27+ B cells	ref	0.16 (0.13)	0.15 (0.13)	0.17 (0.16)	0.637	0.728
B1 cells	ref	0.17 (0.13)	0.07 (0.13)	0.15 (0.16)	0.458	0.599
Memory B cells (Bmem)	ref	0.11 (0.13)	0.14 (0.13)	0.11 (0.16)	0.747	0.822
IgD B1cell	ref	-0.07 (0.13)	-0.07 (0.13)	-0.13 (0.15)	0.881	0.927
IgM B1cell	ref	-0.06 (0.13)	-0.02 (0.13)	-0.05 (0.16)	0.952	0.968
IgD IgM B1cell	ref	-0.06 (0.12)	0.02 (0.13)	-0.11 (0.15)	0.554	0.664
IgD Bmem	ref	-0.05 (0.13)	-0.19 (0.13)	-0.19 (0.16)	0.174	0.269
IgM Bmem	ref	0.05 (0.13)	-0.04 (0.13)	-0.18 (0.16)	0.23	0.334
IgD IgM Bmem	ref	-0.04 (0.12)	-0.19 (0.13)	-0.19 (0.15)	0.134	0.21
TH1	ref	-0.05 (0.12)	0.59 (0.12)	0.95 (0.14)	1.24e-27	7.4e-27
TH2	ref	-0.12 (0.12)	0.07 (0.13)	0.14 (0.15)	0.0304	0.0556
TH17	ref	-0.07 (0.12)	-0.06 (0.13)	-0.08 (0.15)	0.955	0.968
CD4+TNFa+	ref	-0.02 (0.12)	0.09 (0.13)	0.20 (0.15)	0.209	0.307
CD4+GRANZYME B+	ref	-0.11 (0.10)	0.98 (0.10)	1.58 (0.12)	1.39e-95	1.65e-93
CD4+PERFORIN+	ref	-0.03 (0.12)	0.26 (0.12)	0.47 (0.15)	2.67e-06	7.75e-06
CD4+TNFa+IFNg+	ref	0.02 (0.12)	0.59 (0.12)	0.91 (0.15)	3.18e-22	1.58e-21
CD4+IL17+IFNg+	ref	-0.16 (0.12)	-0.16 (0.12)	-0.43 (0.15)	0.0244	0.0469
Tc1	ref	-0.06 (0.12)	0.38 (0.12)	0.56 (0.15)	1.87e-11	6.73e-11
Tc2	ref	-0.07 (0.12)	-0.34 (0.13)	-0.35 (0.15)	0.000419	0.00108
Tc17	ref	-0.01 (0.13)	-0.01 (0.13)	-0.13 (0.15)	0.745	0.822
CD8+TNFa+	ref	0.06 (0.12)	0.20 (0.12)	0.22 (0.15)	0.118	0.192
CD8+Granzyme B+	ref	-0.15 (0.10)	0.75 (0.10)	1.03 (0.13)	1.92e-54	3.27e-53
CD8+PERFORIN+	ref	0.04 (0.12)	0.52 (0.12)	0.71 (0.15)	7.94e-15	3.15e-14
CD8+TNFa+IFNg+	ref	0.01 (0.12)	0.51 (0.12)	0.67 (0.15)	4.4e-15	1.81e-14
CD8+IL17+IFNg+	ref	-0.15 (0.11)	0.17 (0.12)	0.03 (0.14)	8.48e-05	0.000224
CD8+IL17+IFNg+	ref	0.02 (0.12)	0.08 (0.12)	-0.07 (0.14)	0.54	0.659
CD4+CD25+	ref	-0.08 (0.13)	-0.16 (0.13)	-0.06 (0.16)	0.492	0.625
CD4+CD25+CD127-	ref	-0.06 (0.13)	-0.13 (0.13)	0.10 (0.15)	0.203	0.302
CD4+CD25+CD127-Tbet+	ref	-0.04 (0.12)	0.16 (0.13)	0.56 (0.15)	1.72e-06	5.13e-06
CD4+CD25+CD127-Rorgt+	ref	-0.05 (0.13)	-0.12 (0.13)	0.10 (0.15)	0.273	0.391
CD4+CD25+CD127-FoxP3+Rorgt+	ref	-0.01 (0.12)	0.01 (0.12)	0.04 (0.15)	0.96	0.968
CD4+FoxP3+	ref	-0.03 (0.12)	0.08 (0.13)	0.10 (0.15)	0.447	0.59
CD4 FoxP3 Tregs	ref	0.01 (0.12)	0.10 (0.12)	0.12 (0.15)	0.558	0.664
CD4+Tbet+	ref	-0.11 (0.12)	0.07 (0.13)	0.34 (0.15)	0.000656	0.00166
CD4+Rorgt+	ref	-0.16 (0.13)	-0.20 (0.13)	-0.13 (0.16)	0.468	0.606
CD4+Tbet+Rorgt+	ref	-0.10 (0.12)	0.07 (0.13)	0.33 (0.15)	0.00138	0.00328
CD8+CD25+	ref	-0.08 (0.13)	-0.10 (0.13)	-0.00 (0.15)	0.768	0.831
CD8+CD25+CD127-	ref	-0.07 (0.12)	0.25 (0.13)	0.49 (0.15)	3.49e-07	1.15e-06
CD8+CD25+CD127-Tbet+	ref	-0.05 (0.12)	0.43 (0.12)	0.72 (0.15)	1.15e-15	4.88e-15
CD8+CD25+CD127-Rorgt+	ref	-0.06 (0.12)	0.24 (0.13)	0.50 (0.15)	3.81e-07	1.22e-06
CD8+FoxP3+	ref	0.10 (0.12)	0.08 (0.12)	0.06 (0.15)	0.852	0.905
CD8 FoxP3 Tregs	ref	0.09 (0.12)	0.08 (0.12)	0.08 (0.15)	0.898	0.937
CD8+Tbet+	ref	0.01 (0.12)	0.29 (0.12)	0.56 (0.15)	6.11e-07	1.91e-06
CD8+Rorgt+	ref	-0.06 (0.13)	-0.06 (0.13)	0.10 (0.15)	0.499	0.625
CD8+Tbet+Rorgt+	ref	0.01 (0.12)	0.27 (0.13)	0.54 (0.15)	3.13e-06	8.67e-06
CD14 total	ref	0.07 (0.13)	0.04 (0.13)	0.18 (0.16)	0.608	0.71
CM (Classical Monocytes)	ref	0.04 (0.13)	0.07 (0.13)	-0.15 (0.16)	0.308	0.435
IM (Intermediate Monocytes)	ref	-0.04 (0.13)	-0.09 (0.13)	0.16 (0.16)	0.194	0.295
NCM (Non-classical monocytes)	ref	-0.01 (0.13)	0.04 (0.13)	0.11 (0.16)	0.753	0.822
TREM2+ CM	ref	0.21 (0.12)	0.13 (0.13)	0.28 (0.16)	0.196	0.295
Slan+ CM	ref	0.07 (0.13)	0.15 (0.13)	0.12 (0.16)	0.62	0.716
CD33+ CM	ref	-0.14 (0.13)	-0.20 (0.13)	-0.35 (0.16)	0.126	0.199
CD163+ CM	ref	-0.04 (0.13)	-0.22 (0.13)	-0.26 (0.16)	0.0366	0.065
TREM2+ IM	ref	0.16 (0.12)	0.09 (0.13)	0.21 (0.15)	0.422	0.564
Slan+ IM	ref	0.04 (0.13)	0.10 (0.13)	0.10 (0.16)	0.8	0.858
CD33+ IM	ref	-0.11 (0.12)	-0.18 (0.13)	-0.34 (0.16)	0.12	0.193
CD163+ IM	ref	-0.06 (0.13)	-0.22 (0.13)	-0.27 (0.16)	0.0779	0.132
TREM2+ NCM	ref	0.17 (0.12)	0.11 (0.13)	0.18 (0.15)	0.531	0.658
CD87+ NCM	ref	0.13 (0.11)	0.12 (0.11)	0.20 (0.13)	0.496	0.625
CCR2+ NCM	ref	0.00 (0.13)	0.04 (0.13)	0.02 (0.16)	0.968	0.968
Slan+ NCM	ref	-0.00 (0.13)	0.07 (0.13)	0.10 (0.16)	0.696	0.781
CD33+ NCM	ref	-0.17 (0.12)	-0.28 (0.13)	-0.33 (0.16)	0.0816	0.137
CD163+ NCM	ref	0.04 (0.13)	-0.10 (0.13)	-0.06 (0.16)	0.316	0.437
CD4/CD8	ref	0.22 (0.11)	-0.58 (0.12)	-0.77 (0.14)	1.19e-34	7.86e-34
CD4 Tn/Tm	ref	0.17 (0.12)	-0.24 (0.12)	-0.31 (0.15)	1.14e-08	3.86e-08
CD8 Tn/Tm	ref	0.15 (0.10)	-0.57 (0.10)	-0.80 (0.12)	4.81e-39	3.58e-38
The model was fitted on the complete case data adjusting Model 1 covariates a. Immune cell phenotypes were inverse normal transformed. The threshold for declaring significance was FDR < 0.05.
