# Supplementary material for: Circulating immune cell phenotypes are associated with age, sex, CMV, and smoking status in the Framingham Heart Study offspring participants
Source: Aging (Albany NY). 2023 Apr 27;15(10):3939–66. doi: 10.18632/aging.204686 (PMC10258017; doi:10.18632/aging.204686)
Supplement: Supplementary Table 5 [file aging-15-204686-s006.xlsx]

## Sheet: Sheet1
Supplementary Table 5. Immune cell phenotype distributions across CMV serostatus groups including missing as a category.
Cell types	Negative (0,11] (n=75)	Equivocal (11,15] (n=399)	Positive (15,800] (n=364)	Above LOD (>800) (n=101)	Missing (n=57)	p	FDR			Number of significant
T cells	ref	-0.01 (0.12)	0.26 (0.13)	0.50 (0.15)	0.33 (0.17)	7.65e-06	2.17e-05			68
T helper cells	ref	0.17 (0.12)	-0.51 (0.12)	-0.70 (0.14)	-0.07 (0.16)	4.02e-25	2.28e-24
CD4+CD45RA+	ref	0.21 (0.12)	-0.05 (0.12)	-0.03 (0.15)	-0.09 (0.17)	0.00457	0.00954			a. Model 1 covariates include age, sex, CMV serostatus groups.
CD4+CD45RO+	ref	-0.25 (0.12)	0.01 (0.13)	-0.08 (0.15)	0.03 (0.17)	0.00503	0.0103
CD4+CD28-	ref	-0.08 (0.11)	0.66 (0.11)	1.19 (0.14)	0.49 (0.16)	1.02e-41	8.1e-41
CD4+CD57+	ref	-0.08 (0.11)	0.86 (0.11)	1.37 (0.13)	0.79 (0.15)	2.67e-65	7.96e-64
CD4+CD95+	ref	-0.16 (0.13)	-0.08 (0.13)	-0.09 (0.15)	-0.06 (0.18)	0.7	0.753
CD4+CD127+	ref	0.04 (0.13)	-0.15 (0.13)	-0.29 (0.15)	-0.29 (0.18)	0.0104	0.0197
CD4+CD137+	ref	-0.07 (0.13)	0.15 (0.13)	0.05 (0.15)	-0.04 (0.18)	0.0779	0.116
CD4+CD27-	ref	-0.12 (0.12)	0.50 (0.12)	0.75 (0.14)	0.27 (0.16)	6.03e-23	3.26e-22
CD4+PD1+	ref	0.07 (0.13)	-0.11 (0.13)	0.22 (0.15)	-0.46 (0.18)	0.000137	0.000354
CD4+CD28-CD57+	ref	-0.01 (0.10)	0.98 (0.10)	1.56 (0.12)	0.76 (0.14)	2.23e-79	1.33e-77
CD4+CD28-CD27-	ref	-0.07 (0.10)	0.88 (0.11)	1.47 (0.13)	0.63 (0.15)	1.57e-72	6.24e-71
CD4 ED (early differentiated)	ref	-0.22 (0.13)	-0.22 (0.13)	-0.46 (0.15)	-0.18 (0.18)	0.0535	0.0826
CD4 ID (intermediate differentiated)	ref	-0.03 (0.11)	0.39 (0.11)	0.62 (0.13)	0.45 (0.15)	6.96e-14	2.59e-13
CD4+ TEMRA	ref	0.08 (0.11)	0.93 (0.11)	1.41 (0.13)	0.75 (0.15)	3.29e-58	6.53e-57
CD4 Tn (naïve)	ref	0.18 (0.12)	-0.19 (0.12)	-0.22 (0.15)	-0.18 (0.17)	2.71e-06	8.07e-06
CD4 Tint (intermediate memory)	ref	0.21 (0.12)	0.32 (0.13)	0.43 (0.15)	0.50 (0.18)	0.0143	0.0265
CD4 Teff (effector)	ref	0.05 (0.11)	0.85 (0.11)	1.38 (0.13)	0.71 (0.16)	1.56e-50	1.68e-49
CD4 Tcm (central memory)	ref	-0.21 (0.13)	-0.21 (0.13)	-0.45 (0.15)	-0.11 (0.18)	0.0524	0.0821
CD4 Ttm (transitional memory)	ref	-0.12 (0.13)	-0.01 (0.13)	-0.13 (0.15)	0.04 (0.18)	0.482	0.568
CD4 Tem (effector memory)	ref	-0.11 (0.12)	0.47 (0.12)	0.76 (0.14)	0.23 (0.17)	1.47e-20	6.98e-20
Cytotoxic T cells	ref	-0.21 (0.11)	0.59 (0.12)	0.77 (0.14)	0.31 (0.16)	2.45e-34	1.71e-33
CD8+CD45RA+	ref	0.06 (0.12)	0.23 (0.13)	0.41 (0.15)	0.07 (0.17)	0.00632	0.0127
CD8+CD45RO+	ref	-0.20 (0.12)	-0.52 (0.12)	-0.84 (0.15)	-0.20 (0.17)	7.31e-11	2.56e-10
CD8+CD28-	ref	-0.11 (0.10)	0.73 (0.11)	1.09 (0.13)	0.16 (0.15)	7.28e-51	8.66e-50
CD8+CD57+	ref	-0.05 (0.10)	0.85 (0.11)	1.05 (0.13)	0.33 (0.15)	1.5e-51	1.98e-50
CD8+CD95+	ref	-0.08 (0.12)	-0.07 (0.13)	-0.05 (0.15)	-0.04 (0.18)	0.981	0.983
CD8+CD127+	ref	0.00 (0.12)	-0.62 (0.12)	-0.76 (0.14)	-0.65 (0.16)	1.71e-22	8.82e-22
CD8+CD137+	ref	0.02 (0.12)	0.36 (0.13)	0.36 (0.15)	0.20 (0.17)	2.21e-05	5.97e-05
CD8+CD27-	ref	-0.14 (0.10)	0.69 (0.11)	0.96 (0.13)	0.53 (0.15)	1.71e-47	1.7e-46
CD8+PD1+	ref	-0.01 (0.13)	-0.24 (0.13)	0.06 (0.15)	-0.40 (0.18)	0.00115	0.00274
CD8+CD28-CD57+	ref	-0.06 (0.10)	0.85 (0.11)	1.07 (0.13)	0.32 (0.15)	5.07e-54	8.62e-53
CD8+CD28-CD27-	ref	-0.08 (0.10)	0.84 (0.10)	1.21 (0.12)	0.35 (0.14)	5.58e-63	1.33e-61
CD8 ED (early differentiated)	ref	0.03 (0.12)	-0.55 (0.12)	-0.81 (0.15)	-0.42 (0.17)	5.15e-20	2.36e-19
CD8 ID (intermediate differentiated)	ref	-0.00 (0.12)	-0.08 (0.12)	-0.10 (0.14)	-0.35 (0.17)	0.132	0.179
CD8+ TEMRA	ref	0.04 (0.11)	0.85 (0.11)	1.04 (0.13)	0.30 (0.15)	5.72e-42	4.86e-41
CD8 Tn (naïve)	ref	0.10 (0.10)	-0.52 (0.10)	-0.71 (0.12)	-0.28 (0.14)	3.56e-28	2.23e-27
CD8 Tint (intermediate memory)	ref	0.15 (0.12)	-0.12 (0.13)	-0.12 (0.15)	-0.48 (0.17)	2.94e-05	7.79e-05
CD8 Teff (effector)	ref	-0.02 (0.11)	0.79 (0.11)	1.12 (0.13)	0.34 (0.15)	2.61e-46	2.39e-45
CD8 Tcm (central memory)	ref	0.05 (0.12)	-0.50 (0.12)	-0.67 (0.15)	-0.13 (0.17)	1.29e-16	5.68e-16
CD8 Ttm (transitional memory)	ref	-0.02 (0.12)	-0.46 (0.12)	-0.74 (0.15)	-0.60 (0.17)	4.51e-14	1.73e-13
CD8 Tem (effector memory)	ref	-0.29 (0.12)	-0.11 (0.12)	-0.30 (0.15)	0.11 (0.17)	0.00293	0.00645
B cells	ref	0.03 (0.12)	-0.20 (0.13)	-0.37 (0.15)	-0.19 (0.18)	0.0022	0.00494
gd T cells (gamma delta T cells)	ref	-0.00 (0.12)	0.23 (0.13)	0.35 (0.15)	0.22 (0.18)	0.003	0.00649
Natural Killer (NK) cells	ref	0.09 (0.12)	-0.09 (0.12)	-0.11 (0.15)	0.17 (0.17)	0.0703	0.107
CD38+ T cells	ref	0.12 (0.12)	0.14 (0.13)	0.20 (0.15)	-0.35 (0.18)	0.00774	0.0153
HLA-DR+ T cells	ref	0.19 (0.12)	0.21 (0.13)	0.47 (0.15)	0.54 (0.17)	0.00391	0.0083
CD38+HLADR+ T cells	ref	0.22 (0.12)	0.20 (0.13)	0.44 (0.15)	0.05 (0.17)	0.0352	0.0582
IgD B cells	ref	-0.10 (0.12)	-0.28 (0.13)	-0.28 (0.15)	-0.02 (0.18)	0.0318	0.0533
IgM B cells	ref	-0.02 (0.13)	-0.12 (0.13)	-0.19 (0.16)	-0.41 (0.18)	0.0804	0.118
IgDIgM Bcells	ref	-0.11 (0.12)	-0.26 (0.13)	-0.28 (0.15)	-0.10 (0.18)	0.105	0.151
CD43+ B cells	ref	0.16 (0.13)	0.12 (0.13)	0.26 (0.16)	-0.25 (0.18)	0.0271	0.0483
CD27+ B cells	ref	0.16 (0.13)	0.15 (0.13)	0.17 (0.16)	0.01 (0.18)	0.629	0.7
B1 cells	ref	0.16 (0.13)	0.07 (0.13)	0.15 (0.16)	-0.19 (0.19)	0.14	0.187
Memory B cells (Bmem)	ref	0.11 (0.13)	0.14 (0.13)	0.11 (0.16)	0.14 (0.18)	0.868	0.898
IgD B1cell	ref	-0.06 (0.13)	-0.06 (0.13)	-0.11 (0.15)	-0.23 (0.18)	0.759	0.807
IgM B1cell	ref	-0.06 (0.13)	-0.02 (0.13)	-0.05 (0.16)	-0.64 (0.18)	0.00123	0.00286
IgD IgM B1cell	ref	-0.06 (0.12)	0.02 (0.13)	-0.11 (0.15)	-0.49 (0.18)	0.00996	0.0191
IgD Bmem	ref	-0.05 (0.13)	-0.19 (0.13)	-0.18 (0.16)	0.11 (0.18)	0.109	0.155
IgM Bmem	ref	0.06 (0.13)	-0.04 (0.13)	-0.17 (0.16)	-0.26 (0.18)	0.126	0.172
IgD IgM Bmem	ref	-0.04 (0.13)	-0.19 (0.13)	-0.19 (0.15)	0.01 (0.18)	0.182	0.235
TH1	ref	-0.05 (0.12)	0.58 (0.12)	0.94 (0.14)	0.30 (0.17)	4.86e-26	2.89e-25
TH2	ref	-0.12 (0.12)	0.08 (0.13)	0.15 (0.15)	-0.15 (0.18)	0.0306	0.052
TH17	ref	-0.07 (0.13)	-0.07 (0.13)	-0.08 (0.15)	0.02 (0.18)	0.944	0.961
CD4+TNFa+	ref	-0.02 (0.12)	0.09 (0.13)	0.20 (0.15)	0.00 (0.18)	0.324	0.389
CD4+GRANZYME B+	ref	-0.11 (0.10)	0.97 (0.10)	1.56 (0.12)	0.66 (0.14)	1.06e-92	1.26e-90
CD4+PERFORIN+	ref	-0.03 (0.12)	0.25 (0.12)	0.45 (0.15)	-0.40 (0.17)	8.94e-09	3.04e-08
CD4+TNFa+IFNg+	ref	0.02 (0.12)	0.58 (0.12)	0.89 (0.15)	0.33 (0.17)	9.05e-21	4.49e-20
CD4+IL17+IFNg+	ref	-0.16 (0.12)	-0.16 (0.12)	-0.44 (0.15)	-0.45 (0.17)	0.00985	0.0191
Tc1	ref	-0.06 (0.12)	0.37 (0.12)	0.55 (0.15)	-0.09 (0.17)	1.04e-11	3.75e-11
Tc2	ref	-0.07 (0.12)	-0.33 (0.13)	-0.34 (0.15)	-0.42 (0.18)	0.000823	0.002
Tc17	ref	-0.01 (0.12)	-0.01 (0.13)	-0.13 (0.15)	-0.23 (0.18)	0.469	0.558
CD8+TNFa+	ref	0.06 (0.12)	0.20 (0.12)	0.21 (0.15)	-0.01 (0.17)	0.151	0.197
CD8+Granzyme B+	ref	-0.15 (0.10)	0.75 (0.10)	1.03 (0.13)	0.29 (0.15)	5.96e-54	8.86e-53
CD8+PERFORIN+	ref	0.04 (0.12)	0.51 (0.12)	0.70 (0.15)	0.08 (0.17)	2.02e-14	8.01e-14
CD8+TNFa+IFNg+	ref	0.01 (0.12)	0.50 (0.12)	0.66 (0.15)	0.04 (0.17)	8.37e-15	3.44e-14
CD8+IL17+IFNg+	ref	-0.15 (0.11)	0.16 (0.12)	0.02 (0.14)	-0.15 (0.16)	0.000159	0.000403
CD8+IL17+IFNg+	ref	0.02 (0.12)	0.07 (0.12)	-0.08 (0.14)	-0.32 (0.17)	0.0517	0.082
CD4+CD25+	ref	-0.08 (0.13)	-0.16 (0.13)	-0.06 (0.15)	-0.16 (0.18)	0.618	0.694
CD4+CD25+CD127-	ref	-0.06 (0.12)	-0.13 (0.13)	0.10 (0.15)	-0.37 (0.18)	0.047	0.0755
CD4+CD25+CD127-Tbet+	ref	-0.04 (0.12)	0.15 (0.12)	0.55 (0.15)	0.13 (0.17)	8.82e-06	2.44e-05
CD4+CD25+CD127-Rorgt+	ref	-0.05 (0.12)	-0.12 (0.13)	0.10 (0.15)	-0.42 (0.18)	0.0277	0.0484
CD4+CD25+CD127-FoxP3+Rorgt+	ref	-0.01 (0.12)	0.01 (0.12)	0.04 (0.15)	-0.29 (0.17)	0.274	0.336
CD4+FoxP3+	ref	-0.03 (0.12)	0.08 (0.13)	0.10 (0.15)	0.13 (0.18)	0.523	0.61
CD4 FoxP3 Tregs	ref	0.01 (0.12)	0.10 (0.12)	0.12 (0.15)	0.05 (0.17)	0.69	0.753
CD4+Tbet+	ref	-0.11 (0.12)	0.07 (0.13)	0.34 (0.15)	0.28 (0.18)	0.000566	0.0014
CD4+Rorgt+	ref	-0.16 (0.13)	-0.20 (0.13)	-0.13 (0.15)	-0.22 (0.18)	0.597	0.677
CD4+Tbet+Rorgt+	ref	-0.10 (0.12)	0.06 (0.13)	0.33 (0.15)	0.25 (0.18)	0.00147	0.00337
CD8+CD25+	ref	-0.08 (0.13)	-0.10 (0.13)	-0.00 (0.15)	-0.17 (0.18)	0.803	0.838
CD8+CD25+CD127-	ref	-0.07 (0.12)	0.24 (0.12)	0.48 (0.15)	-0.08 (0.17)	3.2e-07	1e-06
CD8+CD25+CD127-Tbet+	ref	-0.05 (0.12)	0.42 (0.12)	0.71 (0.15)	0.05 (0.17)	1.84e-15	7.82e-15
CD8+CD25+CD127-Rorgt+	ref	-0.06 (0.12)	0.24 (0.12)	0.50 (0.15)	-0.13 (0.17)	1.74e-07	5.6e-07
CD8+FoxP3+	ref	0.10 (0.12)	0.08 (0.12)	0.06 (0.15)	0.06 (0.17)	0.937	0.961
CD8 FoxP3 Tregs	ref	0.09 (0.12)	0.09 (0.12)	0.09 (0.15)	0.53 (0.17)	0.0145	0.0265
CD8+Tbet+	ref	0.01 (0.12)	0.29 (0.12)	0.55 (0.15)	0.11 (0.17)	1.94e-06	5.92e-06
CD8+Rorgt+	ref	-0.06 (0.13)	-0.06 (0.13)	0.10 (0.15)	-0.25 (0.18)	0.296	0.36
CD8+Tbet+Rorgt+	ref	0.01 (0.12)	0.27 (0.12)	0.54 (0.15)	0.05 (0.17)	6.57e-06	1.91e-05
CD14 total	ref	0.07 (0.13)	0.04 (0.13)	0.18 (0.16)	0.52 (0.19)	0.0272	0.0483
CM (Classical Monocytes)	ref	0.04 (0.13)	0.07 (0.13)	-0.16 (0.16)	-0.20 (0.19)	0.204	0.258
IM (Intermediate Monocytes)	ref	-0.04 (0.13)	-0.09 (0.13)	0.17 (0.16)	0.07 (0.19)	0.262	0.325
NCM (Non-classical monocytes)	ref	-0.01 (0.13)	0.04 (0.13)	0.11 (0.16)	0.47 (0.19)	0.043	0.0701
TREM2+ CM	ref	0.21 (0.12)	0.13 (0.13)	0.28 (0.16)	0.31 (0.19)	0.228	0.285
Slan+ CM	ref	0.07 (0.13)	0.16 (0.13)	0.14 (0.16)	0.40 (0.19)	0.202	0.258
CD33+ CM	ref	-0.14 (0.13)	-0.20 (0.13)	-0.36 (0.16)	-0.36 (0.19)	0.114	0.159
CD163+ CM	ref	-0.04 (0.13)	-0.22 (0.13)	-0.26 (0.16)	-0.10 (0.19)	0.0731	0.11
TREM2+ IM	ref	0.16 (0.12)	0.08 (0.13)	0.20 (0.15)	0.13 (0.18)	0.589	0.674
Slan+ IM	ref	0.04 (0.13)	0.12 (0.13)	0.12 (0.16)	0.16 (0.19)	0.773	0.815
CD33+ IM	ref	-0.11 (0.13)	-0.19 (0.13)	-0.35 (0.16)	-0.33 (0.19)	0.119	0.164
CD163+ IM	ref	-0.06 (0.13)	-0.22 (0.13)	-0.27 (0.16)	-0.16 (0.19)	0.151	0.197
TREM2+ NCM	ref	0.17 (0.12)	0.11 (0.13)	0.17 (0.15)	0.27 (0.18)	0.53	0.612
CD87+ NCM	ref	0.13 (0.11)	0.12 (0.11)	0.21 (0.13)	0.13 (0.16)	0.655	0.721
CCR2+ NCM	ref	0.00 (0.13)	0.04 (0.13)	0.02 (0.16)	0.07 (0.19)	0.983	0.983
Slan+ NCM	ref	-0.01 (0.13)	0.09 (0.13)	0.12 (0.16)	-0.00 (0.19)	0.703	0.753
CD33+ NCM	ref	-0.17 (0.13)	-0.28 (0.13)	-0.34 (0.16)	-0.51 (0.18)	0.0293	0.0506
CD163+ NCM	ref	0.04 (0.13)	-0.10 (0.13)	-0.06 (0.16)	-0.35 (0.19)	0.0995	0.144
CD4/CD8	ref	0.22 (0.11)	-0.57 (0.12)	-0.75 (0.14)	-0.23 (0.16)	8.77e-33	5.8e-32
CD4 Tn/Tm	ref	0.17 (0.12)	-0.24 (0.12)	-0.30 (0.15)	-0.23 (0.17)	4.67e-08	1.54e-07
CD8 Tn/Tm	ref	0.14 (0.10)	-0.57 (0.10)	-0.79 (0.12)	-0.31 (0.14)	4.43e-37	3.3e-36
The model was fitted on the complete case data adjusting Model 1 covariates a. Immune cell phenotypes were inverse normal transformed. The threshold for declaring significance was FDR < 0.05.
