# Supplementary material for: Circulating immune cell phenotypes are associated with age, sex, CMV, and smoking status in the Framingham Heart Study offspring participants
Source: Aging (Albany NY). 2023 Apr 27;15(10):3939–66. doi: 10.18632/aging.204686 (PMC10258017; doi:10.18632/aging.204686)
Supplement: Supplementary Table 6 [file aging-15-204686-s007.xlsx]

## Sheet: Sheet1
Supplementary Table 6. Immune cell phenotype distributions across age groups adjusted for all Model 2 covariates a using multiple imputations.
Cell types	<=55 (n=286)	(55,60] (n=208)	(60,65] (n=166)	(65,70] (n=140)	>70 (n=196)	p	FDR			Number of significant
T cells	ref	-0.01 (0.09)	-0.23 (0.10)	-0.33 (0.11)	-0.35 (0.10)	0.000864	0.00934			18
T helper cells	ref	0.23 (0.08)	0.13 (0.09)	0.23 (0.10)	0.15 (0.10)	0.0523	0.231
CD4+CD45RA+	ref	0.01 (0.09)	-0.15 (0.10)	-0.40 (0.11)	-0.26 (0.11)	0.00111	0.0102			a. Model 2 covariates include age, sex, CMV status, education level, APOE genotypes, BMI groups, and indicators of smoking, presence of diabetes, prevalent CVD, prevalent AF, SBP, on hypertension treatment at exam 7, TC, HDL, on lipid treatment at exam 7, and cancer prior to exam 7. CMV was treated as linear with participants whose CMV above LOD was set as a fixed value above the LOD. b. The thre…
CD4+CD45RO+	ref	-0.05 (0.09)	0.12 (0.10)	0.26 (0.11)	0.22 (0.11)	0.0289	0.164
CD4+CD28-	ref	-0.05 (0.08)	0.08 (0.09)	0.03 (0.09)	0.04 (0.09)	0.652	0.835
CD4+CD57+	ref	-0.06 (0.07)	0.07 (0.08)	0.03 (0.09)	0.04 (0.09)	0.559	0.801
CD4+CD95+	ref	-0.10 (0.09)	0.03 (0.10)	0.16 (0.11)	0.15 (0.11)	0.119	0.382
CD4+CD127+	ref	-0.02 (0.09)	-0.05 (0.10)	0.04 (0.11)	0.12 (0.11)	0.615	0.804
CD4+CD137+	ref	0.02 (0.09)	-0.00 (0.10)	0.17 (0.11)	0.17 (0.11)	0.334	0.663
CD4+CD27-	ref	-0.10 (0.08)	0.09 (0.09)	0.16 (0.10)	0.19 (0.10)	0.0289	0.164
CD4+PD1+	ref	-0.08 (0.09)	-0.02 (0.10)	-0.09 (0.11)	-0.00 (0.11)	0.839	0.921
CD4+CD28-CD57+	ref	-0.03 (0.07)	0.05 (0.07)	-0.01 (0.08)	0.04 (0.08)	0.82	0.921
CD4+CD28-CD27-	ref	-0.02 (0.07)	0.07 (0.08)	0.10 (0.09)	0.11 (0.08)	0.459	0.75
CD4 ED (early differentiated)	ref	0.01 (0.09)	0.10 (0.10)	0.29 (0.11)	0.19 (0.11)	0.0651	0.258
CD4 ID (intermediate differentiated)	ref	0.01 (0.08)	-0.03 (0.09)	0.08 (0.09)	-0.07 (0.09)	0.625	0.808
CD4+ TEMRA	ref	-0.06 (0.07)	0.00 (0.08)	-0.03 (0.09)	-0.04 (0.09)	0.894	0.95
CD4 Tn (naïve)	ref	0.01 (0.09)	-0.21 (0.10)	-0.41 (0.11)	-0.33 (0.10)	0.000135	0.00201
CD4 Tint (intermediate memory)	ref	-0.00 (0.09)	0.17 (0.10)	-0.16 (0.11)	-0.06 (0.11)	0.0675	0.259
CD4 Teff (effector)	ref	-0.06 (0.08)	0.07 (0.08)	-0.07 (0.09)	-0.00 (0.09)	0.557	0.801
CD4 Tcm (central memory)	ref	0.03 (0.09)	0.11 (0.10)	0.30 (0.11)	0.22 (0.11)	0.0558	0.237
CD4 Ttm (transitional memory)	ref	-0.04 (0.09)	0.04 (0.10)	0.14 (0.11)	0.05 (0.11)	0.614	0.804
CD4 Tem (effector memory)	ref	-0.13 (0.08)	0.08 (0.09)	0.10 (0.10)	0.08 (0.10)	0.0996	0.349
Cytotoxic T cells	ref	-0.23 (0.08)	-0.15 (0.09)	-0.12 (0.10)	-0.17 (0.09)	0.0618	0.253
CD8+CD45RA+	ref	-0.10 (0.09)	-0.35 (0.10)	-0.37 (0.11)	-0.42 (0.11)	0.000134	0.00201
CD8+CD45RO+	ref	0.08 (0.09)	0.35 (0.10)	0.20 (0.11)	0.27 (0.10)	0.00482	0.0318
CD8+CD28-	ref	0.08 (0.07)	0.18 (0.08)	0.30 (0.09)	0.39 (0.09)	0.000109	0.00201
CD8+CD57+	ref	0.07 (0.07)	0.10 (0.08)	0.25 (0.09)	0.34 (0.09)	0.00201	0.0159
CD8+CD95+	ref	0.20 (0.09)	0.38 (0.10)	0.26 (0.11)	0.39 (0.11)	0.000814	0.00934
CD8+CD127+	ref	-0.07 (0.08)	-0.18 (0.09)	-0.16 (0.10)	-0.20 (0.10)	0.208	0.549
CD8+CD137+	ref	0.05 (0.09)	0.14 (0.10)	-0.02 (0.11)	0.09 (0.11)	0.584	0.804
CD8+CD27-	ref	0.10 (0.07)	0.33 (0.08)	0.42 (0.09)	0.50 (0.09)	1.58e-08	4.7e-07
CD8+PD1+	ref	-0.10 (0.09)	-0.06 (0.10)	-0.09 (0.11)	-0.05 (0.11)	0.847	0.921
CD8+CD28-CD57+	ref	0.07 (0.07)	0.12 (0.08)	0.26 (0.09)	0.32 (0.09)	0.00258	0.0192
CD8+CD28-CD27-	ref	0.10 (0.07)	0.24 (0.08)	0.35 (0.08)	0.41 (0.08)	5.09e-06	0.000121
CD8 ED (early differentiated)	ref	0.09 (0.09)	0.13 (0.09)	0.08 (0.10)	0.06 (0.10)	0.664	0.836
CD8 ID (intermediate differentiated)	ref	0.04 (0.09)	-0.05 (0.09)	-0.09 (0.10)	0.10 (0.10)	0.346	0.663
CD8+ TEMRA	ref	0.08 (0.08)	0.07 (0.08)	0.23 (0.09)	0.26 (0.09)	0.0311	0.168
CD8 Tn (naïve)	ref	-0.17 (0.07)	-0.45 (0.08)	-0.63 (0.09)	-0.84 (0.09)	1.59e-21	1.89e-19
CD8 Tint (intermediate memory)	ref	0.18 (0.09)	0.05 (0.10)	0.00 (0.11)	0.06 (0.11)	0.314	0.644
CD8 Teff (effector)	ref	0.14 (0.07)	0.18 (0.08)	0.34 (0.09)	0.33 (0.09)	0.00109	0.0102
CD8 Tcm (central memory)	ref	0.10 (0.09)	0.15 (0.09)	0.09 (0.10)	0.07 (0.10)	0.597	0.804
CD8 Ttm (transitional memory)	ref	0.06 (0.09)	0.06 (0.10)	0.04 (0.11)	0.05 (0.10)	0.954	0.979
CD8 Tem (effector memory)	ref	0.02 (0.09)	0.29 (0.10)	0.19 (0.11)	0.26 (0.11)	0.0148	0.093
B cells	ref	0.02 (0.09)	-0.10 (0.10)	0.15 (0.11)	0.12 (0.11)	0.192	0.533
gd T cells (gamma delta T cells)	ref	-0.12 (0.09)	-0.06 (0.10)	-0.22 (0.11)	-0.03 (0.11)	0.251	0.572
Natural Killer (NK) cells	ref	-0.01 (0.09)	0.19 (0.10)	0.21 (0.11)	0.25 (0.11)	0.0434	0.198
CD38+ T cells	ref	0.02 (0.09)	0.15 (0.10)	0.07 (0.11)	0.14 (0.11)	0.533	0.801
HLA-DR+ T cells	ref	-0.05 (0.09)	-0.00 (0.10)	-0.06 (0.11)	0.20 (0.11)	0.103	0.349
CD38+HLADR+ T cells	ref	0.02 (0.09)	0.12 (0.10)	0.08 (0.11)	0.25 (0.11)	0.158	0.471
IgD B cells	ref	0.03 (0.09)	-0.09 (0.10)	-0.14 (0.11)	-0.09 (0.11)	0.53	0.801
IgM B cells	ref	0.05 (0.09)	0.01 (0.10)	-0.11 (0.11)	-0.10 (0.11)	0.552	0.801
IgDIgM Bcells	ref	0.02 (0.09)	-0.07 (0.10)	-0.15 (0.11)	-0.11 (0.11)	0.53	0.801
CD43+ B cells	ref	-0.06 (0.09)	-0.04 (0.10)	-0.02 (0.11)	0.14 (0.11)	0.382	0.707
CD27+ B cells	ref	-0.03 (0.09)	-0.05 (0.10)	-0.08 (0.11)	-0.13 (0.11)	0.824	0.921
B1 cells	ref	-0.08 (0.09)	-0.07 (0.10)	-0.04 (0.11)	0.11 (0.11)	0.394	0.707
Memory B cells (Bmem)	ref	0.01 (0.09)	-0.02 (0.10)	-0.06 (0.11)	-0.12 (0.11)	0.731	0.87
IgD B1cell	ref	-0.00 (0.09)	0.05 (0.10)	-0.14 (0.11)	-0.14 (0.10)	0.34	0.663
IgM B1cell	ref	0.01 (0.09)	0.12 (0.10)	0.02 (0.11)	-0.03 (0.11)	0.613	0.804
IgD IgM B1cell	ref	0.01 (0.09)	0.02 (0.09)	-0.16 (0.10)	-0.16 (0.10)	0.275	0.585
IgD Bmem	ref	0.00 (0.09)	-0.10 (0.10)	-0.03 (0.11)	-0.02 (0.11)	0.85	0.921
IgM Bmem	ref	0.08 (0.09)	-0.03 (0.10)	-0.06 (0.11)	-0.08 (0.11)	0.596	0.804
IgD IgM Bmem	ref	0.01 (0.09)	-0.10 (0.10)	-0.07 (0.11)	-0.06 (0.11)	0.781	0.902
TH1	ref	-0.00 (0.08)	0.06 (0.09)	0.08 (0.10)	0.00 (0.10)	0.888	0.95
TH2	ref	0.01 (0.09)	0.10 (0.10)	0.06 (0.11)	0.18 (0.11)	0.451	0.75
TH17	ref	-0.05 (0.09)	0.01 (0.10)	-0.09 (0.11)	0.09 (0.11)	0.497	0.778
CD4+TNFa+	ref	0.10 (0.09)	0.28 (0.10)	0.17 (0.11)	0.20 (0.11)	0.073	0.264
CD4+GRANZYME B+	ref	0.00 (0.07)	0.08 (0.07)	0.07 (0.08)	0.08 (0.08)	0.706	0.849
CD4+PERFORIN+	ref	-0.02 (0.09)	0.02 (0.10)	-0.07 (0.11)	-0.01 (0.11)	0.958	0.979
CD4+TNFa+IFNg+	ref	0.04 (0.09)	0.18 (0.09)	0.11 (0.10)	0.07 (0.10)	0.417	0.711
CD4+IL17+IFNg+	ref	-0.05 (0.09)	-0.07 (0.10)	-0.10 (0.11)	-0.10 (0.11)	0.851	0.921
Tc1	ref	0.13 (0.09)	0.21 (0.10)	0.26 (0.10)	0.24 (0.10)	0.0732	0.264
Tc2	ref	0.11 (0.09)	0.16 (0.10)	0.05 (0.11)	0.15 (0.11)	0.46	0.75
Tc17	ref	0.06 (0.09)	0.05 (0.10)	0.08 (0.11)	0.24 (0.11)	0.255	0.572
CD8+TNFa+	ref	0.24 (0.09)	0.53 (0.10)	0.48 (0.11)	0.57 (0.10)	1.52e-08	4.7e-07
CD8+Granzyme B+	ref	0.12 (0.07)	0.22 (0.08)	0.26 (0.09)	0.34 (0.09)	0.00158	0.0135
CD8+PERFORIN+	ref	0.09 (0.09)	0.22 (0.09)	0.28 (0.10)	0.24 (0.10)	0.0398	0.19
CD8+TNFa+IFNg+	ref	0.15 (0.09)	0.33 (0.09)	0.27 (0.10)	0.32 (0.10)	0.0033	0.0231
CD8+IL17+IFNg+	ref	0.07 (0.08)	0.07 (0.09)	0.07 (0.10)	-0.00 (0.10)	0.805	0.921
CD8+IL17+IFNg+	ref	-0.01 (0.09)	0.04 (0.09)	0.06 (0.10)	0.08 (0.10)	0.911	0.959
CD4+CD25+	ref	0.07 (0.09)	0.00 (0.10)	-0.07 (0.11)	0.04 (0.11)	0.757	0.892
CD4+CD25+CD127-	ref	0.12 (0.09)	0.12 (0.10)	-0.03 (0.11)	0.19 (0.11)	0.212	0.55
CD4+CD25+CD127-Tbet+	ref	0.11 (0.09)	0.17 (0.10)	0.11 (0.11)	0.25 (0.11)	0.17	0.494
CD4+CD25+CD127-Rorgt+	ref	0.12 (0.09)	0.13 (0.10)	0.01 (0.11)	0.19 (0.11)	0.263	0.577
CD4+CD25+CD127-FoxP3+Rorgt+	ref	0.02 (0.09)	0.12 (0.10)	0.16 (0.11)	0.18 (0.11)	0.361	0.681
CD4+FoxP3+	ref	0.02 (0.09)	0.14 (0.10)	0.09 (0.11)	0.06 (0.11)	0.667	0.836
CD4 FoxP3 Tregs	ref	0.00 (0.09)	0.06 (0.10)	0.03 (0.11)	0.02 (0.11)	0.974	0.979
CD4+Tbet+	ref	-0.00 (0.09)	0.03 (0.10)	-0.04 (0.11)	0.03 (0.11)	0.97	0.979
CD4+Rorgt+	ref	0.04 (0.09)	-0.04 (0.10)	-0.17 (0.11)	-0.07 (0.11)	0.406	0.71
CD4+Tbet+Rorgt+	ref	0.00 (0.09)	0.03 (0.10)	-0.03 (0.11)	0.02 (0.11)	0.979	0.979
CD8+CD25+	ref	-0.05 (0.09)	-0.01 (0.10)	-0.13 (0.11)	0.08 (0.11)	0.418	0.711
CD8+CD25+CD127-	ref	0.01 (0.09)	0.04 (0.10)	-0.05 (0.11)	0.12 (0.11)	0.598	0.804
CD8+CD25+CD127-Tbet+	ref	0.06 (0.09)	0.13 (0.09)	0.11 (0.10)	0.24 (0.10)	0.193	0.533
CD8+CD25+CD127-Rorgt+	ref	0.03 (0.09)	0.04 (0.10)	-0.03 (0.11)	0.12 (0.11)	0.705	0.849
CD8+FoxP3+	ref	-0.11 (0.09)	-0.11 (0.10)	-0.04 (0.10)	-0.02 (0.10)	0.675	0.837
CD8 FoxP3 Tregs	ref	-0.01 (0.09)	-0.14 (0.10)	-0.06 (0.10)	-0.11 (0.10)	0.587	0.804
CD8+Tbet+	ref	-0.07 (0.09)	0.01 (0.10)	0.04 (0.11)	0.17 (0.10)	0.233	0.569
CD8+Rorgt+	ref	-0.11 (0.09)	-0.07 (0.10)	-0.09 (0.11)	0.05 (0.11)	0.497	0.778
CD8+Tbet+Rorgt+	ref	-0.07 (0.09)	0.01 (0.10)	0.03 (0.11)	0.16 (0.11)	0.325	0.655
CD14 total	ref	-0.01 (0.09)	0.02 (0.10)	0.00 (0.11)	-0.04 (0.11)	0.967	0.979
CM (Classical Monocytes)	ref	-0.12 (0.09)	0.03 (0.10)	-0.04 (0.11)	-0.14 (0.11)	0.397	0.707
IM (Intermediate Monocytes)	ref	0.14 (0.09)	-0.01 (0.10)	0.08 (0.11)	0.19 (0.11)	0.241	0.569
NCM (Non-classical monocytes)	ref	0.01 (0.09)	-0.11 (0.10)	-0.07 (0.11)	-0.08 (0.11)	0.705	0.849
TREM2+ CM	ref	0.05 (0.09)	0.01 (0.10)	-0.06 (0.11)	0.18 (0.11)	0.244	0.569
Slan+ CM	ref	0.01 (0.09)	-0.00 (0.10)	-0.18 (0.11)	-0.07 (0.11)	0.485	0.778
CD33+ CM	ref	-0.11 (0.09)	0.16 (0.10)	0.05 (0.11)	-0.03 (0.11)	0.112	0.37
CD163+ CM	ref	0.17 (0.09)	0.19 (0.10)	-0.09 (0.11)	0.15 (0.11)	0.0336	0.174
TREM2+ IM	ref	0.07 (0.09)	0.09 (0.10)	0.02 (0.11)	0.25 (0.11)	0.151	0.461
Slan+ IM	ref	-0.04 (0.09)	0.10 (0.10)	-0.16 (0.11)	-0.05 (0.11)	0.243	0.569
CD33+ IM	ref	-0.11 (0.09)	0.11 (0.10)	0.05 (0.11)	-0.06 (0.11)	0.205	0.549
CD163+ IM	ref	0.18 (0.09)	0.07 (0.10)	-0.06 (0.11)	0.14 (0.11)	0.122	0.383
TREM2+ NCM	ref	0.07 (0.09)	0.09 (0.10)	0.03 (0.11)	0.21 (0.11)	0.295	0.616
CD87+ NCM	ref	0.09 (0.08)	0.05 (0.08)	0.09 (0.09)	0.14 (0.09)	0.552	0.801
CCR2+ NCM	ref	0.14 (0.09)	-0.05 (0.10)	0.03 (0.11)	0.12 (0.11)	0.267	0.577
Slan+ NCM	ref	0.02 (0.09)	0.00 (0.10)	-0.17 (0.11)	0.02 (0.11)	0.398	0.707
CD33+ NCM	ref	-0.04 (0.09)	0.17 (0.10)	0.12 (0.11)	0.03 (0.11)	0.219	0.553
CD163+ NCM	ref	0.05 (0.09)	0.00 (0.10)	-0.09 (0.11)	0.00 (0.11)	0.766	0.893
CD4/CD8	ref	0.25 (0.08)	0.16 (0.09)	0.17 (0.10)	0.17 (0.10)	0.0375	0.186
CD4 Tn/Tm	ref	0.03 (0.09)	-0.18 (0.10)	-0.36 (0.11)	-0.29 (0.10)	0.000779	0.00934
CD8 Tn/Tm	ref	-0.14 (0.07)	-0.43 (0.08)	-0.58 (0.09)	-0.75 (0.09)	2.99e-18	1.78e-16
CMV levels were log-transformed; immune cell phenotypes were inverse normal transformed. Models were fitted for 10 imputed datasets; effect estimates, and p-values were pooled over the 10 fitted models. FDRs were calculated on the pooled p-values b.
