# Supplementary material for: Circulating immune cell phenotypes are associated with age, sex, CMV, and smoking status in the Framingham Heart Study offspring participants
Source: Aging (Albany NY). 2023 Apr 27;15(10):3939–66. doi: 10.18632/aging.204686 (PMC10258017; doi:10.18632/aging.204686)
Supplement: Supplementary Table 7 [file aging-15-204686-s008.xlsx]

## Sheet: Sheet1
Supplementary Table 7. Immune cell phenotype distributions between males and females adjusted for all Model 2 covariates a using multiple imputations.
Cell types	Female (n=516)	Male (n=480)	p	FDR			Number of significant
T cells	ref	-0.16 (0.07)	0.0203	0.0689			32
T helper cells	ref	-0.40 (0.07)	3.73e-09	5.55e-08
CD4+CD45RA+	ref	-0.14 (0.07)	0.0554	0.165			a. Model 2 covariates include age, sex, CMV status, education level, APOE genotypes, BMI groups, and indicators of smoking, presence of diabetes, prevalent CVD, prevalent AF, SBP, on hypertension treatment at exam 7, TC, HDL, on lipid treatment at exam 7, and cancer prior to exam 7. CMV was treated as linear with participants whose CMV above LOD was set as a fixed value above the LOD. b. The thre…
CD4+CD45RO+	ref	0.09 (0.07)	0.194	0.385
CD4+CD28-	ref	0.15 (0.06)	0.0142	0.0514
CD4+CD57+	ref	0.16 (0.06)	0.00654	0.0268
CD4+CD95+	ref	0.07 (0.07)	0.33	0.5
CD4+CD127+	ref	-0.13 (0.07)	0.0627	0.182
CD4+CD137+	ref	0.04 (0.07)	0.603	0.736
CD4+CD27-	ref	0.22 (0.07)	0.000945	0.00489
CD4+PD1+	ref	-0.08 (0.07)	0.282	0.486
CD4+CD28-CD57+	ref	0.21 (0.05)	0.000165	0.00115
CD4+CD28-CD27-	ref	0.16 (0.06)	0.0051	0.0225
CD4 ED (early differentiated)	ref	-0.02 (0.07)	0.792	0.867
CD4 ID (intermediate differentiated)	ref	0.16 (0.06)	0.00901	0.0346
CD4+ TEMRA	ref	0.17 (0.06)	0.00407	0.0194
CD4 Tn (naïve)	ref	-0.20 (0.07)	0.00333	0.0165
CD4 Tint (intermediate memory)	ref	0.07 (0.07)	0.319	0.493
CD4 Teff (effector)	ref	0.24 (0.06)	8.85e-05	0.000658
CD4 Tcm (central memory)	ref	0.01 (0.07)	0.878	0.917
CD4 Ttm (transitional memory)	ref	-0.01 (0.07)	0.855	0.917
CD4 Tem (effector memory)	ref	0.24 (0.07)	0.000306	0.00202
Cytotoxic T cells	ref	0.39 (0.06)	1.2e-09	2.41e-08
CD8+CD45RA+	ref	-0.12 (0.07)	0.084	0.214
CD8+CD45RO+	ref	0.08 (0.07)	0.266	0.48
CD8+CD28-	ref	0.29 (0.06)	6.3e-07	6.25e-06
CD8+CD57+	ref	0.32 (0.06)	2.66e-08	3.17e-07
CD8+CD95+	ref	-0.08 (0.07)	0.259	0.48
CD8+CD127+	ref	-0.31 (0.07)	2.83e-06	2.4e-05
CD8+CD137+	ref	0.20 (0.07)	0.00463	0.0212
CD8+CD27-	ref	0.35 (0.06)	1.22e-09	2.41e-08
CD8+PD1+	ref	-0.10 (0.07)	0.159	0.343
CD8+CD28-CD57+	ref	0.34 (0.06)	2.6e-09	4.42e-08
CD8+CD28-CD27-	ref	0.30 (0.05)	5.17e-08	5.59e-07
CD8 ED (early differentiated)	ref	-0.13 (0.07)	0.0489	0.153
CD8 ID (intermediate differentiated)	ref	0.14 (0.07)	0.039	0.125
CD8+ TEMRA	ref	0.36 (0.06)	5.87e-09	7.76e-08
CD8 Tn (naïve)	ref	-0.41 (0.06)	3.89e-12	2.31e-10
CD8 Tint (intermediate memory)	ref	0.01 (0.07)	0.873	0.917
CD8 Teff (effector)	ref	0.27 (0.06)	6.91e-06	5.48e-05
CD8 Tcm (central memory)	ref	-0.18 (0.07)	0.0083	0.0329
CD8 Ttm (transitional memory)	ref	-0.05 (0.07)	0.466	0.63
CD8 Tem (effector memory)	ref	0.25 (0.07)	0.000593	0.00344
B cells	ref	-0.24 (0.07)	0.000606	0.00344
gd T cells (gamma delta T cells)	ref	0.03 (0.07)	0.634	0.754
Natural Killer (NK) cells	ref	0.25 (0.07)	0.000329	0.00206
CD38+ T cells	ref	0.01 (0.07)	0.867	0.917
HLA-DR+ T cells	ref	0.07 (0.07)	0.301	0.486
CD38+HLADR+ T cells	ref	0.00 (0.07)	0.915	0.924
IgD B cells	ref	-0.09 (0.07)	0.203	0.396
IgM B cells	ref	-0.13 (0.07)	0.0719	0.204
IgDIgM Bcells	ref	-0.10 (0.07)	0.189	0.385
CD43+ B cells	ref	0.05 (0.07)	0.5	0.647
CD27+ B cells	ref	-0.01 (0.07)	0.898	0.922
B1 cells	ref	0.05 (0.07)	0.509	0.651
Memory B cells (Bmem)	ref	-0.02 (0.07)	0.787	0.867
IgD B1cell	ref	-0.10 (0.07)	0.157	0.343
IgM B1cell	ref	-0.15 (0.07)	0.038	0.125
IgD IgM B1cell	ref	-0.14 (0.07)	0.0529	0.161
IgD Bmem	ref	-0.12 (0.07)	0.101	0.246
IgM Bmem	ref	-0.12 (0.07)	0.0896	0.222
IgD IgM Bmem	ref	-0.11 (0.07)	0.114	0.271
TH1	ref	-0.10 (0.07)	0.151	0.34
TH2	ref	0.10 (0.07)	0.164	0.343
TH17	ref	0.07 (0.07)	0.375	0.544
CD4+TNFa+	ref	0.12 (0.07)	0.0844	0.214
CD4+GRANZYME B+	ref	0.25 (0.05)	2.1e-06	1.92e-05
CD4+PERFORIN+	ref	-0.11 (0.07)	0.132	0.309
CD4+TNFa+IFNg+	ref	-0.09 (0.07)	0.191	0.385
CD4+IL17+IFNg+	ref	0.07 (0.07)	0.318	0.493
Tc1	ref	0.12 (0.07)	0.08	0.214
Tc2	ref	-0.07 (0.07)	0.31	0.492
Tc17	ref	-0.00 (0.07)	0.935	0.935
CD8+TNFa+	ref	0.24 (0.07)	0.000722	0.0039
CD8+Granzyme B+	ref	0.38 (0.06)	6.37e-11	2.53e-09
CD8+PERFORIN+	ref	0.16 (0.07)	0.0172	0.0601
CD8+TNFa+IFNg+	ref	0.17 (0.07)	0.0122	0.0454
CD8+IL17+IFNg+	ref	0.05 (0.07)	0.417	0.584
CD8+IL17+IFNg+	ref	-0.01 (0.07)	0.864	0.917
CD4+CD25+	ref	-0.00 (0.07)	0.916	0.924
CD4+CD25+CD127-	ref	0.08 (0.07)	0.279	0.486
CD4+CD25+CD127-Tbet+	ref	0.05 (0.07)	0.465	0.63
CD4+CD25+CD127-Rorgt+	ref	0.09 (0.07)	0.228	0.436
CD4+CD25+CD127-FoxP3+Rorgt+	ref	-0.05 (0.07)	0.483	0.637
CD4+FoxP3+	ref	-0.05 (0.07)	0.476	0.637
CD4 FoxP3 Tregs	ref	-0.08 (0.07)	0.288	0.486
CD4+Tbet+	ref	0.04 (0.07)	0.542	0.679
CD4+Rorgt+	ref	0.02 (0.07)	0.763	0.867
CD4+Tbet+Rorgt+	ref	0.04 (0.07)	0.561	0.695
CD8+CD25+	ref	-0.06 (0.07)	0.424	0.587
CD8+CD25+CD127-	ref	0.07 (0.07)	0.294	0.486
CD8+CD25+CD127-Tbet+	ref	0.10 (0.07)	0.139	0.317
CD8+CD25+CD127-Rorgt+	ref	0.08 (0.07)	0.277	0.486
CD8+FoxP3+	ref	0.03 (0.07)	0.669	0.781
CD8 FoxP3 Tregs	ref	0.08 (0.07)	0.231	0.436
CD8+Tbet+	ref	0.07 (0.07)	0.302	0.486
CD8+Rorgt+	ref	-0.04 (0.07)	0.612	0.736
CD8+Tbet+Rorgt+	ref	0.07 (0.07)	0.332	0.5
CD14 total	ref	0.06 (0.07)	0.417	0.584
CM (Classical Monocytes)	ref	0.02 (0.07)	0.782	0.867
IM (Intermediate Monocytes)	ref	0.00 (0.07)	0.89	0.921
NCM (Non-classical monocytes)	ref	-0.03 (0.07)	0.645	0.76
TREM2+ CM	ref	-0.08 (0.07)	0.295	0.486
Slan+ CM	ref	0.10 (0.07)	0.163	0.343
CD33+ CM	ref	-0.05 (0.07)	0.525	0.664
CD163+ CM	ref	-0.13 (0.07)	0.0799	0.214
TREM2+ IM	ref	-0.07 (0.07)	0.35	0.514
Slan+ IM	ref	0.04 (0.07)	0.609	0.736
CD33+ IM	ref	-0.06 (0.07)	0.382	0.548
CD163+ IM	ref	-0.05 (0.07)	0.487	0.637
TREM2+ NCM	ref	-0.02 (0.07)	0.697	0.805
CD87+ NCM	ref	-0.00 (0.06)	0.794	0.867
CCR2+ NCM	ref	0.07 (0.07)	0.347	0.514
Slan+ NCM	ref	-0.02 (0.07)	0.767	0.867
CD33+ NCM	ref	-0.08 (0.07)	0.266	0.48
CD163+ NCM	ref	-0.13 (0.07)	0.0835	0.214
CD4/CD8	ref	-0.41 (0.06)	4.44e-10	1.32e-08
CD4 Tn/Tm	ref	-0.19 (0.07)	0.00632	0.0268
CD8 Tn/Tm	ref	-0.41 (0.06)	1.6e-12	1.91e-10
CMV levels were log-transformed; immune cell phenotypes were inverse normal transformed. Models were fitted for 10 imputed datasets; effect estimates, and p-values were pooled over the 10 fitted models. FDRs were calculated on the pooled p-values b.
