# Supplementary material for: Circulating immune cell phenotypes are associated with age, sex, CMV, and smoking status in the Framingham Heart Study offspring participants
Source: Aging (Albany NY). 2023 Apr 27;15(10):3939–66. doi: 10.18632/aging.204686 (PMC10258017; doi:10.18632/aging.204686)
Supplement: Supplementary Table 8 [file aging-15-204686-s009.xlsx]

## Sheet: Sheet1
Supplementary Table 8. Immune cell phenotype distributions between current non-smokers and smokers at exam 7 adjusted for all Model 2 covariates a using multiple imputations.
Cell types	Current non-smoker (n=857)	Current smoker (n=139)	p	FDR		Number of significant
T cells	ref	0.10 (0.09)	0.296	0.534		20
T helper cells	ref	-0.04 (0.09)	0.664	0.824
CD4+CD45RA+	ref	-0.06 (0.09)	0.524	0.734		a. Model 2 covariates include age, sex, CMV status, education level, APOE genotypes, BMI groups, and indicators of smoking, presence of diabetes, prevalent CVD, prevalent AF, SBP, on hypertension treatment at exam 7, TC, HDL, on lipid treatment at exam 7, and cancer prior to exam 7. CMV was treated as linear with participants whose CMV above LOD was set as a fixed value above the LOD. b. The thre…
CD4+CD45RO+	ref	0.04 (0.09)	0.7	0.844
CD4+CD28-	ref	0.12 (0.08)	0.137	0.338
CD4+CD57+	ref	0.11 (0.07)	0.159	0.374
CD4+CD95+	ref	0.13 (0.09)	0.171	0.379
CD4+CD127+	ref	-0.28 (0.09)	0.00258	0.0233
CD4+CD137+	ref	-0.08 (0.09)	0.378	0.584
CD4+CD27-	ref	0.11 (0.09)	0.215	0.441
CD4+PD1+	ref	-0.21 (0.09)	0.0254	0.0889
CD4+CD28-CD57+	ref	0.06 (0.07)	0.413	0.622
CD4+CD28-CD27-	ref	0.13 (0.07)	0.0865	0.251
CD4 ED (early differentiated)	ref	0.02 (0.09)	0.799	0.866
CD4 ID (intermediate differentiated)	ref	0.09 (0.08)	0.26	0.5
CD4+ TEMRA	ref	0.07 (0.07)	0.343	0.561
CD4 Tn (naïve)	ref	-0.07 (0.09)	0.453	0.67
CD4 Tint (intermediate memory)	ref	0.05 (0.09)	0.607	0.785
CD4 Teff (effector)	ref	0.02 (0.08)	0.806	0.866
CD4 Tcm (central memory)	ref	0.14 (0.09)	0.124	0.328
CD4 Ttm (transitional memory)	ref	-0.09 (0.09)	0.343	0.561
CD4 Tem (effector memory)	ref	-0.10 (0.09)	0.258	0.5
Cytotoxic T cells	ref	0.12 (0.08)	0.139	0.338
CD8+CD45RA+	ref	-0.23 (0.09)	0.0136	0.0602
CD8+CD45RO+	ref	0.11 (0.09)	0.214	0.441
CD8+CD28-	ref	-0.22 (0.07)	0.00337	0.0267
CD8+CD57+	ref	-0.20 (0.08)	0.0075	0.0451
CD8+CD95+	ref	0.22 (0.09)	0.0199	0.0765
CD8+CD127+	ref	0.00 (0.09)	0.948	0.956
CD8+CD137+	ref	0.00 (0.09)	0.943	0.956
CD8+CD27-	ref	-0.02 (0.07)	0.84	0.884
CD8+PD1+	ref	-0.17 (0.09)	0.0774	0.23
CD8+CD28-CD57+	ref	-0.20 (0.07)	0.00759	0.0451
CD8+CD28-CD27-	ref	-0.18 (0.07)	0.0118	0.057
CD8 ED (early differentiated)	ref	0.03 (0.09)	0.765	0.866
CD8 ID (intermediate differentiated)	ref	-0.08 (0.09)	0.371	0.581
CD8+ TEMRA	ref	-0.24 (0.08)	0.00274	0.0233
CD8 Tn (naïve)	ref	-0.04 (0.08)	0.558	0.763
CD8 Tint (intermediate memory)	ref	-0.07 (0.09)	0.487	0.706
CD8 Teff (effector)	ref	-0.18 (0.08)	0.022	0.082
CD8 Tcm (central memory)	ref	0.18 (0.09)	0.0417	0.138
CD8 Ttm (transitional memory)	ref	-0.09 (0.09)	0.319	0.549
CD8 Tem (effector memory)	ref	0.05 (0.09)	0.591	0.777
B cells	ref	0.02 (0.09)	0.834	0.884
gd T cells (gamma delta T cells)	ref	-0.09 (0.09)	0.323	0.549
Natural Killer (NK) cells	ref	-0.24 (0.09)	0.00895	0.0505
CD38+ T cells	ref	-0.24 (0.09)	0.0121	0.057
HLA-DR+ T cells	ref	0.02 (0.09)	0.808	0.866
CD38+HLADR+ T cells	ref	-0.28 (0.09)	0.00265	0.0233
IgD B cells	ref	-0.36 (0.09)	0.000163	0.00276
IgM B cells	ref	-0.38 (0.09)	5.39e-05	0.0016
IgDIgM Bcells	ref	-0.33 (0.09)	0.000428	0.00565
CD43+ B cells	ref	-0.18 (0.09)	0.0654	0.2
CD27+ B cells	ref	0.34 (0.09)	0.000355	0.00528
B1 cells	ref	0.03 (0.09)	0.741	0.857
Memory B cells (Bmem)	ref	0.37 (0.09)	0.000133	0.00264
IgD B1cell	ref	-0.24 (0.09)	0.00998	0.0516
IgM B1cell	ref	-0.24 (0.09)	0.0151	0.0641
IgD IgM B1cell	ref	-0.22 (0.09)	0.0181	0.0731
IgD Bmem	ref	-0.44 (0.09)	2.29e-06	9.08e-05
IgM Bmem	ref	-0.59 (0.09)	4.14e-10	4.93e-08
IgD IgM Bmem	ref	-0.48 (0.09)	4e-07	2.38e-05
TH1	ref	-0.12 (0.09)	0.161	0.374
TH2	ref	0.15 (0.09)	0.104	0.288
TH17	ref	-0.18 (0.09)	0.058	0.186
CD4+TNFa+	ref	0.13 (0.09)	0.173	0.379
CD4+GRANZYME B+	ref	-0.03 (0.07)	0.678	0.832
CD4+PERFORIN+	ref	-0.10 (0.09)	0.285	0.53
CD4+TNFa+IFNg+	ref	-0.02 (0.09)	0.787	0.866
CD4+IL17+IFNg+	ref	-0.02 (0.09)	0.788	0.866
Tc1	ref	-0.35 (0.09)	9.67e-05	0.0023
Tc2	ref	0.03 (0.09)	0.737	0.857
Tc17	ref	-0.13 (0.09)	0.175	0.379
CD8+TNFa+	ref	0.26 (0.09)	0.0049	0.0343
CD8+Granzyme B+	ref	-0.21 (0.07)	0.00453	0.0337
CD8+PERFORIN+	ref	-0.18 (0.09)	0.0379	0.129
CD8+TNFa+IFNg+	ref	-0.20 (0.09)	0.0254	0.0889
CD8+IL17+IFNg+	ref	-0.14 (0.09)	0.0948	0.269
CD8+IL17+IFNg+	ref	-0.12 (0.09)	0.163	0.374
CD4+CD25+	ref	-0.09 (0.09)	0.347	0.561
CD4+CD25+CD127-	ref	-0.08 (0.09)	0.4	0.61
CD4+CD25+CD127-Tbet+	ref	0.03 (0.09)	0.777	0.866
CD4+CD25+CD127-Rorgt+	ref	-0.10 (0.09)	0.29	0.53
CD4+CD25+CD127-FoxP3+Rorgt+	ref	0.05 (0.09)	0.614	0.785
CD4+FoxP3+	ref	0.23 (0.09)	0.0124	0.057
CD4 FoxP3 Tregs	ref	0.09 (0.09)	0.349	0.561
CD4+Tbet+	ref	-0.00 (0.09)	0.959	0.959
CD4+Rorgt+	ref	-0.22 (0.09)	0.0184	0.0731
CD4+Tbet+Rorgt+	ref	-0.01 (0.09)	0.879	0.902
CD8+CD25+	ref	-0.09 (0.09)	0.363	0.576
CD8+CD25+CD127-	ref	-0.24 (0.09)	0.00933	0.0505
CD8+CD25+CD127-Tbet+	ref	-0.16 (0.09)	0.0643	0.2
CD8+CD25+CD127-Rorgt+	ref	-0.25 (0.09)	0.00723	0.0451
CD8+FoxP3+	ref	0.14 (0.09)	0.123	0.328
CD8 FoxP3 Tregs	ref	0.28 (0.09)	0.00152	0.0165
CD8+Tbet+	ref	-0.03 (0.09)	0.742	0.857
CD8+Rorgt+	ref	-0.06 (0.09)	0.512	0.734
CD8+Tbet+Rorgt+	ref	-0.04 (0.09)	0.646	0.818
CD14 total	ref	0.33 (0.09)	0.000605	0.0072
CM (Classical Monocytes)	ref	-0.14 (0.09)	0.136	0.338
IM (Intermediate Monocytes)	ref	0.14 (0.09)	0.138	0.338
NCM (Non-classical monocytes)	ref	0.04 (0.09)	0.658	0.824
TREM2+ CM	ref	-0.06 (0.09)	0.518	0.734
Slan+ CM	ref	0.04 (0.09)	0.705	0.844
CD33+ CM	ref	-0.12 (0.09)	0.211	0.441
CD163+ CM	ref	0.02 (0.09)	0.709	0.844
TREM2+ IM	ref	-0.09 (0.09)	0.321	0.549
Slan+ IM	ref	0.05 (0.09)	0.572	0.765
CD33+ IM	ref	-0.10 (0.09)	0.275	0.519
CD163+ IM	ref	0.07 (0.09)	0.456	0.67
TREM2+ NCM	ref	-0.11 (0.09)	0.238	0.48
CD87+ NCM	ref	-0.05 (0.08)	0.553	0.763
CCR2+ NCM	ref	0.05 (0.09)	0.571	0.765
Slan+ NCM	ref	0.01 (0.09)	0.858	0.887
CD33+ NCM	ref	-0.11 (0.09)	0.252	0.5
CD163+ NCM	ref	0.05 (0.09)	0.594	0.777
CD4/CD8	ref	-0.08 (0.08)	0.308	0.547
CD4 Tn/Tm	ref	-0.02 (0.09)	0.795	0.866
CD8 Tn/Tm	ref	0.01 (0.07)	0.855	0.887
CMV levels were log-transformed; immune cell phenotypes were inverse normal transformed. Models were fitted for 10 imputed datasets; effect estimates, and p-values were pooled over the 10 fitted models. FDRs were calculated on the pooled p-values b.
