# Supplementary material for: Circulating immune cell phenotypes are associated with age, sex, CMV, and smoking status in the Framingham Heart Study offspring participants
Source: Aging (Albany NY). 2023 Apr 27;15(10):3939–66. doi: 10.18632/aging.204686 (PMC10258017; doi:10.18632/aging.204686)
Supplement: Supplementary Table 9 [file aging-15-204686-s010.xlsx]

## Sheet: Sheet1
Supplementary Table 9. Immune cell phenotype distributions across education level groups adjusted for all Model 2 covariates a using multiple imputations.
Cell types	Attended high school	High school graduate	Attended college	College graduate	p	FDR		a. Model 2 covariates include age, sex, CMV status, education level, APOE genotypes, BMI groups, and indicators of smoking, presence of diabetes, prevalent CVD, prevalent AF, SBP, on hypertension treatment at exam 7, TC, HDL, on lipid treatment at exam 7, and cancer prior to exam 7. CMV was treated as linear with participants whose CMV above LOD was set as a fixed value above the LOD. b. The thre…
T cells	ref	-0.28 (0.17)	-0.27 (0.17)	-0.22 (0.17)	0.384	0.823
T helper cells	ref	0.20 (0.16)	0.15 (0.16)	0.11 (0.16)	0.498	0.861
CD4+CD45RA+	ref	-0.15 (0.17)	-0.09 (0.17)	-0.09 (0.17)	0.755	0.917
CD4+CD45RO+	ref	0.10 (0.18)	0.04 (0.17)	0.06 (0.17)	0.85	0.917
CD4+CD28-	ref	0.02 (0.15)	-0.00 (0.15)	0.02 (0.15)	0.974	0.974
CD4+CD57+	ref	-0.18 (0.14)	-0.20 (0.14)	-0.08 (0.14)	0.127	0.6
CD4+CD95+	ref	-0.21 (0.18)	-0.15 (0.18)	-0.20 (0.17)	0.61	0.917
CD4+CD127+	ref	-0.16 (0.18)	-0.15 (0.18)	-0.14 (0.17)	0.817	0.917
CD4+CD137+	ref	0.16 (0.18)	0.14 (0.18)	0.17 (0.17)	0.791	0.917
CD4+CD27-	ref	-0.03 (0.16)	0.01 (0.16)	-0.01 (0.16)	0.954	0.974
CD4+PD1+	ref	0.15 (0.18)	0.17 (0.18)	0.06 (0.18)	0.442	0.861
CD4+CD28-CD57+	ref	0.00 (0.13)	0.01 (0.13)	0.08 (0.13)	0.499	0.861
CD4+CD28-CD27-	ref	-0.05 (0.14)	0.01 (0.14)	0.02 (0.14)	0.735	0.917
CD4 ED (early differentiated)	ref	0.17 (0.18)	0.10 (0.18)	0.13 (0.18)	0.734	0.917
CD4 ID (intermediate differentiated)	ref	0.15 (0.15)	0.09 (0.15)	0.13 (0.15)	0.703	0.917
CD4+ TEMRA	ref	-0.07 (0.14)	-0.10 (0.14)	0.01 (0.14)	0.308	0.823
CD4 Tn (naïve)	ref	-0.10 (0.17)	-0.03 (0.17)	-0.04 (0.17)	0.806	0.917
CD4 Tint (intermediate memory)	ref	-0.13 (0.18)	-0.28 (0.17)	-0.20 (0.17)	0.236	0.702
CD4 Teff (effector)	ref	-0.20 (0.15)	-0.23 (0.15)	-0.18 (0.15)	0.471	0.861
CD4 Tcm (central memory)	ref	0.03 (0.18)	-0.00 (0.18)	-0.01 (0.17)	0.939	0.972
CD4 Ttm (transitional memory)	ref	0.26 (0.18)	0.12 (0.18)	0.21 (0.18)	0.278	0.769
CD4 Tem (effector memory)	ref	0.03 (0.17)	0.02 (0.16)	0.05 (0.16)	0.959	0.974
Cytotoxic T cells	ref	-0.15 (0.16)	-0.11 (0.15)	-0.01 (0.15)	0.212	0.701
CD8+CD45RA+	ref	0.01 (0.17)	-0.08 (0.17)	0.10 (0.17)	0.0951	0.526
CD8+CD45RO+	ref	-0.11 (0.17)	-0.09 (0.17)	-0.19 (0.17)	0.475	0.861
CD8+CD28-	ref	-0.03 (0.14)	0.01 (0.14)	0.14 (0.14)	0.046	0.406
CD8+CD57+	ref	-0.05 (0.14)	0.05 (0.14)	0.12 (0.14)	0.105	0.544
CD8+CD95+	ref	-0.14 (0.18)	-0.13 (0.18)	-0.07 (0.17)	0.714	0.917
CD8+CD127+	ref	-0.06 (0.16)	-0.05 (0.16)	-0.23 (0.16)	0.0263	0.347
CD8+CD137+	ref	-0.06 (0.18)	-0.14 (0.17)	-0.09 (0.17)	0.708	0.917
CD8+CD27-	ref	0.05 (0.14)	0.11 (0.14)	0.18 (0.14)	0.169	0.65
CD8+PD1+	ref	0.17 (0.18)	0.20 (0.18)	0.09 (0.17)	0.418	0.858
CD8+CD28-CD57+	ref	0.05 (0.14)	0.12 (0.14)	0.22 (0.14)	0.043	0.406
CD8+CD28-CD27-	ref	0.03 (0.14)	0.08 (0.13)	0.22 (0.13)	0.0119	0.284
CD8 ED (early differentiated)	ref	-0.18 (0.17)	-0.24 (0.16)	-0.28 (0.16)	0.255	0.722
CD8 ID (intermediate differentiated)	ref	-0.26 (0.17)	-0.21 (0.17)	-0.21 (0.16)	0.466	0.861
CD8+ TEMRA	ref	-0.06 (0.15)	-0.05 (0.15)	0.15 (0.15)	0.00622	0.284
CD8 Tn (naïve)	ref	0.16 (0.14)	0.07 (0.14)	0.08 (0.14)	0.52	0.87
CD8 Tint (intermediate memory)	ref	-0.24 (0.18)	-0.28 (0.17)	-0.18 (0.17)	0.33	0.823
CD8 Teff (effector)	ref	-0.02 (0.15)	-0.04 (0.14)	0.17 (0.14)	0.00504	0.284
CD8 Tcm (central memory)	ref	-0.21 (0.17)	-0.27 (0.17)	-0.36 (0.17)	0.068	0.426
CD8 Ttm (transitional memory)	ref	-0.16 (0.17)	-0.16 (0.17)	-0.18 (0.17)	0.739	0.917
CD8 Tem (effector memory)	ref	0.12 (0.18)	0.15 (0.18)	0.13 (0.17)	0.863	0.917
B cells	ref	0.23 (0.18)	0.13 (0.17)	0.11 (0.17)	0.365	0.823
gd T cells (gamma delta T cells)	ref	-0.17 (0.18)	-0.20 (0.17)	-0.23 (0.17)	0.597	0.912
Natural Killer (NK) cells	ref	0.02 (0.17)	-0.01 (0.17)	-0.07 (0.17)	0.758	0.917
CD38+ T cells	ref	0.26 (0.18)	0.24 (0.18)	0.23 (0.18)	0.54	0.88
HLA-DR+ T cells	ref	-0.40 (0.18)	-0.33 (0.17)	-0.51 (0.17)	0.00887	0.284
CD38+HLADR+ T cells	ref	-0.10 (0.18)	-0.12 (0.17)	-0.24 (0.17)	0.232	0.702
IgD B cells	ref	0.15 (0.18)	0.24 (0.17)	0.15 (0.17)	0.376	0.823
IgM B cells	ref	0.19 (0.18)	0.23 (0.17)	0.22 (0.17)	0.581	0.912
IgDIgM Bcells	ref	0.15 (0.18)	0.26 (0.17)	0.16 (0.17)	0.343	0.823
CD43+ B cells	ref	-0.30 (0.18)	-0.26 (0.18)	-0.30 (0.18)	0.362	0.823
CD27+ B cells	ref	0.00 (0.18)	-0.11 (0.18)	-0.05 (0.18)	0.588	0.912
B1 cells	ref	-0.17 (0.18)	-0.20 (0.18)	-0.21 (0.18)	0.646	0.917
Memory B cells (Bmem)	ref	0.07 (0.18)	-0.07 (0.17)	0.00 (0.17)	0.464	0.861
IgD B1cell	ref	0.03 (0.17)	-0.02 (0.17)	0.01 (0.17)	0.918	0.959
IgM B1cell	ref	-0.13 (0.18)	-0.19 (0.17)	-0.04 (0.17)	0.224	0.702
IgD IgM B1cell	ref	-0.04 (0.17)	-0.07 (0.17)	0.05 (0.17)	0.397	0.829
IgD Bmem	ref	-0.07 (0.18)	-0.07 (0.17)	-0.03 (0.17)	0.908	0.956
IgM Bmem	ref	-0.11 (0.17)	-0.05 (0.17)	-0.09 (0.17)	0.822	0.917
IgD IgM Bmem	ref	-0.11 (0.17)	-0.08 (0.17)	-0.04 (0.17)	0.761	0.917
TH1	ref	-0.01 (0.16)	-0.00 (0.16)	0.19 (0.16)	0.0208	0.309
TH2	ref	-0.09 (0.18)	-0.13 (0.17)	-0.18 (0.17)	0.593	0.912
TH17	ref	-0.00 (0.18)	-0.00 (0.18)	0.07 (0.18)	0.69	0.917
CD4+TNFa+	ref	-0.07 (0.18)	-0.15 (0.18)	0.01 (0.17)	0.206	0.701
CD4+GRANZYME B+	ref	0.09 (0.13)	0.08 (0.13)	0.18 (0.13)	0.197	0.701
CD4+PERFORIN+	ref	-0.06 (0.18)	-0.05 (0.17)	-0.05 (0.17)	0.973	0.974
CD4+TNFa+IFNg+	ref	0.02 (0.17)	-0.01 (0.17)	0.19 (0.16)	0.0334	0.397
CD4+IL17+IFNg+	ref	-0.02 (0.18)	-0.05 (0.17)	0.06 (0.17)	0.526	0.87
Tc1	ref	-0.09 (0.17)	-0.11 (0.17)	0.11 (0.17)	0.0145	0.284
Tc2	ref	-0.16 (0.18)	-0.12 (0.18)	-0.23 (0.18)	0.351	0.823
Tc17	ref	0.04 (0.18)	0.11 (0.17)	0.16 (0.17)	0.495	0.861
CD8+TNFa+	ref	0.03 (0.17)	0.01 (0.17)	0.09 (0.17)	0.705	0.917
CD8+Granzyme B+	ref	-0.00 (0.14)	0.01 (0.14)	0.13 (0.14)	0.131	0.6
CD8+PERFORIN+	ref	0.06 (0.17)	0.05 (0.17)	0.19 (0.16)	0.187	0.695
CD8+TNFa+IFNg+	ref	-0.04 (0.17)	-0.06 (0.17)	0.11 (0.17)	0.0746	0.444
CD8+IL17+IFNg+	ref	0.22 (0.16)	0.07 (0.16)	0.19 (0.16)	0.14	0.615
CD8+IL17+IFNg+	ref	0.31 (0.17)	0.14 (0.16)	0.27 (0.16)	0.0599	0.406
CD4+CD25+	ref	-0.18 (0.18)	-0.16 (0.18)	-0.24 (0.18)	0.473	0.861
CD4+CD25+CD127-	ref	-0.02 (0.18)	0.04 (0.18)	-0.05 (0.18)	0.694	0.917
CD4+CD25+CD127-Tbet+	ref	-0.10 (0.18)	0.00 (0.17)	-0.05 (0.17)	0.705	0.917
CD4+CD25+CD127-Rorgt+	ref	-0.00 (0.18)	0.05 (0.18)	-0.03 (0.18)	0.782	0.917
CD4+CD25+CD127-FoxP3+Rorgt+	ref	0.17 (0.17)	0.15 (0.17)	0.20 (0.17)	0.675	0.917
CD4+FoxP3+	ref	0.12 (0.18)	0.09 (0.17)	0.13 (0.17)	0.845	0.917
CD4 FoxP3 Tregs	ref	0.09 (0.18)	0.11 (0.17)	0.13 (0.17)	0.849	0.917
CD4+Tbet+	ref	-0.30 (0.18)	-0.21 (0.18)	-0.27 (0.17)	0.331	0.823
CD4+Rorgt+	ref	-0.19 (0.18)	-0.17 (0.18)	-0.29 (0.18)	0.232	0.702
CD4+Tbet+Rorgt+	ref	-0.29 (0.18)	-0.20 (0.18)	-0.26 (0.17)	0.367	0.823
CD8+CD25+	ref	-0.28 (0.18)	-0.29 (0.18)	-0.42 (0.18)	0.0591	0.406
CD8+CD25+CD127-	ref	-0.14 (0.17)	-0.08 (0.17)	-0.13 (0.17)	0.777	0.917
CD8+CD25+CD127-Tbet+	ref	-0.21 (0.17)	-0.11 (0.17)	-0.14 (0.17)	0.52	0.87
CD8+CD25+CD127-Rorgt+	ref	-0.08 (0.17)	-0.03 (0.17)	-0.08 (0.17)	0.856	0.917
CD8+FoxP3+	ref	0.09 (0.17)	0.03 (0.17)	-0.02 (0.17)	0.591	0.912
CD8 FoxP3 Tregs	ref	0.21 (0.17)	0.06 (0.17)	0.07 (0.17)	0.253	0.722
CD8+Tbet+	ref	-0.33 (0.17)	-0.25 (0.17)	-0.36 (0.17)	0.129	0.6
CD8+Rorgt+	ref	-0.14 (0.18)	-0.15 (0.18)	-0.29 (0.18)	0.0973	0.526
CD8+Tbet+Rorgt+	ref	-0.29 (0.17)	-0.20 (0.17)	-0.32 (0.17)	0.162	0.65
CD14 total	ref	0.08 (0.18)	0.02 (0.18)	0.00 (0.17)	0.789	0.917
CM (Classical Monocytes)	ref	0.35 (0.18)	0.14 (0.18)	0.08 (0.17)	0.0112	0.284
IM (Intermediate Monocytes)	ref	-0.32 (0.18)	-0.15 (0.18)	-0.12 (0.18)	0.061	0.406
NCM (Non-classical monocytes)	ref	-0.29 (0.18)	-0.13 (0.18)	-0.08 (0.18)	0.0613	0.406
TREM2+ CM	ref	-0.45 (0.18)	-0.48 (0.18)	-0.41 (0.17)	0.0571	0.406
Slan+ CM	ref	-0.16 (0.18)	-0.26 (0.18)	-0.21 (0.17)	0.387	0.823
CD33+ CM	ref	0.06 (0.18)	0.10 (0.17)	0.10 (0.17)	0.854	0.917
CD163+ CM	ref	-0.09 (0.18)	-0.16 (0.17)	-0.20 (0.17)	0.451	0.861
TREM2+ IM	ref	-0.38 (0.17)	-0.37 (0.17)	-0.31 (0.17)	0.15	0.637
Slan+ IM	ref	-0.15 (0.18)	-0.21 (0.18)	-0.18 (0.17)	0.641	0.917
CD33+ IM	ref	0.11 (0.18)	0.16 (0.17)	0.14 (0.17)	0.758	0.917
CD163+ IM	ref	-0.00 (0.18)	-0.09 (0.18)	-0.06 (0.17)	0.696	0.917
TREM2+ NCM	ref	-0.45 (0.17)	-0.48 (0.17)	-0.40 (0.17)	0.0483	0.406
CD87+ NCM	ref	0.04 (0.15)	0.12 (0.15)	0.25 (0.15)	0.0167	0.284
CCR2+ NCM	ref	-0.11 (0.18)	0.05 (0.17)	-0.03 (0.17)	0.315	0.823
Slan+ NCM	ref	-0.25 (0.18)	-0.35 (0.17)	-0.33 (0.17)	0.206	0.701
CD33+ NCM	ref	0.16 (0.17)	0.18 (0.17)	0.18 (0.17)	0.69	0.917
CD163+ NCM	ref	0.02 (0.18)	-0.17 (0.18)	-0.04 (0.17)	0.168	0.65
CD4/CD8	ref	0.18 (0.16)	0.14 (0.16)	0.06 (0.15)	0.333	0.823
CD4 Tn/Tm	ref	-0.04 (0.17)	0.03 (0.17)	0.01 (0.17)	0.843	0.917
CD8 Tn/Tm	ref	0.12 (0.14)	0.05 (0.14)	0.02 (0.14)	0.478	0.861
CMV levels were log-transformed; immune cell phenotypes were inverse normal transformed. Models were fitted for 10 imputed datasets; effect estimates, and p-values were pooled over the 10 fitted models. FDRs were calculated on the pooled p-values b.
