# Supplementary material for: Circulating immune cell phenotypes are associated with age, sex, CMV, and smoking status in the Framingham Heart Study offspring participants
Source: Aging (Albany NY). 2023 Apr 27;15(10):3939–66. doi: 10.18632/aging.204686 (PMC10258017; doi:10.18632/aging.204686)
Supplement: Supplementary Table 10 [file aging-15-204686-s011.xlsx]

## Sheet: Sheet1
Supplementary Table 10. Immune cell phenotype distributions across APOE genotype groups adjusted for all Model 2 covariates a using multiple imputations.
Cell types	E3E3	E2 carriers	E4 carriers	p	FDR		a. Model 2 covariates include age, sex, CMV status, education level, APOE genotypes, BMI groups, and indicators of smoking, presence of diabetes, prevalent CVD, prevalent AF, SBP, on hypertension treatment at exam 7, TC, HDL, on lipid treatment at exam 7, and cancer prior to exam 7. CMV was treated as linear with participants whose CMV above LOD was set as a fixed value above the LOD. b. The thre…
T cells	ref	0.09 (0.10)	0.14 (0.08)	0.185	0.891
T helper cells	ref	0.04 (0.09)	0.08 (0.07)	0.551	0.891
CD4+CD45RA+	ref	-0.08 (0.10)	0.07 (0.08)	0.435	0.891
CD4+CD45RO+	ref	0.03 (0.10)	-0.06 (0.08)	0.655	0.891
CD4+CD28-	ref	0.09 (0.09)	0.05 (0.07)	0.509	0.891
CD4+CD57+	ref	0.12 (0.08)	0.05 (0.06)	0.271	0.891
CD4+CD95+	ref	-0.06 (0.10)	-0.05 (0.08)	0.71	0.891
CD4+CD127+	ref	0.04 (0.10)	0.03 (0.08)	0.854	0.891
CD4+CD137+	ref	-0.20 (0.10)	0.02 (0.08)	0.13	0.891
CD4+CD27-	ref	0.05 (0.09)	-0.02 (0.07)	0.768	0.891
CD4+PD1+	ref	-0.15 (0.10)	-0.12 (0.08)	0.158	0.891
CD4+CD28-CD57+	ref	0.13 (0.07)	0.04 (0.06)	0.196	0.891
CD4+CD28-CD27-	ref	0.10 (0.08)	0.06 (0.06)	0.318	0.891
CD4 ED (early differentiated)	ref	0.03 (0.10)	-0.01 (0.08)	0.887	0.91
CD4 ID (intermediate differentiated)	ref	0.18 (0.08)	0.15 (0.07)	0.0199	0.891
CD4+ TEMRA	ref	0.16 (0.08)	0.06 (0.06)	0.111	0.891
CD4 Tn (naïve)	ref	-0.07 (0.10)	0.07 (0.08)	0.402	0.891
CD4 Tint (intermediate memory)	ref	0.04 (0.10)	0.08 (0.08)	0.554	0.891
CD4 Teff (effector)	ref	0.11 (0.08)	0.03 (0.07)	0.447	0.891
CD4 Tcm (central memory)	ref	0.04 (0.10)	-0.06 (0.08)	0.651	0.891
CD4 Ttm (transitional memory)	ref	0.03 (0.10)	0.04 (0.08)	0.833	0.891
CD4 Tem (effector memory)	ref	0.06 (0.09)	-0.06 (0.07)	0.541	0.891
Cytotoxic T cells	ref	0.04 (0.09)	0.07 (0.07)	0.581	0.891
CD8+CD45RA+	ref	-0.08 (0.10)	0.03 (0.08)	0.623	0.891
CD8+CD45RO+	ref	0.11 (0.10)	-0.02 (0.08)	0.455	0.891
CD8+CD28-	ref	-0.07 (0.08)	-0.02 (0.06)	0.635	0.891
CD8+CD57+	ref	-0.06 (0.08)	-0.03 (0.07)	0.682	0.891
CD8+CD95+	ref	0.16 (0.10)	0.00 (0.08)	0.289	0.891
CD8+CD127+	ref	0.08 (0.09)	-0.08 (0.07)	0.317	0.891
CD8+CD137+	ref	-0.25 (0.10)	0.02 (0.08)	0.0352	0.891
CD8+CD27-	ref	0.05 (0.08)	-0.02 (0.06)	0.749	0.891
CD8+PD1+	ref	-0.10 (0.10)	-0.09 (0.08)	0.386	0.891
CD8+CD28-CD57+	ref	-0.07 (0.08)	-0.02 (0.06)	0.647	0.891
CD8+CD28-CD27-	ref	0.00 (0.08)	-0.02 (0.06)	0.933	0.941
CD8 ED (early differentiated)	ref	0.13 (0.09)	-0.00 (0.08)	0.388	0.891
CD8 ID (intermediate differentiated)	ref	-0.11 (0.09)	0.10 (0.08)	0.166	0.891
CD8+ TEMRA	ref	-0.08 (0.08)	-0.01 (0.07)	0.606	0.891
CD8 Tn (naïve)	ref	-0.03 (0.08)	-0.02 (0.06)	0.874	0.905
CD8 Tint (intermediate memory)	ref	-0.15 (0.10)	-0.06 (0.08)	0.303	0.891
CD8 Teff (effector)	ref	-0.04 (0.08)	-0.03 (0.07)	0.797	0.891
CD8 Tcm (central memory)	ref	0.15 (0.09)	-0.05 (0.08)	0.193	0.891
CD8 Ttm (transitional memory)	ref	0.01 (0.09)	0.06 (0.08)	0.72	0.891
CD8 Tem (effector memory)	ref	0.01 (0.10)	-0.04 (0.08)	0.816	0.891
B cells	ref	0.05 (0.10)	-0.09 (0.08)	0.409	0.891
gd T cells (gamma delta T cells)	ref	0.07 (0.10)	-0.02 (0.08)	0.68	0.891
Natural Killer (NK) cells	ref	0.03 (0.10)	-0.04 (0.08)	0.787	0.891
CD38+ T cells	ref	0.08 (0.10)	0.08 (0.08)	0.497	0.891
HLA-DR+ T cells	ref	0.18 (0.10)	0.05 (0.08)	0.175	0.891
CD38+HLADR+ T cells	ref	0.15 (0.10)	0.10 (0.08)	0.179	0.891
IgD B cells	ref	0.17 (0.10)	0.02 (0.08)	0.223	0.891
IgM B cells	ref	0.08 (0.10)	-0.01 (0.08)	0.675	0.891
IgDIgM Bcells	ref	0.18 (0.10)	0.01 (0.08)	0.216	0.891
CD43+ B cells	ref	-0.16 (0.10)	0.01 (0.08)	0.278	0.891
CD27+ B cells	ref	0.04 (0.10)	-0.09 (0.08)	0.414	0.891
B1 cells	ref	-0.15 (0.10)	-0.03 (0.08)	0.31	0.891
Memory B cells (Bmem)	ref	0.14 (0.10)	-0.13 (0.08)	0.0738	0.891
IgD B1cell	ref	0.18 (0.10)	-0.01 (0.08)	0.169	0.891
IgM B1cell	ref	0.09 (0.10)	-0.03 (0.08)	0.545	0.891
IgD IgM B1cell	ref	0.13 (0.09)	0.02 (0.08)	0.371	0.891
IgD Bmem	ref	0.17 (0.10)	-0.01 (0.08)	0.199	0.891
IgM Bmem	ref	0.12 (0.10)	-0.01 (0.08)	0.446	0.891
IgD IgM Bmem	ref	0.19 (0.10)	-0.02 (0.08)	0.143	0.891
TH1	ref	0.15 (0.09)	0.00 (0.07)	0.263	0.891
TH2	ref	-0.05 (0.10)	-0.02 (0.08)	0.814	0.891
TH17	ref	0.00 (0.10)	0.05 (0.08)	0.836	0.891
CD4+TNFa+	ref	-0.08 (0.10)	0.01 (0.08)	0.709	0.891
CD4+GRANZYME B+	ref	0.12 (0.07)	0.04 (0.06)	0.246	0.891
CD4+PERFORIN+	ref	0.16 (0.10)	0.02 (0.08)	0.254	0.891
CD4+TNFa+IFNg+	ref	0.07 (0.09)	0.01 (0.08)	0.733	0.891
CD4+IL17+IFNg+	ref	0.02 (0.10)	-0.04 (0.08)	0.847	0.891
Tc1	ref	0.08 (0.09)	0.05 (0.08)	0.608	0.891
Tc2	ref	-0.00 (0.10)	0.01 (0.08)	0.956	0.956
Tc17	ref	-0.13 (0.10)	0.01 (0.08)	0.413	0.891
CD8+TNFa+	ref	-0.04 (0.10)	0.11 (0.08)	0.308	0.891
CD8+Granzyme B+	ref	-0.08 (0.08)	-0.05 (0.06)	0.527	0.891
CD8+PERFORIN+	ref	0.04 (0.09)	-0.04 (0.08)	0.79	0.891
CD8+TNFa+IFNg+	ref	0.00 (0.09)	0.05 (0.08)	0.789	0.891
CD8+IL17+IFNg+	ref	-0.03 (0.09)	0.04 (0.07)	0.75	0.891
CD8+IL17+IFNg+	ref	-0.13 (0.09)	0.04 (0.08)	0.276	0.891
CD4+CD25+	ref	-0.11 (0.10)	0.01 (0.08)	0.525	0.891
CD4+CD25+CD127-	ref	-0.07 (0.10)	0.01 (0.08)	0.743	0.891
CD4+CD25+CD127-Tbet+	ref	0.01 (0.10)	0.05 (0.08)	0.835	0.891
CD4+CD25+CD127-Rorgt+	ref	-0.09 (0.10)	0.01 (0.08)	0.605	0.891
CD4+CD25+CD127-FoxP3+Rorgt+	ref	-0.05 (0.10)	0.03 (0.08)	0.772	0.891
CD4+FoxP3+	ref	-0.12 (0.10)	0.03 (0.08)	0.385	0.891
CD4 FoxP3 Tregs	ref	-0.11 (0.10)	-0.01 (0.08)	0.509	0.891
CD4+Tbet+	ref	-0.08 (0.10)	0.03 (0.08)	0.65	0.891
CD4+Rorgt+	ref	-0.13 (0.10)	-0.04 (0.08)	0.39	0.891
CD4+Tbet+Rorgt+	ref	-0.09 (0.10)	0.03 (0.08)	0.579	0.891
CD8+CD25+	ref	-0.03 (0.10)	0.05 (0.08)	0.715	0.891
CD8+CD25+CD127-	ref	-0.05 (0.10)	0.07 (0.08)	0.493	0.891
CD8+CD25+CD127-Tbet+	ref	-0.06 (0.09)	0.08 (0.08)	0.404	0.891
CD8+CD25+CD127-Rorgt+	ref	-0.09 (0.10)	0.05 (0.08)	0.451	0.891
CD8+FoxP3+	ref	-0.09 (0.09)	-0.08 (0.08)	0.415	0.891
CD8 FoxP3 Tregs	ref	-0.09 (0.09)	-0.02 (0.08)	0.65	0.891
CD8+Tbet+	ref	-0.03 (0.10)	0.04 (0.08)	0.774	0.891
CD8+Rorgt+	ref	-0.08 (0.10)	0.04 (0.08)	0.617	0.891
CD8+Tbet+Rorgt+	ref	-0.06 (0.10)	0.03 (0.08)	0.672	0.891
CD14 total	ref	0.11 (0.10)	-0.06 (0.08)	0.335	0.891
CM (Classical Monocytes)	ref	0.18 (0.10)	-0.03 (0.08)	0.178	0.891
IM (Intermediate Monocytes)	ref	-0.16 (0.10)	-0.00 (0.08)	0.316	0.891
NCM (Non-classical monocytes)	ref	-0.10 (0.10)	0.10 (0.08)	0.249	0.891
TREM2+ CM	ref	-0.08 (0.10)	-0.11 (0.08)	0.376	0.891
Slan+ CM	ref	-0.17 (0.10)	0.08 (0.08)	0.116	0.891
CD33+ CM	ref	0.26 (0.10)	-0.11 (0.08)	0.0116	0.891
CD163+ CM	ref	0.06 (0.10)	-0.11 (0.08)	0.302	0.891
TREM2+ IM	ref	-0.04 (0.10)	-0.05 (0.08)	0.745	0.891
Slan+ IM	ref	-0.09 (0.10)	0.13 (0.08)	0.16	0.891
CD33+ IM	ref	0.23 (0.10)	-0.11 (0.08)	0.0241	0.891
CD163+ IM	ref	0.01 (0.10)	-0.13 (0.08)	0.242	0.891
TREM2+ NCM	ref	0.00 (0.10)	-0.12 (0.08)	0.297	0.891
CD87+ NCM	ref	-0.01 (0.08)	0.06 (0.07)	0.629	0.891
CCR2+ NCM	ref	-0.03 (0.10)	0.03 (0.08)	0.804	0.891
Slan+ NCM	ref	-0.02 (0.10)	0.04 (0.08)	0.799	0.891
CD33+ NCM	ref	0.24 (0.10)	-0.06 (0.08)	0.0472	0.891
CD163+ NCM	ref	0.02 (0.10)	-0.09 (0.08)	0.491	0.891
CD4/CD8	ref	-0.02 (0.09)	-0.02 (0.07)	0.921	0.937
CD4 Tn/Tm	ref	-0.06 (0.09)	0.11 (0.08)	0.23	0.891
CD8 Tn/Tm	ref	-0.04 (0.08)	0.00 (0.06)	0.85	0.891
CMV levels were log-transformed; immune cell phenotypes were inverse normal transformed. Models were fitted for 10 imputed datasets; effect estimates, and p-values were pooled over the 10 fitted models. FDRs were calculated on the pooled p-values b.
