# Supplementary material for: Circulating immune cell phenotypes are associated with age, sex, CMV, and smoking status in the Framingham Heart Study offspring participants
Source: Aging (Albany NY). 2023 Apr 27;15(10):3939–66. doi: 10.18632/aging.204686 (PMC10258017; doi:10.18632/aging.204686)
Supplement: Supplementary Table 11 [file aging-15-204686-s012.xlsx]

## Sheet: Sheet1
Supplementary Table 11. Immune cell phenotype distributions between presence of diabetes or not at exam 7adjusted for all Model 2 covariates a using multiple imputations.
Cell types	No presence of diabetes (n=890)	Presence of diabetes (n=106)	p	FDR		a. Model 2 covariates include age, sex, CMV status, education level, APOE genotypes, BMI groups, and indicators of smoking, presence of diabetes, prevalent CVD, prevalent AF, SBP, on hypertension treatment at exam 7, TC, HDL, on lipid treatment at exam 7, and cancer prior to exam 7. CMV was treated as linear with participants whose CMV above LOD was set as a fixed value above the LOD. b. The thre…
T cells	ref	-0.14 (0.10)	0.188	0.591
T helper cells	ref	-0.09 (0.10)	0.344	0.645
CD4+CD45RA+	ref	-0.27 (0.10)	0.00905	0.16
CD4+CD45RO+	ref	0.27 (0.11)	0.0112	0.16
CD4+CD28-	ref	-0.06 (0.09)	0.484	0.694
CD4+CD57+	ref	-0.05 (0.09)	0.586	0.753
CD4+CD95+	ref	0.32 (0.11)	0.0032	0.16
CD4+CD127+	ref	0.12 (0.11)	0.265	0.591
CD4+CD137+	ref	-0.12 (0.11)	0.244	0.591
CD4+CD27-	ref	0.22 (0.10)	0.0251	0.23
CD4+PD1+	ref	0.11 (0.11)	0.297	0.591
CD4+CD28-CD57+	ref	-0.08 (0.08)	0.296	0.591
CD4+CD28-CD27-	ref	0.04 (0.08)	0.649	0.78
CD4 ED (early differentiated)	ref	0.17 (0.11)	0.108	0.444
CD4 ID (intermediate differentiated)	ref	-0.20 (0.09)	0.0249	0.23
CD4+ TEMRA	ref	-0.09 (0.08)	0.285	0.591
CD4 Tn (naïve)	ref	-0.27 (0.10)	0.0082	0.16
CD4 Tint (intermediate memory)	ref	-0.18 (0.11)	0.0951	0.444
CD4 Teff (effector)	ref	-0.02 (0.09)	0.812	0.886
CD4 Tcm (central memory)	ref	0.22 (0.11)	0.035	0.266
CD4 Ttm (transitional memory)	ref	0.00 (0.11)	0.949	0.957
CD4 Tem (effector memory)	ref	0.06 (0.10)	0.574	0.75
Cytotoxic T cells	ref	0.06 (0.09)	0.538	0.735
CD8+CD45RA+	ref	-0.13 (0.10)	0.204	0.591
CD8+CD45RO+	ref	0.08 (0.10)	0.45	0.672
CD8+CD28-	ref	-0.14 (0.09)	0.0895	0.444
CD8+CD57+	ref	-0.17 (0.09)	0.0538	0.356
CD8+CD95+	ref	0.09 (0.11)	0.389	0.661
CD8+CD127+	ref	0.17 (0.10)	0.0849	0.444
CD8+CD137+	ref	-0.13 (0.11)	0.218	0.591
CD8+CD27-	ref	0.05 (0.09)	0.568	0.75
CD8+PD1+	ref	0.13 (0.11)	0.216	0.591
CD8+CD28-CD57+	ref	-0.19 (0.09)	0.0291	0.247
CD8+CD28-CD27-	ref	-0.09 (0.08)	0.254	0.591
CD8 ED (early differentiated)	ref	0.07 (0.10)	0.493	0.698
CD8 ID (intermediate differentiated)	ref	-0.25 (0.10)	0.0131	0.16
CD8+ TEMRA	ref	-0.14 (0.09)	0.134	0.498
CD8 Tn (naïve)	ref	-0.09 (0.09)	0.285	0.591
CD8 Tint (intermediate memory)	ref	-0.22 (0.11)	0.0357	0.266
CD8 Teff (effector)	ref	-0.07 (0.09)	0.395	0.661
CD8 Tcm (central memory)	ref	0.14 (0.10)	0.176	0.591
CD8 Ttm (transitional memory)	ref	-0.13 (0.10)	0.205	0.591
CD8 Tem (effector memory)	ref	-0.05 (0.11)	0.643	0.78
B cells	ref	-0.02 (0.11)	0.833	0.893
gd T cells (gamma delta T cells)	ref	-0.07 (0.11)	0.53	0.734
Natural Killer (NK) cells	ref	0.11 (0.10)	0.294	0.591
CD38+ T cells	ref	-0.03 (0.11)	0.775	0.854
HLA-DR+ T cells	ref	0.01 (0.11)	0.903	0.918
CD38+HLADR+ T cells	ref	-0.05 (0.11)	0.642	0.78
IgD B cells	ref	-0.18 (0.11)	0.0941	0.444
IgM B cells	ref	-0.18 (0.11)	0.0959	0.444
IgDIgM Bcells	ref	-0.18 (0.11)	0.101	0.444
CD43+ B cells	ref	0.04 (0.11)	0.733	0.827
CD27+ B cells	ref	0.15 (0.11)	0.163	0.584
B1 cells	ref	0.06 (0.11)	0.588	0.753
Memory B cells (Bmem)	ref	0.11 (0.11)	0.296	0.591
IgD B1cell	ref	0.05 (0.10)	0.645	0.78
IgM B1cell	ref	-0.04 (0.11)	0.685	0.807
IgD IgM B1cell	ref	0.10 (0.10)	0.373	0.661
IgD Bmem	ref	-0.10 (0.11)	0.357	0.645
IgM Bmem	ref	-0.10 (0.10)	0.357	0.645
IgD IgM Bmem	ref	-0.12 (0.10)	0.268	0.591
TH1	ref	0.11 (0.10)	0.271	0.591
TH2	ref	-0.04 (0.11)	0.731	0.827
TH17	ref	-0.15 (0.11)	0.18	0.591
CD4+TNFa+	ref	0.17 (0.11)	0.107	0.444
CD4+GRANZYME B+	ref	-0.01 (0.08)	0.892	0.915
CD4+PERFORIN+	ref	0.06 (0.11)	0.544	0.736
CD4+TNFa+IFNg+	ref	0.09 (0.10)	0.356	0.645
CD4+IL17+IFNg+	ref	-0.13 (0.10)	0.21	0.591
Tc1	ref	-0.08 (0.10)	0.442	0.672
Tc2	ref	0.09 (0.11)	0.405	0.661
Tc17	ref	-0.09 (0.11)	0.421	0.668
CD8+TNFa+	ref	0.09 (0.10)	0.396	0.661
CD8+Granzyme B+	ref	-0.21 (0.08)	0.0135	0.16
CD8+PERFORIN+	ref	-0.00 (0.10)	0.963	0.963
CD8+TNFa+IFNg+	ref	-0.05 (0.10)	0.629	0.78
CD8+IL17+IFNg+	ref	-0.10 (0.10)	0.316	0.617
CD8+IL17+IFNg+	ref	-0.25 (0.10)	0.0126	0.16
CD4+CD25+	ref	-0.02 (0.11)	0.825	0.893
CD4+CD25+CD127-	ref	-0.12 (0.11)	0.265	0.591
CD4+CD25+CD127-Tbet+	ref	0.02 (0.11)	0.877	0.908
CD4+CD25+CD127-Rorgt+	ref	-0.09 (0.11)	0.414	0.666
CD4+CD25+CD127-FoxP3+Rorgt+	ref	0.26 (0.10)	0.0132	0.16
CD4+FoxP3+	ref	0.31 (0.11)	0.00398	0.16
CD4 FoxP3 Tregs	ref	0.25 (0.11)	0.0158	0.171
CD4+Tbet+	ref	0.08 (0.11)	0.43	0.672
CD4+Rorgt+	ref	-0.11 (0.11)	0.328	0.629
CD4+Tbet+Rorgt+	ref	0.09 (0.11)	0.401	0.661
CD8+CD25+	ref	0.08 (0.11)	0.459	0.674
CD8+CD25+CD127-	ref	-0.12 (0.10)	0.24	0.591
CD8+CD25+CD127-Tbet+	ref	-0.08 (0.10)	0.435	0.672
CD8+CD25+CD127-Rorgt+	ref	-0.09 (0.10)	0.378	0.661
CD8+FoxP3+	ref	0.17 (0.10)	0.106	0.444
CD8 FoxP3 Tregs	ref	0.14 (0.10)	0.167	0.584
CD8+Tbet+	ref	0.04 (0.10)	0.701	0.81
CD8+Rorgt+	ref	0.08 (0.11)	0.452	0.672
CD8+Tbet+Rorgt+	ref	0.05 (0.10)	0.636	0.78
CD14 total	ref	0.18 (0.11)	0.108	0.444
CM (Classical Monocytes)	ref	-0.04 (0.11)	0.699	0.81
IM (Intermediate Monocytes)	ref	0.07 (0.11)	0.512	0.717
NCM (Non-classical monocytes)	ref	-0.02 (0.11)	0.84	0.893
TREM2+ CM	ref	-0.17 (0.11)	0.125	0.478
Slan+ CM	ref	-0.04 (0.11)	0.737	0.827
CD33+ CM	ref	0.13 (0.11)	0.235	0.591
CD163+ CM	ref	-0.17 (0.11)	0.115	0.457
TREM2+ IM	ref	-0.13 (0.10)	0.228	0.591
Slan+ IM	ref	0.06 (0.11)	0.571	0.75
CD33+ IM	ref	0.13 (0.11)	0.24	0.591
CD163+ IM	ref	-0.13 (0.11)	0.231	0.591
TREM2+ NCM	ref	-0.17 (0.10)	0.104	0.444
CD87+ NCM	ref	0.00 (0.09)	0.848	0.893
CCR2+ NCM	ref	-0.22 (0.11)	0.0423	0.296
Slan+ NCM	ref	-0.01 (0.11)	0.864	0.902
CD33+ NCM	ref	0.03 (0.10)	0.757	0.842
CD163+ NCM	ref	-0.04 (0.11)	0.667	0.794
CD4/CD8	ref	-0.10 (0.09)	0.298	0.591
CD4 Tn/Tm	ref	-0.28 (0.10)	0.0057	0.16
CD8 Tn/Tm	ref	-0.06 (0.08)	0.476	0.691
CMV levels were log-transformed; immune cell phenotypes were inverse normal transformed. Models were fitted for 10 imputed datasets; effect estimates, and p-values were pooled over the 10 fitted models. FDRs were calculated on the pooled p-values b.
