# Supplementary material for: Circulating immune cell phenotypes are associated with age, sex, CMV, and smoking status in the Framingham Heart Study offspring participants
Source: Aging (Albany NY). 2023 Apr 27;15(10):3939–66. doi: 10.18632/aging.204686 (PMC10258017; doi:10.18632/aging.204686)
Supplement: Supplementary Table 12 [file aging-15-204686-s013.xlsx]

## Sheet: Sheet1
Supplementary Table 12. Immune cell phenotype distributions across BMI groups adjusted for all Model 2 covariates a using multiple imputations.
Cell types	BMI <=24.9	BMI 25-29.9	BMI >=30	p	FDR		a. Model 2 covariates include age, sex, CMV status, education level, APOE genotypes, BMI groups, and indicators of smoking, presence of diabetes, prevalent CVD, prevalent AF, SBP, on hypertension treatment at exam 7, TC, HDL, on lipid treatment at exam 7, and cancer prior to exam 7. CMV was treated as linear with participants whose CMV above LOD was set as a fixed value above the LOD. b. The thre…
T cells	ref	-0.06 (0.08)	-0.01 (0.09)	0.618	0.953
T helper cells	ref	-0.10 (0.07)	0.15 (0.08)	0.00321	0.224
CD4+CD45RA+	ref	-0.04 (0.08)	0.04 (0.09)	0.604	0.953
CD4+CD45RO+	ref	0.02 (0.08)	-0.03 (0.09)	0.76	0.953
CD4+CD28-	ref	0.05 (0.07)	-0.05 (0.08)	0.332	0.894
CD4+CD57+	ref	-0.00 (0.06)	-0.06 (0.07)	0.548	0.953
CD4+CD95+	ref	0.03 (0.08)	-0.01 (0.09)	0.817	0.953
CD4+CD127+	ref	0.16 (0.08)	0.20 (0.09)	0.0723	0.648
CD4+CD137+	ref	0.13 (0.08)	0.11 (0.09)	0.267	0.894
CD4+CD27-	ref	0.01 (0.07)	-0.03 (0.08)	0.796	0.953
CD4+PD1+	ref	0.09 (0.08)	-0.00 (0.09)	0.333	0.894
CD4+CD28-CD57+	ref	0.01 (0.06)	-0.05 (0.07)	0.586	0.953
CD4+CD28-CD27-	ref	0.06 (0.06)	-0.01 (0.07)	0.378	0.894
CD4 ED (early differentiated)	ref	0.06 (0.08)	0.03 (0.09)	0.699	0.953
CD4 ID (intermediate differentiated)	ref	-0.04 (0.07)	-0.04 (0.08)	0.745	0.953
CD4+ TEMRA	ref	-0.01 (0.06)	-0.03 (0.07)	0.849	0.961
CD4 Tn (naïve)	ref	-0.02 (0.08)	0.03 (0.09)	0.74	0.953
CD4 Tint (intermediate memory)	ref	0.06 (0.08)	0.06 (0.09)	0.672	0.953
CD4 Teff (effector)	ref	0.05 (0.07)	0.06 (0.08)	0.66	0.953
CD4 Tcm (central memory)	ref	0.02 (0.08)	0.01 (0.09)	0.916	0.961
CD4 Ttm (transitional memory)	ref	0.09 (0.08)	-0.03 (0.09)	0.272	0.894
CD4 Tem (effector memory)	ref	0.07 (0.07)	-0.07 (0.09)	0.157	0.731
Cytotoxic T cells	ref	0.01 (0.07)	-0.14 (0.08)	0.0762	0.648
CD8+CD45RA+	ref	0.06 (0.08)	0.16 (0.09)	0.196	0.863
CD8+CD45RO+	ref	-0.06 (0.08)	-0.14 (0.09)	0.296	0.894
CD8+CD28-	ref	0.07 (0.06)	0.04 (0.07)	0.58	0.953
CD8+CD57+	ref	-0.00 (0.07)	0.02 (0.07)	0.92	0.961
CD8+CD95+	ref	0.00 (0.08)	-0.03 (0.09)	0.902	0.961
CD8+CD127+	ref	0.00 (0.07)	-0.07 (0.08)	0.579	0.953
CD8+CD137+	ref	0.06 (0.08)	-0.03 (0.09)	0.484	0.936
CD8+CD27-	ref	-0.01 (0.06)	0.01 (0.07)	0.929	0.961
CD8+PD1+	ref	0.10 (0.08)	0.02 (0.09)	0.376	0.894
CD8+CD28-CD57+	ref	-0.00 (0.06)	0.02 (0.07)	0.914	0.961
CD8+CD28-CD27-	ref	0.04 (0.06)	0.03 (0.07)	0.78	0.953
CD8 ED (early differentiated)	ref	-0.02 (0.08)	-0.12 (0.09)	0.31	0.894
CD8 ID (intermediate differentiated)	ref	0.04 (0.08)	0.03 (0.09)	0.831	0.96
CD8+ TEMRA	ref	-0.02 (0.07)	0.04 (0.08)	0.617	0.953
CD8 Tn (naïve)	ref	-0.01 (0.07)	0.02 (0.07)	0.893	0.961
CD8 Tint (intermediate memory)	ref	0.10 (0.08)	0.08 (0.09)	0.431	0.9
CD8 Teff (effector)	ref	0.09 (0.07)	0.16 (0.08)	0.113	0.692
CD8 Tcm (central memory)	ref	-0.06 (0.08)	-0.11 (0.09)	0.423	0.9
CD8 Ttm (transitional memory)	ref	0.03 (0.08)	-0.08 (0.09)	0.33	0.894
CD8 Tem (effector memory)	ref	-0.05 (0.08)	-0.13 (0.09)	0.374	0.894
B cells	ref	0.05 (0.08)	-0.07 (0.09)	0.294	0.894
gd T cells (gamma delta T cells)	ref	0.15 (0.08)	0.06 (0.09)	0.16	0.731
Natural Killer (NK) cells	ref	0.04 (0.08)	0.09 (0.09)	0.597	0.953
CD38+ T cells	ref	0.09 (0.08)	0.09 (0.09)	0.489	0.936
HLA-DR+ T cells	ref	-0.15 (0.08)	-0.16 (0.09)	0.128	0.692
CD38+HLADR+ T cells	ref	-0.00 (0.08)	-0.01 (0.09)	0.956	0.961
IgD B cells	ref	0.01 (0.08)	0.04 (0.09)	0.785	0.953
IgM B cells	ref	0.07 (0.08)	0.11 (0.09)	0.49	0.936
IgDIgM Bcells	ref	-0.00 (0.08)	0.03 (0.09)	0.809	0.953
CD43+ B cells	ref	0.02 (0.08)	-0.03 (0.09)	0.722	0.953
CD27+ B cells	ref	0.00 (0.08)	-0.00 (0.09)	0.935	0.961
B1 cells	ref	0.06 (0.08)	0.03 (0.09)	0.729	0.953
Memory B cells (Bmem)	ref	-0.05 (0.08)	0.00 (0.09)	0.662	0.953
IgD B1cell	ref	0.08 (0.08)	0.09 (0.09)	0.512	0.936
IgM B1cell	ref	0.11 (0.08)	0.09 (0.09)	0.395	0.894
IgD IgM B1cell	ref	0.10 (0.08)	0.08 (0.09)	0.406	0.894
IgD Bmem	ref	0.01 (0.08)	0.09 (0.09)	0.474	0.936
IgM Bmem	ref	0.06 (0.08)	0.15 (0.09)	0.247	0.894
IgD IgM Bmem	ref	0.01 (0.08)	0.06 (0.09)	0.668	0.953
TH1	ref	0.02 (0.07)	-0.04 (0.09)	0.715	0.953
TH2	ref	-0.04 (0.08)	-0.01 (0.09)	0.789	0.953
TH17	ref	-0.04 (0.08)	-0.07 (0.09)	0.741	0.953
CD4+TNFa+	ref	0.01 (0.08)	0.04 (0.09)	0.879	0.961
CD4+GRANZYME B+	ref	0.05 (0.06)	-0.03 (0.07)	0.37	0.894
CD4+PERFORIN+	ref	0.05 (0.08)	0.00 (0.09)	0.686	0.953
CD4+TNFa+IFNg+	ref	0.01 (0.08)	-0.02 (0.09)	0.887	0.961
CD4+IL17+IFNg+	ref	-0.12 (0.08)	-0.14 (0.09)	0.241	0.894
Tc1	ref	-0.03 (0.08)	-0.06 (0.09)	0.757	0.953
Tc2	ref	-0.16 (0.08)	-0.08 (0.09)	0.14	0.71
Tc17	ref	0.08 (0.08)	0.12 (0.09)	0.425	0.9
CD8+TNFa+	ref	0.05 (0.08)	0.05 (0.09)	0.76	0.953
CD8+Granzyme B+	ref	0.04 (0.06)	0.02 (0.07)	0.809	0.953
CD8+PERFORIN+	ref	-0.01 (0.08)	0.09 (0.09)	0.404	0.894
CD8+TNFa+IFNg+	ref	0.00 (0.08)	-0.03 (0.09)	0.875	0.961
CD8+IL17+IFNg+	ref	-0.06 (0.07)	0.00 (0.08)	0.611	0.953
CD8+IL17+IFNg+	ref	0.02 (0.08)	0.11 (0.09)	0.373	0.894
CD4+CD25+	ref	-0.11 (0.08)	-0.05 (0.09)	0.393	0.894
CD4+CD25+CD127-	ref	0.00 (0.08)	-0.00 (0.09)	0.961	0.961
CD4+CD25+CD127-Tbet+	ref	-0.08 (0.08)	-0.05 (0.09)	0.553	0.953
CD4+CD25+CD127-Rorgt+	ref	0.00 (0.08)	0.01 (0.09)	0.959	0.961
CD4+CD25+CD127-FoxP3+Rorgt+	ref	-0.02 (0.08)	0.13 (0.09)	0.126	0.692
CD4+FoxP3+	ref	-0.03 (0.08)	0.19 (0.09)	0.019	0.453
CD4 FoxP3 Tregs	ref	-0.05 (0.08)	0.08 (0.09)	0.238	0.894
CD4+Tbet+	ref	-0.16 (0.08)	-0.05 (0.09)	0.122	0.692
CD4+Rorgt+	ref	-0.14 (0.08)	-0.01 (0.09)	0.143	0.71
CD4+Tbet+Rorgt+	ref	-0.15 (0.08)	-0.04 (0.09)	0.128	0.692
CD8+CD25+	ref	-0.18 (0.08)	-0.07 (0.09)	0.0749	0.648
CD8+CD25+CD127-	ref	-0.07 (0.08)	0.04 (0.09)	0.299	0.894
CD8+CD25+CD127-Tbet+	ref	-0.06 (0.08)	0.05 (0.09)	0.309	0.894
CD8+CD25+CD127-Rorgt+	ref	-0.04 (0.08)	0.07 (0.09)	0.341	0.894
CD8+FoxP3+	ref	-0.14 (0.08)	0.11 (0.09)	0.00376	0.224
CD8 FoxP3 Tregs	ref	-0.12 (0.08)	0.05 (0.09)	0.0426	0.633
CD8+Tbet+	ref	-0.20 (0.08)	-0.09 (0.09)	0.0413	0.633
CD8+Rorgt+	ref	-0.17 (0.08)	-0.03 (0.09)	0.0542	0.648
CD8+Tbet+Rorgt+	ref	-0.18 (0.08)	-0.07 (0.09)	0.0727	0.648
CD14 total	ref	-0.20 (0.08)	-0.17 (0.09)	0.0563	0.648
CM (Classical Monocytes)	ref	-0.03 (0.08)	-0.10 (0.09)	0.504	0.936
IM (Intermediate Monocytes)	ref	0.06 (0.08)	0.10 (0.09)	0.519	0.936
NCM (Non-classical monocytes)	ref	-0.10 (0.08)	-0.02 (0.09)	0.397	0.894
TREM2+ CM	ref	0.05 (0.08)	0.06 (0.09)	0.724	0.953
Slan+ CM	ref	-0.06 (0.08)	-0.02 (0.09)	0.652	0.953
CD33+ CM	ref	0.03 (0.08)	-0.19 (0.09)	0.0179	0.453
CD163+ CM	ref	-0.09 (0.08)	-0.21 (0.09)	0.0817	0.648
TREM2+ IM	ref	0.07 (0.08)	0.10 (0.09)	0.507	0.936
Slan+ IM	ref	-0.13 (0.08)	-0.08 (0.09)	0.249	0.894
CD33+ IM	ref	0.01 (0.08)	-0.22 (0.09)	0.00992	0.394
CD163+ IM	ref	-0.11 (0.08)	-0.20 (0.09)	0.121	0.692
TREM2+ NCM	ref	0.01 (0.08)	0.00 (0.09)	0.898	0.961
CD87+ NCM	ref	-0.08 (0.07)	0.01 (0.08)	0.279	0.894
CCR2+ NCM	ref	-0.12 (0.08)	-0.14 (0.09)	0.229	0.894
Slan+ NCM	ref	-0.08 (0.08)	-0.02 (0.09)	0.479	0.936
CD33+ NCM	ref	0.04 (0.08)	-0.12 (0.09)	0.108	0.692
CD163+ NCM	ref	-0.00 (0.08)	0.03 (0.09)	0.801	0.953
CD4/CD8	ref	-0.04 (0.07)	0.15 (0.08)	0.0231	0.459
CD4 Tn/Tm	ref	-0.03 (0.08)	0.02 (0.09)	0.798	0.953
CD8 Tn/Tm	ref	-0.01 (0.06)	-0.01 (0.07)	0.944	0.961
CMV levels were log-transformed; immune cell phenotypes were inverse normal transformed. Models were fitted for 10 imputed datasets; effect estimates, and p-values were pooled over the 10 fitted models. FDRs were calculated on the pooled p-values b.
