# Supplementary material for: Circulating immune cell phenotypes are associated with age, sex, CMV, and smoking status in the Framingham Heart Study offspring participants
Source: Aging (Albany NY). 2023 Apr 27;15(10):3939–66. doi: 10.18632/aging.204686 (PMC10258017; doi:10.18632/aging.204686)
Supplement: Supplementary Table 13 [file aging-15-204686-s014.xlsx]

## Sheet: Sheet1
Supplementary Table 13. Immune cell phenotype distributions between prevalent CVD or not at exam 7 adjusted for all Model 2 covariates a using multiple imputations.
Cell types	No prevalent CVD (n=854)	Prevalent CVD (n=142)	p	FDR		a. Model 2 covariates include age, sex, CMV status, education level, APOE genotypes, BMI groups, and indicators of smoking, presence of diabetes, prevalent CVD, prevalent AF, SBP, on hypertension treatment at exam 7, TC, HDL, on lipid treatment at exam 7, and cancer prior to exam 7. CMV was treated as linear with participants whose CMV above LOD was set as a fixed value above the LOD. b. The thre…
T cells	ref	-0.00 (0.10)	0.957	0.957
T helper cells	ref	-0.15 (0.09)	0.111	0.579
CD4+CD45RA+	ref	-0.19 (0.10)	0.0559	0.444
CD4+CD45RO+	ref	0.13 (0.10)	0.203	0.646
CD4+CD28-	ref	0.10 (0.09)	0.251	0.646
CD4+CD57+	ref	0.16 (0.08)	0.0544	0.444
CD4+CD95+	ref	0.13 (0.10)	0.193	0.646
CD4+CD127+	ref	-0.07 (0.10)	0.514	0.806
CD4+CD137+	ref	0.15 (0.10)	0.14	0.641
CD4+CD27-	ref	0.21 (0.09)	0.022	0.405
CD4+PD1+	ref	0.18 (0.10)	0.0762	0.504
CD4+CD28-CD57+	ref	0.17 (0.08)	0.0218	0.405
CD4+CD28-CD27-	ref	0.11 (0.08)	0.163	0.641
CD4 ED (early differentiated)	ref	0.02 (0.10)	0.868	0.914
CD4 ID (intermediate differentiated)	ref	0.04 (0.09)	0.603	0.818
CD4+ TEMRA	ref	0.11 (0.08)	0.176	0.641
CD4 Tn (naïve)	ref	-0.26 (0.10)	0.00747	0.405
CD4 Tint (intermediate memory)	ref	0.05 (0.10)	0.578	0.818
CD4 Teff (effector)	ref	-0.04 (0.08)	0.633	0.818
CD4 Tcm (central memory)	ref	0.01 (0.10)	0.904	0.935
CD4 Ttm (transitional memory)	ref	0.10 (0.10)	0.336	0.713
CD4 Tem (effector memory)	ref	0.03 (0.09)	0.785	0.876
Cytotoxic T cells	ref	0.07 (0.09)	0.41	0.782
CD8+CD45RA+	ref	-0.04 (0.10)	0.683	0.839
CD8+CD45RO+	ref	0.02 (0.10)	0.802	0.876
CD8+CD28-	ref	0.04 (0.08)	0.625	0.818
CD8+CD57+	ref	0.05 (0.08)	0.497	0.806
CD8+CD95+	ref	0.05 (0.10)	0.603	0.818
CD8+CD127+	ref	-0.10 (0.09)	0.293	0.658
CD8+CD137+	ref	0.16 (0.10)	0.1	0.569
CD8+CD27-	ref	0.08 (0.08)	0.345	0.719
CD8+PD1+	ref	0.23 (0.10)	0.0238	0.405
CD8+CD28-CD57+	ref	0.01 (0.08)	0.895	0.934
CD8+CD28-CD27-	ref	0.03 (0.08)	0.724	0.852
CD8 ED (early differentiated)	ref	-0.07 (0.09)	0.47	0.782
CD8 ID (intermediate differentiated)	ref	-0.05 (0.09)	0.599	0.818
CD8+ TEMRA	ref	0.06 (0.08)	0.504	0.806
CD8 Tn (naïve)	ref	-0.14 (0.08)	0.0829	0.519
CD8 Tint (intermediate memory)	ref	-0.02 (0.10)	0.821	0.883
CD8 Teff (effector)	ref	0.05 (0.08)	0.579	0.818
CD8 Tcm (central memory)	ref	-0.11 (0.09)	0.238	0.646
CD8 Ttm (transitional memory)	ref	0.00 (0.10)	0.947	0.957
CD8 Tem (effector memory)	ref	0.04 (0.10)	0.686	0.839
B cells	ref	-0.10 (0.10)	0.304	0.658
gd T cells (gamma delta T cells)	ref	0.01 (0.10)	0.956	0.957
Natural Killer (NK) cells	ref	0.13 (0.10)	0.172	0.641
CD38+ T cells	ref	-0.07 (0.10)	0.473	0.782
HLA-DR+ T cells	ref	-0.08 (0.10)	0.45	0.782
CD38+HLADR+ T cells	ref	-0.08 (0.10)	0.396	0.782
IgD B cells	ref	-0.11 (0.10)	0.265	0.646
IgM B cells	ref	-0.06 (0.10)	0.531	0.806
IgDIgM Bcells	ref	-0.11 (0.10)	0.257	0.646
CD43+ B cells	ref	0.07 (0.10)	0.469	0.782
CD27+ B cells	ref	-0.08 (0.10)	0.428	0.782
B1 cells	ref	-0.03 (0.10)	0.784	0.876
Memory B cells (Bmem)	ref	-0.12 (0.10)	0.226	0.646
IgD B1cell	ref	-0.03 (0.10)	0.691	0.839
IgM B1cell	ref	0.03 (0.10)	0.795	0.876
IgD IgM B1cell	ref	-0.03 (0.09)	0.688	0.839
IgD Bmem	ref	-0.04 (0.10)	0.704	0.846
IgM Bmem	ref	-0.08 (0.10)	0.451	0.782
IgD IgM Bmem	ref	-0.07 (0.10)	0.464	0.782
TH1	ref	0.18 (0.09)	0.0479	0.444
TH2	ref	0.05 (0.10)	0.628	0.818
TH17	ref	-0.04 (0.10)	0.721	0.852
CD4+TNFa+	ref	0.08 (0.10)	0.453	0.782
CD4+GRANZYME B+	ref	0.09 (0.07)	0.241	0.646
CD4+PERFORIN+	ref	0.08 (0.10)	0.411	0.782
CD4+TNFa+IFNg+	ref	0.16 (0.09)	0.0955	0.568
CD4+IL17+IFNg+	ref	-0.19 (0.10)	0.0549	0.444
Tc1	ref	-0.00 (0.10)	0.949	0.957
Tc2	ref	-0.14 (0.10)	0.165	0.641
Tc17	ref	-0.20 (0.10)	0.0429	0.444
CD8+TNFa+	ref	-0.08 (0.10)	0.4	0.782
CD8+Granzyme B+	ref	0.02 (0.08)	0.794	0.876
CD8+PERFORIN+	ref	-0.10 (0.09)	0.274	0.646
CD8+TNFa+IFNg+	ref	-0.04 (0.09)	0.642	0.821
CD8+IL17+IFNg+	ref	0.05 (0.09)	0.568	0.818
CD8+IL17+IFNg+	ref	0.06 (0.09)	0.522	0.806
CD4+CD25+	ref	0.18 (0.10)	0.0725	0.504
CD4+CD25+CD127-	ref	0.15 (0.10)	0.146	0.641
CD4+CD25+CD127-Tbet+	ref	0.11 (0.10)	0.269	0.646
CD4+CD25+CD127-Rorgt+	ref	0.13 (0.10)	0.214	0.646
CD4+CD25+CD127-FoxP3+Rorgt+	ref	0.14 (0.10)	0.167	0.641
CD4+FoxP3+	ref	0.21 (0.10)	0.0377	0.444
CD4 FoxP3 Tregs	ref	0.18 (0.10)	0.0655	0.487
CD4+Tbet+	ref	0.11 (0.10)	0.261	0.646
CD4+Rorgt+	ref	0.12 (0.10)	0.242	0.646
CD4+Tbet+Rorgt+	ref	0.11 (0.10)	0.286	0.655
CD8+CD25+	ref	0.08 (0.10)	0.431	0.782
CD8+CD25+CD127-	ref	0.12 (0.10)	0.214	0.646
CD8+CD25+CD127-Tbet+	ref	0.10 (0.09)	0.277	0.646
CD8+CD25+CD127-Rorgt+	ref	0.12 (0.10)	0.244	0.646
CD8+FoxP3+	ref	0.22 (0.10)	0.0207	0.405
CD8 FoxP3 Tregs	ref	0.18 (0.10)	0.0546	0.444
CD8+Tbet+	ref	0.06 (0.10)	0.569	0.818
CD8+Rorgt+	ref	0.08 (0.10)	0.44	0.782
CD8+Tbet+Rorgt+	ref	0.05 (0.10)	0.608	0.818
CD14 total	ref	0.02 (0.10)	0.738	0.852
CM (Classical Monocytes)	ref	-0.24 (0.10)	0.0186	0.405
IM (Intermediate Monocytes)	ref	0.14 (0.10)	0.165	0.641
NCM (Non-classical monocytes)	ref	0.25 (0.10)	0.0179	0.405
TREM2+ CM	ref	0.15 (0.10)	0.143	0.641
Slan+ CM	ref	0.06 (0.10)	0.551	0.818
CD33+ CM	ref	-0.00 (0.10)	0.829	0.883
CD163+ CM	ref	-0.05 (0.10)	0.626	0.818
TREM2+ IM	ref	0.12 (0.10)	0.245	0.646
Slan+ IM	ref	0.07 (0.10)	0.515	0.806
CD33+ IM	ref	-0.03 (0.10)	0.73	0.852
CD163+ IM	ref	0.04 (0.10)	0.662	0.838
TREM2+ NCM	ref	0.12 (0.10)	0.225	0.646
CD87+ NCM	ref	0.03 (0.08)	0.754	0.862
CCR2+ NCM	ref	0.11 (0.10)	0.303	0.658
Slan+ NCM	ref	0.08 (0.10)	0.441	0.782
CD33+ NCM	ref	0.01 (0.10)	0.831	0.883
CD163+ NCM	ref	-0.06 (0.10)	0.535	0.806
CD4/CD8	ref	-0.12 (0.09)	0.178	0.641
CD4 Tn/Tm	ref	-0.21 (0.10)	0.0275	0.409
CD8 Tn/Tm	ref	-0.13 (0.08)	0.112	0.579
CMV levels were log-transformed; immune cell phenotypes were inverse normal transformed. Models were fitted for 10 imputed datasets; effect estimates, and p-values were pooled over the 10 fitted models. FDRs were calculated on the pooled p-values b.
