# Supplementary material for: Circulating immune cell phenotypes are associated with age, sex, CMV, and smoking status in the Framingham Heart Study offspring participants
Source: Aging (Albany NY). 2023 Apr 27;15(10):3939–66. doi: 10.18632/aging.204686 (PMC10258017; doi:10.18632/aging.204686)
Supplement: Supplementary Table 14 [file aging-15-204686-s015.xlsx]

## Sheet: Sheet1
Supplementary Table 14. Immune cell phenotype distributions between prevalent AF or not at exam 7 adjusted for all Model 2 covariates a using multiple imputations.
Cell types	No prevalent AF (n=954)	Prevalent AF (n=42)	p	FDR		a. Model 2 covariates include age, sex, CMV status, education level, APOE genotypes, BMI groups, and indicators of smoking, presence of diabetes, prevalent CVD, prevalent AF, SBP, on hypertension treatment at exam 7, TC, HDL, on lipid treatment at exam 7, and cancer prior to exam 7. CMV was treated as linear with participants whose CMV above LOD was set as a fixed value above the LOD. b. The thre…
T cells	ref	0.04 (0.16)	0.821	0.953
T helper cells	ref	0.19 (0.15)	0.194	0.953
CD4+CD45RA+	ref	0.32 (0.16)	0.04	0.953
CD4+CD45RO+	ref	-0.31 (0.16)	0.0523	0.953
CD4+CD28-	ref	0.02 (0.14)	0.869	0.953
CD4+CD57+	ref	-0.07 (0.13)	0.602	0.953
CD4+CD95+	ref	-0.13 (0.16)	0.43	0.953
CD4+CD127+	ref	-0.11 (0.16)	0.49	0.953
CD4+CD137+	ref	-0.26 (0.16)	0.107	0.953
CD4+CD27-	ref	-0.36 (0.15)	0.017	0.673
CD4+PD1+	ref	-0.20 (0.16)	0.217	0.953
CD4+CD28-CD57+	ref	-0.09 (0.12)	0.476	0.953
CD4+CD28-CD27-	ref	-0.12 (0.13)	0.356	0.953
CD4 ED (early differentiated)	ref	-0.23 (0.16)	0.158	0.953
CD4 ID (intermediate differentiated)	ref	0.02 (0.14)	0.852	0.953
CD4+ TEMRA	ref	0.01 (0.13)	0.864	0.953
CD4 Tn (naïve)	ref	0.39 (0.15)	0.0118	0.673
CD4 Tint (intermediate memory)	ref	-0.03 (0.16)	0.865	0.953
CD4 Teff (effector)	ref	-0.01 (0.14)	0.835	0.953
CD4 Tcm (central memory)	ref	-0.18 (0.16)	0.27	0.953
CD4 Ttm (transitional memory)	ref	-0.21 (0.16)	0.203	0.953
CD4 Tem (effector memory)	ref	-0.28 (0.15)	0.0573	0.953
Cytotoxic T cells	ref	-0.00 (0.14)	0.918	0.953
CD8+CD45RA+	ref	-0.07 (0.16)	0.645	0.953
CD8+CD45RO+	ref	0.02 (0.16)	0.898	0.953
CD8+CD28-	ref	-0.02 (0.13)	0.848	0.953
CD8+CD57+	ref	0.03 (0.13)	0.834	0.953
CD8+CD95+	ref	-0.03 (0.16)	0.836	0.953
CD8+CD127+	ref	-0.08 (0.15)	0.582	0.953
CD8+CD137+	ref	-0.07 (0.16)	0.671	0.953
CD8+CD27-	ref	0.08 (0.13)	0.542	0.953
CD8+PD1+	ref	-0.10 (0.16)	0.52	0.953
CD8+CD28-CD57+	ref	0.01 (0.13)	0.92	0.953
CD8+CD28-CD27-	ref	0.01 (0.12)	0.893	0.953
CD8 ED (early differentiated)	ref	-0.12 (0.15)	0.435	0.953
CD8 ID (intermediate differentiated)	ref	-0.14 (0.15)	0.347	0.953
CD8+ TEMRA	ref	-0.12 (0.13)	0.365	0.953
CD8 Tn (naïve)	ref	0.02 (0.13)	0.869	0.953
CD8 Tint (intermediate memory)	ref	-0.19 (0.16)	0.239	0.953
CD8 Teff (effector)	ref	-0.12 (0.13)	0.384	0.953
CD8 Tcm (central memory)	ref	-0.04 (0.15)	0.769	0.953
CD8 Ttm (transitional memory)	ref	-0.18 (0.15)	0.263	0.953
CD8 Tem (effector memory)	ref	0.09 (0.16)	0.592	0.953
B cells	ref	-0.15 (0.16)	0.34	0.953
gd T cells (gamma delta T cells)	ref	-0.00 (0.16)	0.977	0.984
Natural Killer (NK) cells	ref	0.11 (0.16)	0.502	0.953
CD38+ T cells	ref	-0.07 (0.16)	0.676	0.953
HLA-DR+ T cells	ref	0.26 (0.16)	0.0975	0.953
CD38+HLADR+ T cells	ref	0.12 (0.16)	0.447	0.953
IgD B cells	ref	0.26 (0.16)	0.0973	0.953
IgM B cells	ref	0.13 (0.16)	0.415	0.953
IgDIgM Bcells	ref	0.27 (0.16)	0.0961	0.953
CD43+ B cells	ref	-0.30 (0.16)	0.0678	0.953
CD27+ B cells	ref	0.08 (0.16)	0.599	0.953
B1 cells	ref	-0.20 (0.16)	0.224	0.953
Memory B cells (Bmem)	ref	0.22 (0.16)	0.165	0.953
IgD B1cell	ref	-0.23 (0.16)	0.14	0.953
IgM B1cell	ref	-0.07 (0.16)	0.681	0.953
IgD IgM B1cell	ref	-0.19 (0.15)	0.22	0.953
IgD Bmem	ref	-0.01 (0.16)	0.927	0.953
IgM Bmem	ref	-0.15 (0.16)	0.357	0.953
IgD IgM Bmem	ref	-0.01 (0.16)	0.913	0.953
TH1	ref	-0.16 (0.15)	0.28	0.953
TH2	ref	0.32 (0.16)	0.0476	0.953
TH17	ref	0.01 (0.16)	0.929	0.953
CD4+TNFa+	ref	-0.13 (0.16)	0.416	0.953
CD4+GRANZYME B+	ref	-0.04 (0.12)	0.758	0.953
CD4+PERFORIN+	ref	-0.11 (0.16)	0.488	0.953
CD4+TNFa+IFNg+	ref	-0.13 (0.15)	0.386	0.953
CD4+IL17+IFNg+	ref	0.18 (0.16)	0.256	0.953
Tc1	ref	-0.06 (0.15)	0.673	0.953
Tc2	ref	0.12 (0.16)	0.478	0.953
Tc17	ref	0.19 (0.16)	0.244	0.953
CD8+TNFa+	ref	-0.13 (0.16)	0.421	0.953
CD8+Granzyme B+	ref	-0.02 (0.13)	0.887	0.953
CD8+PERFORIN+	ref	-0.03 (0.15)	0.843	0.953
CD8+TNFa+IFNg+	ref	-0.01 (0.15)	0.953	0.969
CD8+IL17+IFNg+	ref	-0.12 (0.15)	0.428	0.953
CD8+IL17+IFNg+	ref	-0.12 (0.15)	0.433	0.953
CD4+CD25+	ref	0.10 (0.16)	0.528	0.953
CD4+CD25+CD127-	ref	0.05 (0.16)	0.767	0.953
CD4+CD25+CD127-Tbet+	ref	-0.00 (0.16)	0.984	0.984
CD4+CD25+CD127-Rorgt+	ref	0.05 (0.16)	0.736	0.953
CD4+CD25+CD127-FoxP3+Rorgt+	ref	-0.25 (0.16)	0.118	0.953
CD4+FoxP3+	ref	-0.23 (0.16)	0.151	0.953
CD4 FoxP3 Tregs	ref	-0.21 (0.16)	0.177	0.953
CD4+Tbet+	ref	0.10 (0.16)	0.514	0.953
CD4+Rorgt+	ref	0.19 (0.16)	0.251	0.953
CD4+Tbet+Rorgt+	ref	0.11 (0.16)	0.477	0.953
CD8+CD25+	ref	-0.08 (0.16)	0.615	0.953
CD8+CD25+CD127-	ref	0.05 (0.16)	0.749	0.953
CD8+CD25+CD127-Tbet+	ref	-0.01 (0.15)	0.927	0.953
CD8+CD25+CD127-Rorgt+	ref	0.06 (0.16)	0.703	0.953
CD8+FoxP3+	ref	0.03 (0.15)	0.821	0.953
CD8 FoxP3 Tregs	ref	-0.10 (0.15)	0.527	0.953
CD8+Tbet+	ref	-0.09 (0.16)	0.565	0.953
CD8+Rorgt+	ref	-0.04 (0.16)	0.804	0.953
CD8+Tbet+Rorgt+	ref	-0.09 (0.16)	0.584	0.953
CD14 total	ref	0.21 (0.16)	0.214	0.953
CM (Classical Monocytes)	ref	0.26 (0.16)	0.119	0.953
IM (Intermediate Monocytes)	ref	-0.23 (0.16)	0.17	0.953
NCM (Non-classical monocytes)	ref	-0.18 (0.16)	0.287	0.953
TREM2+ CM	ref	0.02 (0.16)	0.799	0.953
Slan+ CM	ref	-0.05 (0.16)	0.701	0.953
CD33+ CM	ref	-0.07 (0.16)	0.65	0.953
CD163+ CM	ref	0.05 (0.16)	0.725	0.953
TREM2+ IM	ref	0.05 (0.16)	0.732	0.953
Slan+ IM	ref	-0.03 (0.16)	0.78	0.953
CD33+ IM	ref	-0.07 (0.16)	0.646	0.953
CD163+ IM	ref	0.00 (0.16)	0.765	0.953
TREM2+ NCM	ref	0.13 (0.16)	0.413	0.953
CD87+ NCM	ref	0.01 (0.13)	0.813	0.953
CCR2+ NCM	ref	-0.16 (0.16)	0.35	0.953
Slan+ NCM	ref	-0.09 (0.16)	0.536	0.953
CD33+ NCM	ref	-0.02 (0.16)	0.816	0.953
CD163+ NCM	ref	-0.09 (0.16)	0.594	0.953
CD4/CD8	ref	0.09 (0.14)	0.517	0.953
CD4 Tn/Tm	ref	0.38 (0.15)	0.0154	0.673
CD8 Tn/Tm	ref	0.04 (0.13)	0.744	0.953
CMV levels were log-transformed; immune cell phenotypes were inverse normal transformed. Models were fitted for 10 imputed datasets; effect estimates, and p-values were pooled over the 10 fitted models. FDRs were calculated on the pooled p-values b.
