# Supplementary material for: Circulating immune cell phenotypes are associated with age, sex, CMV, and smoking status in the Framingham Heart Study offspring participants
Source: Aging (Albany NY). 2023 Apr 27;15(10):3939–66. doi: 10.18632/aging.204686 (PMC10258017; doi:10.18632/aging.204686)
Supplement: Supplementary Table 15 [file aging-15-204686-s016.xlsx]

## Sheet: Sheet1
Supplementary Table 15. Immune cell phenotype distributions between chronic blood cancer prior to exam 7 or not adjusted for all Model 2 covariates a using multiple imputations.
Cell types	No blood cancer proir ex7 (n=990)	Blood cancer prior ex7 (n=6)	p	FDR		a. Model 2 covariates include age, sex, CMV status, education level, APOE genotypes, BMI groups, and indicators of smoking, presence of diabetes, prevalent CVD, prevalent AF, SBP, on hypertension treatment at exam 7, TC, HDL, on lipid treatment at exam 7, and cancer prior to exam 7. CMV was treated as linear with participants whose CMV above LOD was set as a fixed value above the LOD. b. The thre…
T cells	ref	-1.24 (0.39)	0.00157	0.155
T helper cells	ref	-0.58 (0.37)	0.119	0.504
CD4+CD45RA+	ref	-0.22 (0.40)	0.579	0.787
CD4+CD45RO+	ref	0.38 (0.40)	0.341	0.758
CD4+CD28-	ref	0.07 (0.35)	0.837	0.905
CD4+CD57+	ref	0.17 (0.32)	0.594	0.787
CD4+CD95+	ref	0.36 (0.40)	0.372	0.758
CD4+CD127+	ref	-0.14 (0.40)	0.736	0.868
CD4+CD137+	ref	0.32 (0.41)	0.426	0.768
CD4+CD27-	ref	0.31 (0.37)	0.395	0.758
CD4+PD1+	ref	0.45 (0.41)	0.271	0.701
CD4+CD28-CD57+	ref	0.28 (0.30)	0.349	0.758
CD4+CD28-CD27-	ref	0.10 (0.32)	0.744	0.868
CD4 ED (early differentiated)	ref	0.34 (0.41)	0.402	0.758
CD4 ID (intermediate differentiated)	ref	0.04 (0.35)	0.899	0.956
CD4+ TEMRA	ref	0.05 (0.32)	0.889	0.953
CD4 Tn (naïve)	ref	-0.27 (0.39)	0.487	0.783
CD4 Tint (intermediate memory)	ref	0.13 (0.40)	0.754	0.871
CD4 Teff (effector)	ref	0.52 (0.34)	0.128	0.509
CD4 Tcm (central memory)	ref	0.22 (0.40)	0.592	0.787
CD4 Ttm (transitional memory)	ref	0.74 (0.41)	0.0713	0.446
CD4 Tem (effector memory)	ref	0.25 (0.38)	0.502	0.783
Cytotoxic T cells	ref	0.34 (0.36)	0.339	0.758
CD8+CD45RA+	ref	0.01 (0.40)	0.979	0.988
CD8+CD45RO+	ref	0.09 (0.39)	0.82	0.902
CD8+CD28-	ref	0.97 (0.32)	0.00283	0.155
CD8+CD57+	ref	0.75 (0.33)	0.0224	0.284
CD8+CD95+	ref	0.27 (0.40)	0.514	0.783
CD8+CD127+	ref	-0.53 (0.37)	0.151	0.56
CD8+CD137+	ref	0.34 (0.40)	0.398	0.758
CD8+CD27-	ref	0.38 (0.32)	0.242	0.669
CD8+PD1+	ref	0.11 (0.41)	0.793	0.896
CD8+CD28-CD57+	ref	0.85 (0.32)	0.00871	0.164
CD8+CD28-CD27-	ref	0.84 (0.31)	0.00651	0.155
CD8 ED (early differentiated)	ref	-0.25 (0.38)	0.502	0.783
CD8 ID (intermediate differentiated)	ref	0.75 (0.38)	0.0484	0.393
CD8+ TEMRA	ref	0.61 (0.34)	0.0757	0.45
CD8 Tn (naïve)	ref	-0.60 (0.33)	0.0676	0.446
CD8 Tint (intermediate memory)	ref	0.56 (0.40)	0.162	0.566
CD8 Teff (effector)	ref	0.53 (0.33)	0.111	0.504
CD8 Tcm (central memory)	ref	-0.38 (0.38)	0.321	0.758
CD8 Ttm (transitional memory)	ref	0.27 (0.39)	0.488	0.783
CD8 Tem (effector memory)	ref	0.46 (0.40)	0.253	0.683
B cells	ref	1.04 (0.40)	0.00962	0.164
gd T cells (gamma delta T cells)	ref	0.32 (0.40)	0.421	0.768
Natural Killer (NK) cells	ref	-0.86 (0.40)	0.0298	0.322
CD38+ T cells	ref	0.10 (0.41)	0.814	0.902
HLA-DR+ T cells	ref	-0.15 (0.40)	0.709	0.868
CD38+HLADR+ T cells	ref	-0.31 (0.40)	0.441	0.783
IgD B cells	ref	-0.55 (0.40)	0.183	0.591
IgM B cells	ref	-0.25 (0.40)	0.553	0.783
IgDIgM Bcells	ref	-0.53 (0.40)	0.207	0.647
CD43+ B cells	ref	0.96 (0.41)	0.0239	0.284
CD27+ B cells	ref	-0.23 (0.41)	0.605	0.787
B1 cells	ref	0.57 (0.41)	0.183	0.591
Memory B cells (Bmem)	ref	-1.25 (0.40)	0.00598	0.155
IgD B1cell	ref	-0.31 (0.39)	0.465	0.783
IgM B1cell	ref	0.46 (0.40)	0.309	0.758
IgD IgM B1cell	ref	-0.18 (0.38)	0.655	0.82
IgD Bmem	ref	0.02 (0.40)	0.56	0.785
IgM Bmem	ref	-0.42 (0.40)	0.408	0.758
IgD IgM Bmem	ref	0.01 (0.40)	0.601	0.787
TH1	ref	0.62 (0.37)	0.0989	0.504
TH2	ref	0.03 (0.40)	0.941	0.973
TH17	ref	-0.94 (0.41)	0.0219	0.284
CD4+TNFa+	ref	0.67 (0.41)	0.0975	0.504
CD4+GRANZYME B+	ref	0.42 (0.30)	0.159	0.566
CD4+PERFORIN+	ref	0.61 (0.40)	0.128	0.509
CD4+TNFa+IFNg+	ref	0.60 (0.38)	0.116	0.504
CD4+IL17+IFNg+	ref	-0.75 (0.40)	0.0597	0.418
Tc1	ref	0.76 (0.39)	0.0496	0.393
Tc2	ref	-0.09 (0.41)	0.826	0.902
Tc17	ref	-1.15 (0.40)	0.00435	0.155
CD8+TNFa+	ref	0.35 (0.40)	0.382	0.758
CD8+Granzyme B+	ref	0.67 (0.32)	0.0368	0.365
CD8+PERFORIN+	ref	-0.00 (0.38)	0.988	0.988
CD8+TNFa+IFNg+	ref	0.62 (0.38)	0.104	0.504
CD8+IL17+IFNg+	ref	-0.22 (0.37)	0.546	0.783
CD8+IL17+IFNg+	ref	-0.50 (0.38)	0.184	0.591
CD4+CD25+	ref	-0.35 (0.41)	0.396	0.758
CD4+CD25+CD127-	ref	-0.38 (0.41)	0.358	0.758
CD4+CD25+CD127-Tbet+	ref	-0.26 (0.40)	0.512	0.783
CD4+CD25+CD127-Rorgt+	ref	-0.40 (0.41)	0.331	0.758
CD4+CD25+CD127-FoxP3+Rorgt+	ref	0.30 (0.40)	0.453	0.783
CD4+FoxP3+	ref	0.64 (0.40)	0.112	0.504
CD4 FoxP3 Tregs	ref	0.13 (0.40)	0.741	0.868
CD4+Tbet+	ref	-0.03 (0.40)	0.939	0.973
CD4+Rorgt+	ref	-0.12 (0.41)	0.777	0.889
CD4+Tbet+Rorgt+	ref	-0.01 (0.40)	0.986	0.988
CD8+CD25+	ref	-0.50 (0.41)	0.219	0.651
CD8+CD25+CD127-	ref	-0.35 (0.40)	0.379	0.758
CD8+CD25+CD127-Tbet+	ref	-0.24 (0.38)	0.539	0.783
CD8+CD25+CD127-Rorgt+	ref	-0.47 (0.40)	0.238	0.669
CD8+FoxP3+	ref	-0.01 (0.39)	0.98	0.988
CD8 FoxP3 Tregs	ref	-0.04 (0.39)	0.921	0.97
CD8+Tbet+	ref	-0.16 (0.40)	0.691	0.857
CD8+Rorgt+	ref	-0.43 (0.41)	0.295	0.746
CD8+Tbet+Rorgt+	ref	-0.14 (0.40)	0.722	0.868
CD14 total	ref	-0.20 (0.40)	0.543	0.783
CM (Classical Monocytes)	ref	-0.52 (0.40)	0.268	0.701
IM (Intermediate Monocytes)	ref	0.68 (0.41)	0.133	0.51
NCM (Non-classical monocytes)	ref	-0.27 (0.41)	0.525	0.783
TREM2+ CM	ref	-0.13 (0.41)	0.549	0.783
Slan+ CM	ref	0.15 (0.41)	0.62	0.789
CD33+ CM	ref	-0.13 (0.40)	0.598	0.787
CD163+ CM	ref	0.96 (0.40)	0.0583	0.418
TREM2+ IM	ref	-0.29 (0.40)	0.469	0.783
Slan+ IM	ref	0.19 (0.41)	0.609	0.787
CD33+ IM	ref	-0.15 (0.40)	0.623	0.789
CD163+ IM	ref	0.76 (0.40)	0.114	0.504
TREM2+ NCM	ref	-0.23 (0.39)	0.454	0.783
CD87+ NCM	ref	0.02 (0.34)	0.798	0.896
CCR2+ NCM	ref	-0.58 (0.40)	0.231	0.669
Slan+ NCM	ref	0.31 (0.40)	0.505	0.783
CD33+ NCM	ref	0.08 (0.40)	0.719	0.868
CD163+ NCM	ref	0.43 (0.40)	0.356	0.758
CD4/CD8	ref	-0.44 (0.36)	0.215	0.651
CD4 Tn/Tm	ref	-0.34 (0.39)	0.385	0.758
CD8 Tn/Tm	ref	-0.65 (0.32)	0.0438	0.393
CMV levels were log-transformed; immune cell phenotypes were inverse normal transformed. Models were fitted for 10 imputed datasets; effect estimates, and p-values were pooled over the 10 fitted models. FDRs were calculated on the pooled p-values b.
