# Supplementary material for: Circulating immune cell phenotypes are associated with age, sex, CMV, and smoking status in the Framingham Heart Study offspring participants
Source: Aging (Albany NY). 2023 Apr 27;15(10):3939–66. doi: 10.18632/aging.204686 (PMC10258017; doi:10.18632/aging.204686)
Supplement: Supplementary Table 16 [file aging-15-204686-s017.xlsx]

## Sheet: Sheet1
Supplementary Table 16. Immune cell phenotype distributions between participants on treatment of hypertension or not at exam 7 adjusted for all Model 2 covariates a using multiple imputations.
Cell types	Not on hypertension treatment (n=)	On hypertension treatment (n=)	p	FDR
T cells	ref	-0.1121 (0.07)	0.123	0.938
T helper cells	ref	0.0217 (0.07)	0.752	0.938
CD4+CD45RA+	ref	-0.0725 (0.07)	0.325	0.938			a. Model 2 covariates include age, sex, CMV status, education level, APOE genotypes, BMI groups, and indicators of smoking, presence of diabetes, prevalent CVD, prevalent AF, SBP, on hypertension treatment at exam 7, TC, HDL, on lipid treatment at exam 7, and cancer prior to exam 7. CMV was treated as linear with participants whose CMV above LOD was set as a fixed value above the LOD. b. The thre…
CD4+CD45RO+	ref	0.0902 (0.07)	0.226	0.938
CD4+CD28-	ref	-0.1470 (0.06)	0.0242	0.649
CD4+CD57+	ref	0.0034 (0.06)	0.911	0.939
CD4+CD95+	ref	0.0680 (0.07)	0.365	0.938
CD4+CD127+	ref	0.0364 (0.07)	0.627	0.938
CD4+CD137+	ref	0.0412 (0.08)	0.587	0.938
CD4+CD27-	ref	-0.0782 (0.07)	0.256	0.938
CD4+PD1+	ref	0.0187 (0.08)	0.805	0.938
CD4+CD28-CD57+	ref	-0.0659 (0.06)	0.244	0.938
CD4+CD28-CD27-	ref	-0.1013 (0.06)	0.0854	0.924
CD4 ED (early differentiated)	ref	0.1308 (0.08)	0.0837	0.924
CD4 ID (intermediate differentiated)	ref	-0.0176 (0.06)	0.783	0.938
CD4+ TEMRA	ref	-0.0396 (0.06)	0.508	0.938
CD4 Tn (naïve)	ref	-0.0108 (0.07)	0.862	0.939
CD4 Tint (intermediate memory)	ref	-0.0726 (0.07)	0.331	0.938
CD4 Teff (effector)	ref	-0.0852 (0.06)	0.182	0.938
CD4 Tcm (central memory)	ref	0.1657 (0.07)	0.0282	0.649
CD4 Ttm (transitional memory)	ref	0.0302 (0.08)	0.692	0.938
CD4 Tem (effector memory)	ref	0.0234 (0.07)	0.737	0.938
Cytotoxic T cells	ref	-0.0219 (0.07)	0.74	0.938
CD8+CD45RA+	ref	-0.0009 (0.07)	0.952	0.952
CD8+CD45RO+	ref	0.0299 (0.07)	0.683	0.938
CD8+CD28-	ref	0.0128 (0.06)	0.83	0.938
CD8+CD57+	ref	0.0924 (0.06)	0.127	0.938
CD8+CD95+	ref	0.0399 (0.07)	0.595	0.938
CD8+CD127+	ref	-0.0378 (0.07)	0.582	0.938
CD8+CD137+	ref	-0.0090 (0.07)	0.904	0.939
CD8+CD27-	ref	-0.0714 (0.06)	0.234	0.938
CD8+PD1+	ref	-0.0055 (0.08)	0.915	0.939
CD8+CD28-CD57+	ref	0.0637 (0.06)	0.288	0.938
CD8+CD28-CD27-	ref	-0.0295 (0.06)	0.602	0.938
CD8 ED (early differentiated)	ref	0.0740 (0.07)	0.293	0.938
CD8 ID (intermediate differentiated)	ref	0.1218 (0.07)	0.0851	0.924
CD8+ TEMRA	ref	0.0493 (0.06)	0.434	0.938
CD8 Tn (naïve)	ref	0.0358 (0.06)	0.555	0.938
CD8 Tint (intermediate memory)	ref	0.0987 (0.07)	0.182	0.938
CD8 Teff (effector)	ref	-0.0127 (0.06)	0.836	0.938
CD8 Tcm (central memory)	ref	0.0751 (0.07)	0.291	0.938
CD8 Ttm (transitional memory)	ref	0.0788 (0.07)	0.276	0.938
CD8 Tem (effector memory)	ref	-0.0205 (0.07)	0.784	0.938
B cells	ref	-0.0508 (0.07)	0.496	0.938
gd T cells (gamma delta T cells)	ref	0.0244 (0.07)	0.742	0.938
Natural Killer (NK) cells	ref	0.0855 (0.07)	0.245	0.938
CD38+ T cells	ref	-0.0558 (0.08)	0.461	0.938
HLA-DR+ T cells	ref	0.1054 (0.07)	0.156	0.938
CD38+HLADR+ T cells	ref	0.0118 (0.07)	0.874	0.939
IgD B cells	ref	-0.1580 (0.07)	0.0331	0.649
IgM B cells	ref	-0.2394 (0.07)	0.00141	0.168
IgDIgM Bcells	ref	-0.1691 (0.07)	0.0228	0.649
CD43+ B cells	ref	0.0589 (0.08)	0.439	0.938
CD27+ B cells	ref	0.1420 (0.07)	0.0615	0.915
B1 cells	ref	0.0448 (0.08)	0.563	0.938
Memory B cells (Bmem)	ref	0.1147 (0.07)	0.126	0.938
IgD B1cell	ref	0.0148 (0.07)	0.786	0.938
IgM B1cell	ref	-0.1048 (0.07)	0.162	0.938
IgD IgM B1cell	ref	-0.0088 (0.07)	0.808	0.938
IgD Bmem	ref	-0.0569 (0.07)	0.45	0.938
IgM Bmem	ref	-0.1037 (0.07)	0.17	0.938
IgD IgM Bmem	ref	-0.0393 (0.07)	0.601	0.938
TH1	ref	-0.1631 (0.07)	0.0189	0.649
TH2	ref	-0.1248 (0.07)	0.095	0.938
TH17	ref	0.0384 (0.08)	0.613	0.938
CD4+TNFa+	ref	-0.0149 (0.08)	0.831	0.938
CD4+GRANZYME B+	ref	-0.0779 (0.05)	0.158	0.938
CD4+PERFORIN+	ref	-0.0210 (0.07)	0.777	0.938
CD4+TNFa+IFNg+	ref	-0.1472 (0.07)	0.0382	0.649
CD4+IL17+IFNg+	ref	0.0599 (0.07)	0.42	0.938
Tc1	ref	-0.0506 (0.07)	0.482	0.938
Tc2	ref	-0.0356 (0.08)	0.639	0.938
Tc17	ref	-0.0542 (0.07)	0.468	0.938
CD8+TNFa+	ref	-0.0578 (0.07)	0.434	0.938
CD8+Granzyme B+	ref	0.0220 (0.06)	0.711	0.938
CD8+PERFORIN+	ref	0.0051 (0.07)	0.898	0.939
CD8+TNFa+IFNg+	ref	-0.0736 (0.07)	0.304	0.938
CD8+IL17+IFNg+	ref	-0.0093 (0.07)	0.893	0.939
CD8+IL17+IFNg+	ref	-0.0160 (0.07)	0.821	0.938
CD4+CD25+	ref	0.0894 (0.08)	0.238	0.938
CD4+CD25+CD127-	ref	-0.0052 (0.08)	0.932	0.948
CD4+CD25+CD127-Tbet+	ref	-0.0357 (0.07)	0.63	0.938
CD4+CD25+CD127-Rorgt+	ref	-0.0252 (0.08)	0.741	0.938
CD4+CD25+CD127-FoxP3+Rorgt+	ref	-0.0210 (0.07)	0.775	0.938
CD4+FoxP3+	ref	-0.0526 (0.07)	0.481	0.938
CD4 FoxP3 Tregs	ref	-0.0111 (0.07)	0.88	0.939
CD4+Tbet+	ref	0.0096 (0.07)	0.898	0.939
CD4+Rorgt+	ref	0.0519 (0.08)	0.493	0.938
CD4+Tbet+Rorgt+	ref	0.0018 (0.07)	0.947	0.952
CD8+CD25+	ref	0.0760 (0.08)	0.314	0.938
CD8+CD25+CD127-	ref	0.0733 (0.07)	0.32	0.938
CD8+CD25+CD127-Tbet+	ref	0.0616 (0.07)	0.386	0.938
CD8+CD25+CD127-Rorgt+	ref	0.0612 (0.07)	0.408	0.938
CD8+FoxP3+	ref	-0.0692 (0.07)	0.335	0.938
CD8 FoxP3 Tregs	ref	0.0593 (0.07)	0.41	0.938
CD8+Tbet+	ref	0.0434 (0.07)	0.555	0.938
CD8+Rorgt+	ref	0.0457 (0.08)	0.545	0.938
CD8+Tbet+Rorgt+	ref	0.0381 (0.07)	0.605	0.938
CD14 total	ref	-0.0205 (0.07)	0.72	0.938
CM (Classical Monocytes)	ref	0.1012 (0.07)	0.187	0.938
IM (Intermediate Monocytes)	ref	-0.0962 (0.08)	0.211	0.938
NCM (Non-classical monocytes)	ref	-0.0243 (0.08)	0.707	0.938
TREM2+ CM	ref	-0.0316 (0.07)	0.661	0.938
Slan+ CM	ref	0.0835 (0.08)	0.281	0.938
CD33+ CM	ref	0.0224 (0.07)	0.743	0.938
CD163+ CM	ref	0.1165 (0.07)	0.136	0.938
TREM2+ IM	ref	-0.0242 (0.07)	0.716	0.938
Slan+ IM	ref	0.0168 (0.07)	0.82	0.938
CD33+ IM	ref	-0.0101 (0.07)	0.809	0.938
CD163+ IM	ref	0.0521 (0.07)	0.5	0.938
TREM2+ NCM	ref	0.0173 (0.07)	0.762	0.938
CD87+ NCM	ref	0.0562 (0.06)	0.403	0.938
CCR2+ NCM	ref	0.0281 (0.07)	0.699	0.938
Slan+ NCM	ref	-0.0071 (0.07)	0.845	0.939
CD33+ NCM	ref	-0.0441 (0.07)	0.543	0.938
CD163+ NCM	ref	-0.0094 (0.07)	0.817	0.938
CD4/CD8	ref	0.0244 (0.07)	0.714	0.938
CD4 Tn/Tm	ref	-0.0249 (0.07)	0.729	0.938
CD8 Tn/Tm	ref	0.0166 (0.06)	0.779	0.938
CMV levels were log-transformed; immune cell phenotypes were inverse normal transformed. Models were fitted for 10 imputed datasets; effect estimates, and p-values were pooled over the 10 fitted models. FDRs were calculated on the pooled p-values b.
