# Supplementary material for: Circulating immune cell phenotypes are associated with age, sex, CMV, and smoking status in the Framingham Heart Study offspring participants
Source: Aging (Albany NY). 2023 Apr 27;15(10):3939–66. doi: 10.18632/aging.204686 (PMC10258017; doi:10.18632/aging.204686)
Supplement: Supplementary Table 17 [file aging-15-204686-s018.xlsx]

## Sheet: Sheet1
Supplementary Table 17. Immune cell phenotype distributions between participants on lipid treatment or not at exam 7 adjusted for all Model 2 covariates a using multiple imputations.
Cell types	Not onlipid treatment (n=)	On lipid treatment (n=)	p	FDR
T cells	ref	0.2122 (0.08)	0.0101	0.949
T helper cells	ref	-0.0002 (0.08)	0.942	0.949
CD4+CD45RA+	ref	-0.0140 (0.08)	0.864	0.949			a. Model 2 covariates include age, sex, CMV status, education level, APOE genotypes, BMI groups, and indicators of smoking, presence of diabetes, prevalent CVD, prevalent AF, SBP, on hypertension treatment at exam 7, TC, HDL, on lipid treatment at exam 7, and cancer prior to exam 7. CMV was treated as linear with participants whose CMV above LOD was set as a fixed value above the LOD. b. The thre…
CD4+CD45RO+	ref	-0.0132 (0.08)	0.875	0.949
CD4+CD28-	ref	0.0202 (0.07)	0.784	0.949
CD4+CD57+	ref	-0.0009 (0.07)	0.949	0.949
CD4+CD95+	ref	-0.0133 (0.08)	0.873	0.949
CD4+CD127+	ref	-0.1323 (0.08)	0.119	0.949
CD4+CD137+	ref	-0.1450 (0.08)	0.0882	0.949
CD4+CD27-	ref	-0.0084 (0.08)	0.912	0.949
CD4+PD1+	ref	-0.0550 (0.09)	0.52	0.949
CD4+CD28-CD57+	ref	0.0169 (0.06)	0.79	0.949
CD4+CD28-CD27-	ref	-0.0271 (0.07)	0.683	0.949
CD4 ED (early differentiated)	ref	-0.0127 (0.08)	0.878	0.949
CD4 ID (intermediate differentiated)	ref	0.1218 (0.07)	0.0956	0.949
CD4+ TEMRA	ref	0.0086 (0.07)	0.885	0.949
CD4 Tn (naïve)	ref	0.0044 (0.08)	0.937	0.949
CD4 Tint (intermediate memory)	ref	-0.0659 (0.08)	0.435	0.949
CD4 Teff (effector)	ref	-0.0259 (0.07)	0.72	0.949
CD4 Tcm (central memory)	ref	0.0185 (0.08)	0.827	0.949
CD4 Ttm (transitional memory)	ref	-0.0935 (0.09)	0.275	0.949
CD4 Tem (effector memory)	ref	-0.0758 (0.08)	0.337	0.949
Cytotoxic T cells	ref	0.0348 (0.07)	0.643	0.949
CD8+CD45RA+	ref	-0.0726 (0.08)	0.387	0.949
CD8+CD45RO+	ref	0.0609 (0.08)	0.462	0.949
CD8+CD28-	ref	0.0327 (0.07)	0.629	0.949
CD8+CD57+	ref	0.0623 (0.07)	0.364	0.949
CD8+CD95+	ref	0.0229 (0.08)	0.788	0.949
CD8+CD127+	ref	-0.0679 (0.08)	0.384	0.949
CD8+CD137+	ref	-0.0600 (0.08)	0.477	0.949
CD8+CD27-	ref	0.0144 (0.07)	0.832	0.949
CD8+PD1+	ref	-0.0849 (0.08)	0.319	0.949
CD8+CD28-CD57+	ref	0.0834 (0.07)	0.219	0.949
CD8+CD28-CD27-	ref	0.0041 (0.06)	0.945	0.949
CD8 ED (early differentiated)	ref	0.0687 (0.08)	0.386	0.949
CD8 ID (intermediate differentiated)	ref	0.0347 (0.08)	0.663	0.949
CD8+ TEMRA	ref	0.0738 (0.07)	0.301	0.949
CD8 Tn (naïve)	ref	-0.0816 (0.07)	0.233	0.949
CD8 Tint (intermediate memory)	ref	0.0835 (0.08)	0.325	0.949
CD8 Teff (effector)	ref	-0.0138 (0.07)	0.842	0.949
CD8 Tcm (central memory)	ref	0.1076 (0.08)	0.182	0.949
CD8 Ttm (transitional memory)	ref	0.0285 (0.08)	0.727	0.949
CD8 Tem (effector memory)	ref	0.0380 (0.08)	0.653	0.949
B cells	ref	0.0480 (0.08)	0.567	0.949
gd T cells (gamma delta T cells)	ref	-0.0991 (0.08)	0.237	0.949
Natural Killer (NK) cells	ref	-0.1118 (0.08)	0.182	0.949
CD38+ T cells	ref	-0.0130 (0.09)	0.879	0.949
HLA-DR+ T cells	ref	-0.0800 (0.08)	0.34	0.949
CD38+HLADR+ T cells	ref	-0.0757 (0.08)	0.369	0.949
IgD B cells	ref	0.0437 (0.08)	0.605	0.949
IgM B cells	ref	0.1199 (0.08)	0.16	0.949
IgDIgM Bcells	ref	0.0584 (0.08)	0.489	0.949
CD43+ B cells	ref	-0.1612 (0.08)	0.0604	0.949
CD27+ B cells	ref	-0.0063 (0.08)	0.88	0.949
B1 cells	ref	-0.1471 (0.09)	0.0892	0.949
Memory B cells (Bmem)	ref	0.0334 (0.08)	0.695	0.949
IgD B1cell	ref	0.0271 (0.08)	0.743	0.949
IgM B1cell	ref	-0.0219 (0.08)	0.775	0.949
IgD IgM B1cell	ref	0.0333 (0.08)	0.66	0.949
IgD Bmem	ref	0.1020 (0.08)	0.224	0.949
IgM Bmem	ref	0.1035 (0.08)	0.217	0.949
IgD IgM Bmem	ref	0.1142 (0.08)	0.17	0.949
TH1	ref	0.0047 (0.08)	0.929	0.949
TH2	ref	-0.0174 (0.08)	0.837	0.949
TH17	ref	-0.0962 (0.09)	0.26	0.949
CD4+TNFa+	ref	-0.0871 (0.08)	0.305	0.949
CD4+GRANZYME B+	ref	0.0002 (0.06)	0.943	0.949
CD4+PERFORIN+	ref	-0.0497 (0.08)	0.552	0.949
CD4+TNFa+IFNg+	ref	-0.0214 (0.08)	0.789	0.949
CD4+IL17+IFNg+	ref	0.0506 (0.08)	0.545	0.949
Tc1	ref	0.0742 (0.08)	0.36	0.949
Tc2	ref	-0.0024 (0.09)	0.934	0.949
Tc17	ref	-0.0894 (0.08)	0.289	0.949
CD8+TNFa+	ref	0.0495 (0.08)	0.552	0.949
CD8+Granzyme B+	ref	0.0484 (0.07)	0.474	0.949
CD8+PERFORIN+	ref	0.0906 (0.08)	0.258	0.949
CD8+TNFa+IFNg+	ref	0.0583 (0.08)	0.469	0.949
CD8+IL17+IFNg+	ref	-0.0184 (0.08)	0.813	0.949
CD8+IL17+IFNg+	ref	-0.0978 (0.08)	0.219	0.949
CD4+CD25+	ref	-0.0495 (0.09)	0.563	0.949
CD4+CD25+CD127-	ref	-0.0221 (0.09)	0.796	0.949
CD4+CD25+CD127-Tbet+	ref	0.0551 (0.08)	0.51	0.949
CD4+CD25+CD127-Rorgt+	ref	-0.0202 (0.09)	0.814	0.949
CD4+CD25+CD127-FoxP3+Rorgt+	ref	-0.0618 (0.08)	0.456	0.949
CD4+FoxP3+	ref	-0.1015 (0.08)	0.228	0.949
CD4 FoxP3 Tregs	ref	-0.1003 (0.08)	0.23	0.949
CD4+Tbet+	ref	0.0374 (0.08)	0.658	0.949
CD4+Rorgt+	ref	-0.0293 (0.09)	0.732	0.949
CD4+Tbet+Rorgt+	ref	0.0390 (0.08)	0.645	0.949
CD8+CD25+	ref	0.0043 (0.09)	0.946	0.949
CD8+CD25+CD127-	ref	-0.0044 (0.08)	0.944	0.949
CD8+CD25+CD127-Tbet+	ref	0.0278 (0.08)	0.728	0.949
CD8+CD25+CD127-Rorgt+	ref	0.0123 (0.08)	0.883	0.949
CD8+FoxP3+	ref	-0.0458 (0.08)	0.572	0.949
CD8 FoxP3 Tregs	ref	-0.0824 (0.08)	0.309	0.949
CD8+Tbet+	ref	0.0609 (0.08)	0.462	0.949
CD8+Rorgt+	ref	0.0336 (0.09)	0.693	0.949
CD8+Tbet+Rorgt+	ref	0.0621 (0.08)	0.456	0.949
CD14 total	ref	0.0807 (0.08)	0.368	0.949
CM (Classical Monocytes)	ref	0.1124 (0.08)	0.196	0.949
IM (Intermediate Monocytes)	ref	-0.1645 (0.08)	0.0614	0.949
NCM (Non-classical monocytes)	ref	0.0273 (0.09)	0.721	0.949
TREM2+ CM	ref	0.0839 (0.08)	0.343	0.949
Slan+ CM	ref	-0.0707 (0.08)	0.414	0.949
CD33+ CM	ref	0.1342 (0.08)	0.114	0.949
CD163+ CM	ref	0.0800 (0.08)	0.351	0.949
TREM2+ IM	ref	0.0611 (0.08)	0.48	0.949
Slan+ IM	ref	-0.0128 (0.08)	0.825	0.949
CD33+ IM	ref	0.1223 (0.08)	0.148	0.949
CD163+ IM	ref	0.0089 (0.08)	0.866	0.949
TREM2+ NCM	ref	0.1538 (0.08)	0.0673	0.949
CD87+ NCM	ref	-0.1099 (0.07)	0.13	0.949
CCR2+ NCM	ref	-0.0025 (0.08)	0.835	0.949
Slan+ NCM	ref	-0.0268 (0.08)	0.748	0.949
CD33+ NCM	ref	0.1467 (0.08)	0.0859	0.949
CD163+ NCM	ref	-0.0902 (0.08)	0.29	0.949
CD4/CD8	ref	-0.0142 (0.07)	0.849	0.949
CD4 Tn/Tm	ref	-0.0040 (0.08)	0.919	0.949
CD8 Tn/Tm	ref	-0.0767 (0.07)	0.254	0.949
CMV levels were log-transformed; immune cell phenotypes were inverse normal transformed. Models were fitted for 10 imputed datasets; effect estimates, and p-values were pooled over the 10 fitted models. FDRs were calculated on the pooled p-values b.
