# Supplementary material for: Circulating immune cell phenotypes are associated with age, sex, CMV, and smoking status in the Framingham Heart Study offspring participants
Source: Aging (Albany NY). 2023 Apr 27;15(10):3939–66. doi: 10.18632/aging.204686 (PMC10258017; doi:10.18632/aging.204686)
Supplement: Supplementary Table 18 [file aging-15-204686-s019.xlsx]

## Sheet: Sheet1
Supplementary Table 18. Immune cell phenotype distributions on SBP, TC, and HDL adjusted for all Model 2 covariates a using multiple imputations.
Cell types	SBP			TC			HDL
	Effect	p	FDR	Effect	p	FDR	Effect	p	FDR
T cells	-0.0006 (0.00)	0.739	0.897	-0.0006 (0.00)	0.547	0.9	0.0026 (0.00)	0.254	0.919
T helper cells	0.0008 (0.00)	0.654	0.897	-0.0000 (0.00)	0.827	0.9	0.0028 (0.00)	0.205	0.919
CD4+CD45RA+	0.0005 (0.00)	0.778	0.897	0.0006 (0.00)	0.534	0.9	0.0019 (0.00)	0.422	0.919			a. Model 2 covariates include age, sex, CMV status, education level, APOE genotypes, BMI groups, and indicators of smoking, presence of diabetes, prevalent CVD, prevalent AF, SBP, on hypertension treatment at exam 7, TC, HDL, on lipid treatment at exam 7, and cancer prior to exam 7. CMV was treated as linear with participants whose CMV above LOD was set as a fixed value above the LOD. b. The thre…
CD4+CD45RO+	0.0007 (0.00)	0.722	0.897	-0.0006 (0.00)	0.49	0.9	-0.0029 (0.00)	0.218	0.919
CD4+CD28-	0.0017 (0.00)	0.303	0.808	0.0004 (0.00)	0.612	0.9	-0.0020 (0.00)	0.334	0.919
CD4+CD57+	0.0020 (0.00)	0.204	0.757	-0.0000 (0.00)	0.88	0.9	-0.0018 (0.00)	0.329	0.919
CD4+CD95+	-0.0011 (0.00)	0.577	0.897	-0.0002 (0.00)	0.802	0.9	-0.0024 (0.00)	0.3	0.919
CD4+CD127+	-0.0011 (0.00)	0.566	0.897	-0.0001 (0.00)	0.859	0.9	-0.0025 (0.00)	0.281	0.919
CD4+CD137+	-0.0053 (0.00)	0.00541	0.322	-0.0002 (0.00)	0.767	0.9	0.0024 (0.00)	0.315	0.919
CD4+CD27-	0.0024 (0.00)	0.168	0.757	-0.0010 (0.00)	0.253	0.9	-0.0028 (0.00)	0.184	0.919
CD4+PD1+	-0.0030 (0.00)	0.12	0.754	0.0009 (0.00)	0.358	0.9	0.0017 (0.00)	0.468	0.919
CD4+CD28-CD57+	0.0012 (0.00)	0.4	0.881	0.0002 (0.00)	0.796	0.9	-0.0014 (0.00)	0.434	0.919
CD4+CD28-CD27-	0.0020 (0.00)	0.192	0.757	-0.0000 (0.00)	0.893	0.9	-0.0020 (0.00)	0.26	0.919
CD4 ED (early differentiated)	-0.0006 (0.00)	0.769	0.897	-0.0002 (0.00)	0.819	0.9	-0.0014 (0.00)	0.562	0.919
CD4 ID (intermediate differentiated)	0.0010 (0.00)	0.544	0.897	-0.0010 (0.00)	0.205	0.9	0.0009 (0.00)	0.622	0.919
CD4+ TEMRA	0.0009 (0.00)	0.539	0.897	0.0008 (0.00)	0.304	0.9	-0.0016 (0.00)	0.373	0.919
CD4 Tn (naïve)	0.0006 (0.00)	0.754	0.897	0.0010 (0.00)	0.286	0.9	0.0020 (0.00)	0.389	0.919
CD4 Tint (intermediate memory)	-0.0016 (0.00)	0.416	0.884	-0.0013 (0.00)	0.162	0.9	0.0002 (0.00)	0.795	0.919
CD4 Teff (effector)	-0.0008 (0.00)	0.608	0.897	-0.0006 (0.00)	0.428	0.9	-0.0007 (0.00)	0.709	0.919
CD4 Tcm (central memory)	0.0009 (0.00)	0.655	0.897	0.0002 (0.00)	0.815	0.9	-0.0010 (0.00)	0.633	0.919
CD4 Ttm (transitional memory)	-0.0020 (0.00)	0.307	0.808	-0.0013 (0.00)	0.171	0.9	-0.0004 (0.00)	0.758	0.919
CD4 Tem (effector memory)	-0.0000 (0.00)	0.94	0.956	-0.0012 (0.00)	0.169	0.9	-0.0028 (0.00)	0.196	0.919
Cytotoxic T cells	0.0024 (0.00)	0.156	0.757	-0.0015 (0.00)	0.086	0.9	-0.0023 (0.00)	0.27	0.919
CD8+CD45RA+	0.0014 (0.00)	0.45	0.884	0.0001 (0.00)	0.883	0.9	0.0017 (0.00)	0.449	0.919
CD8+CD45RO+	0.0000 (0.00)	0.949	0.957	-0.0003 (0.00)	0.727	0.9	-0.0002 (0.00)	0.894	0.919
CD8+CD28-	0.0024 (0.00)	0.12	0.754	0.0002 (0.00)	0.777	0.9	0.0005 (0.00)	0.783	0.919
CD8+CD57+	0.0023 (0.00)	0.143	0.757	0.0003 (0.00)	0.693	0.9	-0.0006 (0.00)	0.737	0.919
CD8+CD95+	0.0018 (0.00)	0.343	0.834	-0.0005 (0.00)	0.599	0.9	-0.0019 (0.00)	0.409	0.919
CD8+CD127+	-0.0020 (0.00)	0.261	0.808	0.0004 (0.00)	0.651	0.9	-0.0012 (0.00)	0.57	0.919
CD8+CD137+	-0.0018 (0.00)	0.355	0.84	-0.0003 (0.00)	0.774	0.9	0.0032 (0.00)	0.169	0.919
CD8+CD27-	0.0044 (0.00)	0.00407	0.322	-0.0005 (0.00)	0.479	0.9	-0.0003 (0.00)	0.851	0.919
CD8+PD1+	-0.0040 (0.00)	0.0384	0.546	0.0010 (0.00)	0.292	0.9	0.0030 (0.00)	0.198	0.919
CD8+CD28-CD57+	0.0027 (0.00)	0.0739	0.547	-0.0000 (0.00)	0.908	0.908	-0.0008 (0.00)	0.666	0.919
CD8+CD28-CD27-	0.0037 (0.00)	0.0113	0.336	0.0001 (0.00)	0.888	0.9	-0.0004 (0.00)	0.831	0.919
CD8 ED (early differentiated)	-0.0021 (0.00)	0.235	0.799	0.0011 (0.00)	0.224	0.9	-0.0002 (0.00)	0.874	0.919
CD8 ID (intermediate differentiated)	-0.0019 (0.00)	0.302	0.808	0.0005 (0.00)	0.566	0.9	-0.0001 (0.00)	0.897	0.919
CD8+ TEMRA	0.0028 (0.00)	0.0782	0.547	0.0007 (0.00)	0.384	0.9	-0.0001 (0.00)	0.912	0.919
CD8 Tn (naïve)	-0.0024 (0.00)	0.128	0.754	0.0004 (0.00)	0.614	0.9	0.0009 (0.00)	0.65	0.919
CD8 Tint (intermediate memory)	-0.0004 (0.00)	0.831	0.913	0.0008 (0.00)	0.406	0.9	0.0024 (0.00)	0.285	0.919
CD8 Teff (effector)	0.0032 (0.00)	0.0454	0.546	0.0004 (0.00)	0.575	0.9	0.0004 (0.00)	0.832	0.919
CD8 Tcm (central memory)	0.0006 (0.00)	0.745	0.897	0.0002 (0.00)	0.811	0.9	-0.0009 (0.00)	0.682	0.919
CD8 Ttm (transitional memory)	-0.0035 (0.00)	0.057	0.547	0.0010 (0.00)	0.279	0.9	0.0005 (0.00)	0.794	0.919
CD8 Tem (effector memory)	0.0014 (0.00)	0.463	0.884	-0.0009 (0.00)	0.356	0.9	0.0001 (0.00)	0.888	0.919
B cells	-0.0023 (0.00)	0.231	0.799	0.0002 (0.00)	0.776	0.9	0.0002 (0.00)	0.849	0.919
gd T cells (gamma delta T cells)	-0.0046 (0.00)	0.0156	0.371	-0.0000 (0.00)	0.865	0.9	-0.0032 (0.00)	0.164	0.919
Natural Killer (NK) cells	0.0023 (0.00)	0.217	0.781	-0.0002 (0.00)	0.794	0.9	-0.0000 (0.00)	0.904	0.919
CD38+ T cells	-0.0034 (0.00)	0.0771	0.547	0.0013 (0.00)	0.168	0.9	-0.0008 (0.00)	0.745	0.919
HLA-DR+ T cells	0.0002 (0.00)	0.909	0.932	-0.0005 (0.00)	0.616	0.9	-0.0019 (0.00)	0.406	0.919
CD38+HLADR+ T cells	-0.0020 (0.00)	0.292	0.808	0.0006 (0.00)	0.498	0.9	-0.0023 (0.00)	0.306	0.919
IgD B cells	0.0009 (0.00)	0.63	0.897	-0.0001 (0.00)	0.778	0.9	-0.0043 (0.00)	0.0754	0.919
IgM B cells	0.0006 (0.00)	0.743	0.897	-0.0008 (0.00)	0.436	0.9	-0.0037 (0.00)	0.117	0.919
IgDIgM Bcells	0.0015 (0.00)	0.465	0.884	-0.0001 (0.00)	0.783	0.9	-0.0048 (0.00)	0.0458	0.919
CD43+ B cells	-0.0018 (0.00)	0.382	0.857	0.0004 (0.00)	0.645	0.9	-0.0021 (0.00)	0.368	0.919
CD27+ B cells	0.0002 (0.00)	0.79	0.897	0.0014 (0.00)	0.133	0.9	0.0009 (0.00)	0.677	0.919
B1 cells	-0.0022 (0.00)	0.258	0.808	0.0004 (0.00)	0.66	0.9	-0.0011 (0.00)	0.635	0.919
Memory B cells (Bmem)	0.0002 (0.00)	0.799	0.897	0.0018 (0.00)	0.053	0.9	0.0009 (0.00)	0.683	0.919
IgD B1cell	-0.0011 (0.00)	0.58	0.897	0.0011 (0.00)	0.215	0.9	-0.0017 (0.00)	0.444	0.919
IgM B1cell	-0.0013 (0.00)	0.501	0.897	-0.0011 (0.00)	0.253	0.9	-0.0016 (0.00)	0.515	0.919
IgD IgM B1cell	0.0004 (0.00)	0.788	0.897	0.0005 (0.00)	0.56	0.9	-0.0025 (0.00)	0.269	0.919
IgD Bmem	-0.0014 (0.00)	0.459	0.884	0.0005 (0.00)	0.571	0.9	-0.0020 (0.00)	0.384	0.919
IgM Bmem	-0.0026 (0.00)	0.188	0.757	-0.0001 (0.00)	0.848	0.9	-0.0003 (0.00)	0.75	0.919
IgD IgM Bmem	-0.0011 (0.00)	0.575	0.897	0.0004 (0.00)	0.648	0.9	-0.0025 (0.00)	0.271	0.919
TH1	0.0019 (0.00)	0.29	0.808	-0.0002 (0.00)	0.789	0.9	-0.0033 (0.00)	0.131	0.919
TH2	-0.0025 (0.00)	0.193	0.757	-0.0006 (0.00)	0.541	0.9	-0.0003 (0.00)	0.788	0.919
TH17	-0.0002 (0.00)	0.905	0.932	0.0003 (0.00)	0.737	0.9	0.0012 (0.00)	0.609	0.919
CD4+TNFa+	0.0008 (0.00)	0.667	0.897	0.0001 (0.00)	0.88	0.9	-0.0022 (0.00)	0.364	0.919
CD4+GRANZYME B+	0.0005 (0.00)	0.704	0.897	0.0004 (0.00)	0.518	0.9	-0.0005 (0.00)	0.764	0.919
CD4+PERFORIN+	0.0027 (0.00)	0.151	0.757	-0.0002 (0.00)	0.784	0.9	0.0013 (0.00)	0.563	0.919
CD4+TNFa+IFNg+	-0.0004 (0.00)	0.83	0.913	-0.0003 (0.00)	0.754	0.9	-0.0023 (0.00)	0.291	0.919
CD4+IL17+IFNg+	0.0017 (0.00)	0.36	0.84	-0.0013 (0.00)	0.18	0.9	-0.0017 (0.00)	0.474	0.919
Tc1	0.0034 (0.00)	0.0653	0.547	0.0002 (0.00)	0.729	0.9	-0.0019 (0.00)	0.39	0.919
Tc2	-0.0026 (0.00)	0.177	0.757	-0.0001 (0.00)	0.805	0.9	0.0010 (0.00)	0.662	0.919
Tc17	-0.0007 (0.00)	0.713	0.897	0.0007 (0.00)	0.444	0.9	0.0004 (0.00)	0.854	0.919
CD8+TNFa+	0.0003 (0.00)	0.885	0.932	0.0002 (0.00)	0.817	0.9	-0.0001 (0.00)	0.854	0.919
CD8+Granzyme B+	0.0023 (0.00)	0.133	0.754	-0.0002 (0.00)	0.769	0.9	0.0002 (0.00)	0.875	0.919
CD8+PERFORIN+	0.0019 (0.00)	0.283	0.808	-0.0002 (0.00)	0.787	0.9	-0.0002 (0.00)	0.816	0.919
CD8+TNFa+IFNg+	0.0006 (0.00)	0.73	0.897	0.0000 (0.00)	0.86	0.9	-0.0003 (0.00)	0.81	0.919
CD8+IL17+IFNg+	0.0046 (0.00)	0.00888	0.336	-0.0009 (0.00)	0.284	0.9	0.0021 (0.00)	0.328	0.919
CD8+IL17+IFNg+	0.0007 (0.00)	0.678	0.897	-0.0003 (0.00)	0.715	0.9	-0.0007 (0.00)	0.733	0.919
CD4+CD25+	-0.0006 (0.00)	0.759	0.897	-0.0011 (0.00)	0.241	0.9	0.0022 (0.00)	0.335	0.919
CD4+CD25+CD127-	-0.0002 (0.00)	0.903	0.932	-0.0005 (0.00)	0.628	0.9	0.0022 (0.00)	0.357	0.919
CD4+CD25+CD127-Tbet+	-0.0019 (0.00)	0.328	0.813	-0.0002 (0.00)	0.822	0.9	-0.0012 (0.00)	0.608	0.919
CD4+CD25+CD127-Rorgt+	-0.0004 (0.00)	0.846	0.915	-0.0004 (0.00)	0.696	0.9	0.0017 (0.00)	0.464	0.919
CD4+CD25+CD127-FoxP3+Rorgt+	-0.0009 (0.00)	0.643	0.897	0.0007 (0.00)	0.47	0.9	0.0002 (0.00)	0.816	0.919
CD4+FoxP3+	-0.0004 (0.00)	0.836	0.913	0.0006 (0.00)	0.536	0.9	-0.0018 (0.00)	0.448	0.919
CD4 FoxP3 Tregs	0.0017 (0.00)	0.371	0.85	-0.0000 (0.00)	0.863	0.9	-0.0004 (0.00)	0.737	0.919
CD4+Tbet+	-0.0008 (0.00)	0.674	0.897	-0.0008 (0.00)	0.376	0.9	-0.0012 (0.00)	0.6	0.919
CD4+Rorgt+	0.0008 (0.00)	0.697	0.897	-0.0006 (0.00)	0.544	0.9	0.0013 (0.00)	0.584	0.919
CD4+Tbet+Rorgt+	-0.0008 (0.00)	0.693	0.897	-0.0008 (0.00)	0.387	0.9	-0.0011 (0.00)	0.633	0.919
CD8+CD25+	-0.0020 (0.00)	0.291	0.808	0.0000 (0.00)	0.886	0.9	0.0002 (0.00)	0.875	0.919
CD8+CD25+CD127-	-0.0003 (0.00)	0.884	0.932	-0.0002 (0.00)	0.823	0.9	0.0009 (0.00)	0.676	0.919
CD8+CD25+CD127-Tbet+	-0.0001 (0.00)	0.964	0.964	-0.0002 (0.00)	0.83	0.9	0.0000 (0.00)	0.922	0.922
CD8+CD25+CD127-Rorgt+	-0.0005 (0.00)	0.794	0.897	-0.0000 (0.00)	0.843	0.9	0.0013 (0.00)	0.562	0.919
CD8+FoxP3+	0.0007 (0.00)	0.704	0.897	0.0001 (0.00)	0.785	0.9	-0.0001 (0.00)	0.869	0.919
CD8 FoxP3 Tregs	-0.0012 (0.00)	0.509	0.897	0.0000 (0.00)	0.863	0.9	0.0011 (0.00)	0.605	0.919
CD8+Tbet+	-0.0012 (0.00)	0.531	0.897	0.0008 (0.00)	0.401	0.9	-0.0033 (0.00)	0.144	0.919
CD8+Rorgt+	-0.0019 (0.00)	0.328	0.813	0.0010 (0.00)	0.269	0.9	-0.0013 (0.00)	0.577	0.919
CD8+Tbet+Rorgt+	-0.0011 (0.00)	0.557	0.897	0.0008 (0.00)	0.398	0.9	-0.0029 (0.00)	0.198	0.919
CD14 total	0.0035 (0.00)	0.0763	0.547	-0.0004 (0.00)	0.666	0.9	-0.0033 (0.00)	0.166	0.919
CM (Classical Monocytes)	0.0015 (0.00)	0.446	0.884	0.0017 (0.00)	0.089	0.9	-0.0040 (0.00)	0.0793	0.919
IM (Intermediate Monocytes)	-0.0022 (0.00)	0.259	0.808	-0.0014 (0.00)	0.152	0.9	0.0029 (0.00)	0.212	0.919
NCM (Non-classical monocytes)	0.0008 (0.00)	0.686	0.897	-0.0012 (0.00)	0.229	0.9	0.0029 (0.00)	0.212	0.919
TREM2+ CM	-0.0007 (0.00)	0.732	0.897	-0.0003 (0.00)	0.627	0.9	0.0009 (0.00)	0.638	0.919
Slan+ CM	0.0040 (0.00)	0.0393	0.546	0.0023 (0.00)	0.0157	0.9	-0.0007 (0.00)	0.736	0.919
CD33+ CM	0.0014 (0.00)	0.471	0.884	0.0008 (0.00)	0.385	0.9	-0.0007 (0.00)	0.752	0.919
CD163+ CM	-0.0012 (0.00)	0.531	0.897	-0.0002 (0.00)	0.713	0.9	0.0034 (0.00)	0.151	0.919
TREM2+ IM	-0.0014 (0.00)	0.475	0.884	0.0003 (0.00)	0.589	0.9	0.0011 (0.00)	0.601	0.919
Slan+ IM	0.0046 (0.00)	0.0197	0.391	0.0018 (0.00)	0.0573	0.9	-0.0006 (0.00)	0.742	0.919
CD33+ IM	0.0020 (0.00)	0.312	0.808	0.0008 (0.00)	0.387	0.9	-0.0022 (0.00)	0.336	0.919
CD163+ IM	0.0000 (0.00)	0.855	0.917	0.0005 (0.00)	0.617	0.9	0.0028 (0.00)	0.234	0.919
TREM2+ NCM	-0.0015 (0.00)	0.439	0.884	0.0004 (0.00)	0.633	0.9	0.0016 (0.00)	0.475	0.919
CD87+ NCM	-0.0009 (0.00)	0.585	0.897	-0.0002 (0.00)	0.731	0.9	-0.0025 (0.00)	0.191	0.919
CCR2+ NCM	-0.0027 (0.00)	0.16	0.757	-0.0011 (0.00)	0.281	0.9	0.0038 (0.00)	0.0916	0.919
Slan+ NCM	0.0036 (0.00)	0.0699	0.547	0.0024 (0.00)	0.0112	0.9	-0.0018 (0.00)	0.419	0.919
CD33+ NCM	0.0012 (0.00)	0.534	0.897	0.0015 (0.00)	0.127	0.9	-0.0002 (0.00)	0.825	0.919
CD163+ NCM	-0.0025 (0.00)	0.202	0.757	-0.0003 (0.00)	0.698	0.9	0.0010 (0.00)	0.608	0.919
CD4/CD8	-0.0014 (0.00)	0.416	0.884	0.0009 (0.00)	0.261	0.9	0.0025 (0.00)	0.24	0.919
CD4 Tn/Tm	0.0006 (0.00)	0.723	0.897	0.0009 (0.00)	0.331	0.9	0.0027 (0.00)	0.241	0.919
CD8 Tn/Tm	-0.0030 (0.00)	0.0459	0.546	0.0004 (0.00)	0.577	0.9	0.0005 (0.00)	0.735	0.919
CMV levels were log-transformed; immune cell phenotypes were inverse normal transformed. Models were fitted for 10 imputed datasets; effect estimates, and p-values were pooled over the 10 fitted models. FDRs were calculated on the pooled p-values b.
